# Supplementary material for: Understanding acute metabolic decompensation in propionic and methylmalonic acidemias: a deep metabolic phenotyping approach
Source: PubMed Central journal article supplement (PMC7060614; doi:10.1186/s13023-020-1347-3), 2020-03-06

# Supplementary Figure 1

## General disease biomarkers for PA and MMA, from targeted metabolic assays

Propionylcarnitine (PL)

Glycine (PL)

Isoleucine (PL)

Valine (PL)

Leucine (PL)

Threonine (PL)

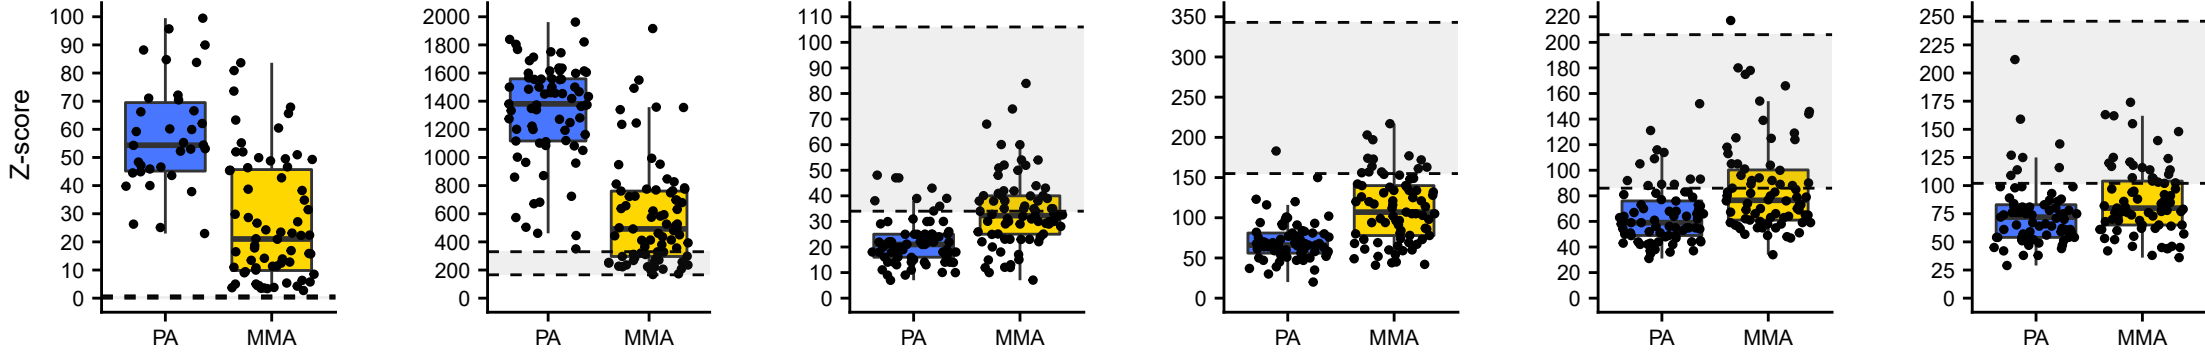

## General disease biomarkers for PA, from targeted metabolic assays

Acetylcarnitine (PL)

Methylcitric acid (U)

3-OH-Propionic acid (U)

Histidine (PL)

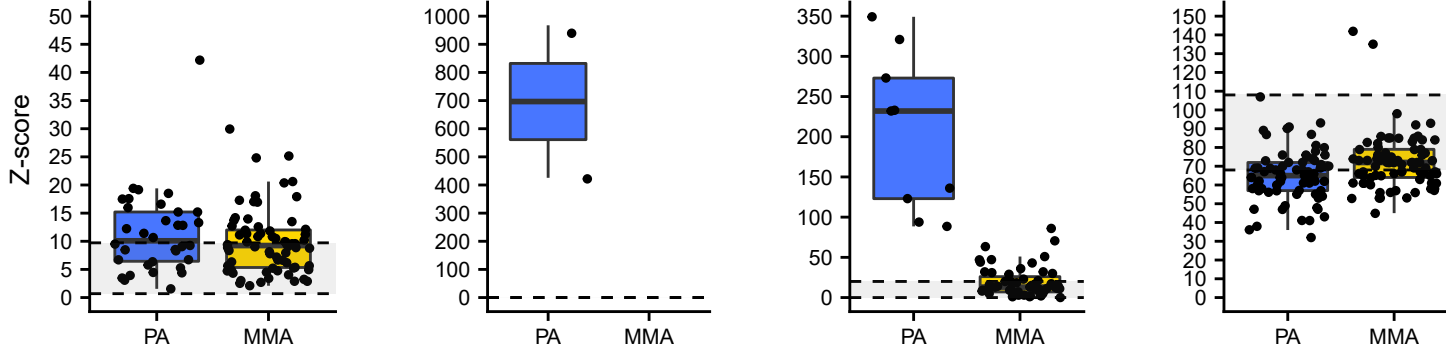

## General disease biomarkers for MMA, from targeted metabolic assays

Methylmalonic acid (U)

Methylmalonic acid (PL)

Methylmalonylcarnitine (PL)

Methylcitric acid (PL)

Glutamine (PL)

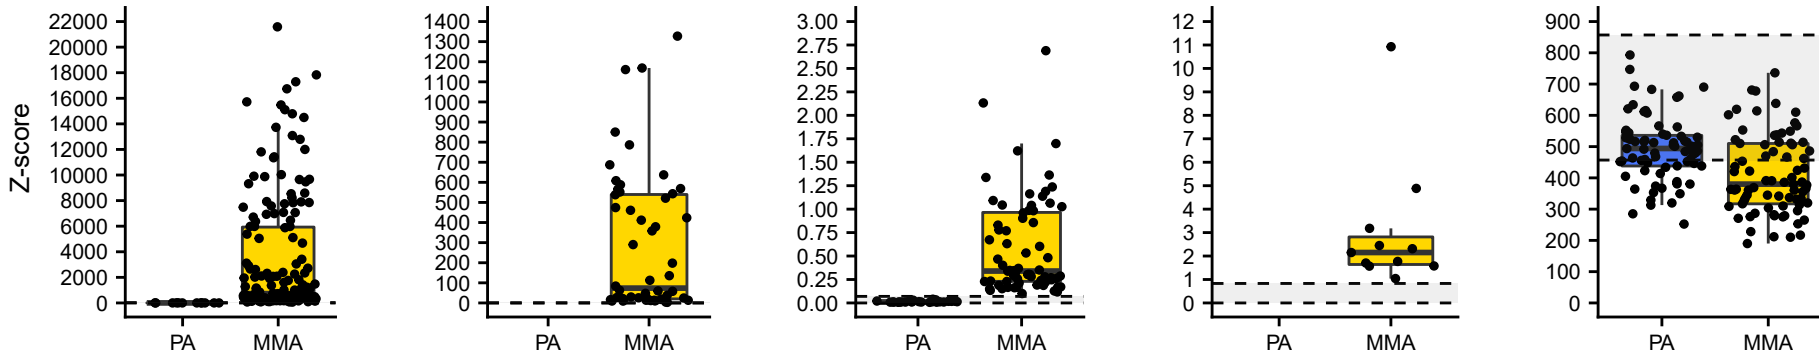

# Supplementary Figure 2

## General disease biomarkers for PA and MMA (increased), from DI-HRMS analysis

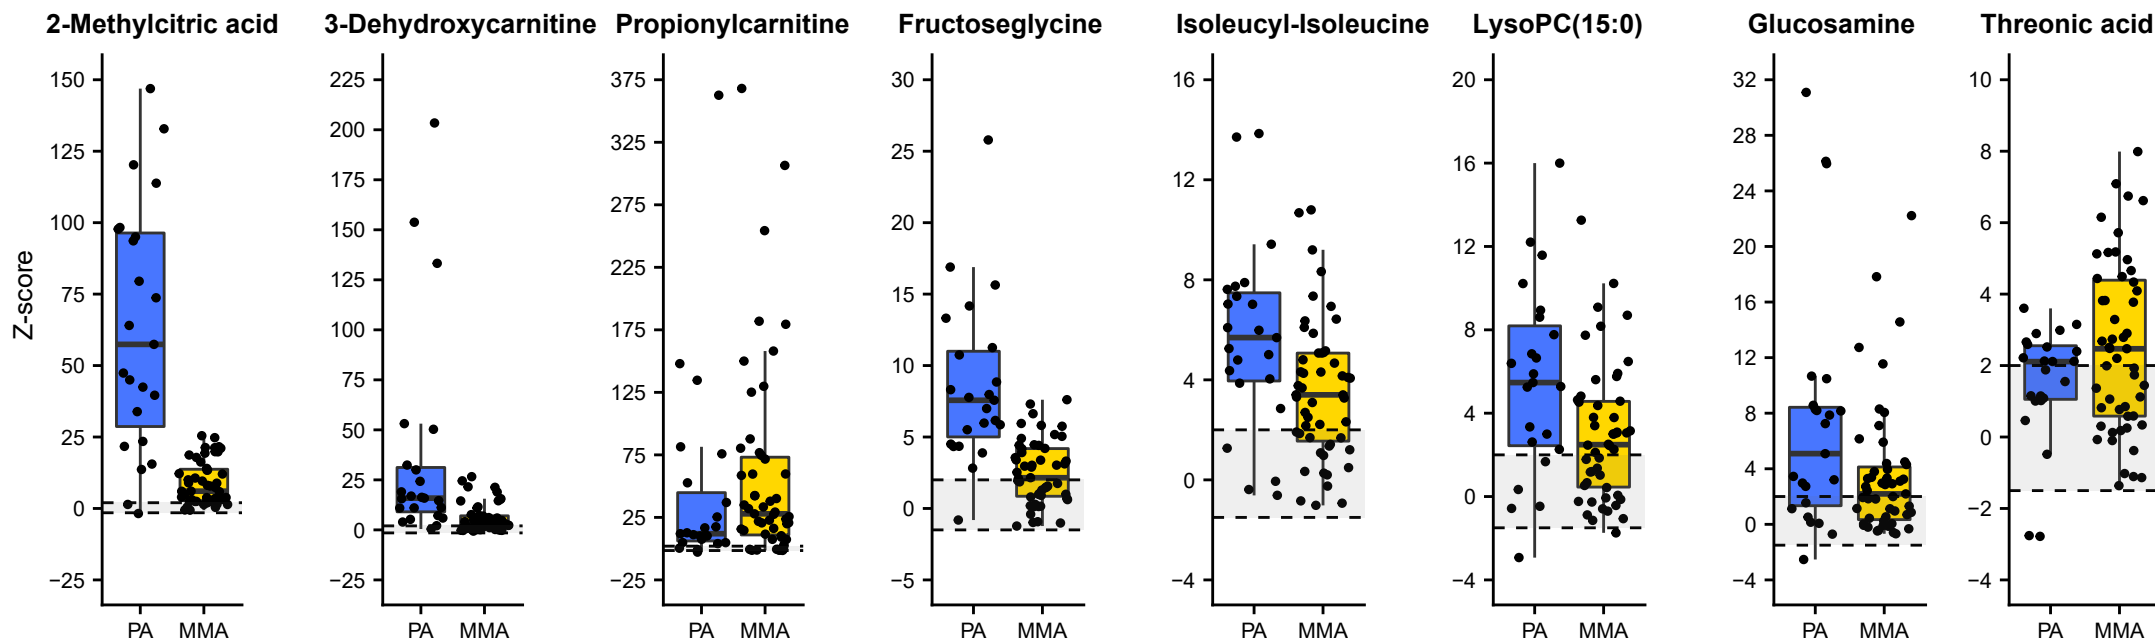

## General disease biomarkers for PA and MMA (decreased), from DI-HRMS analysis

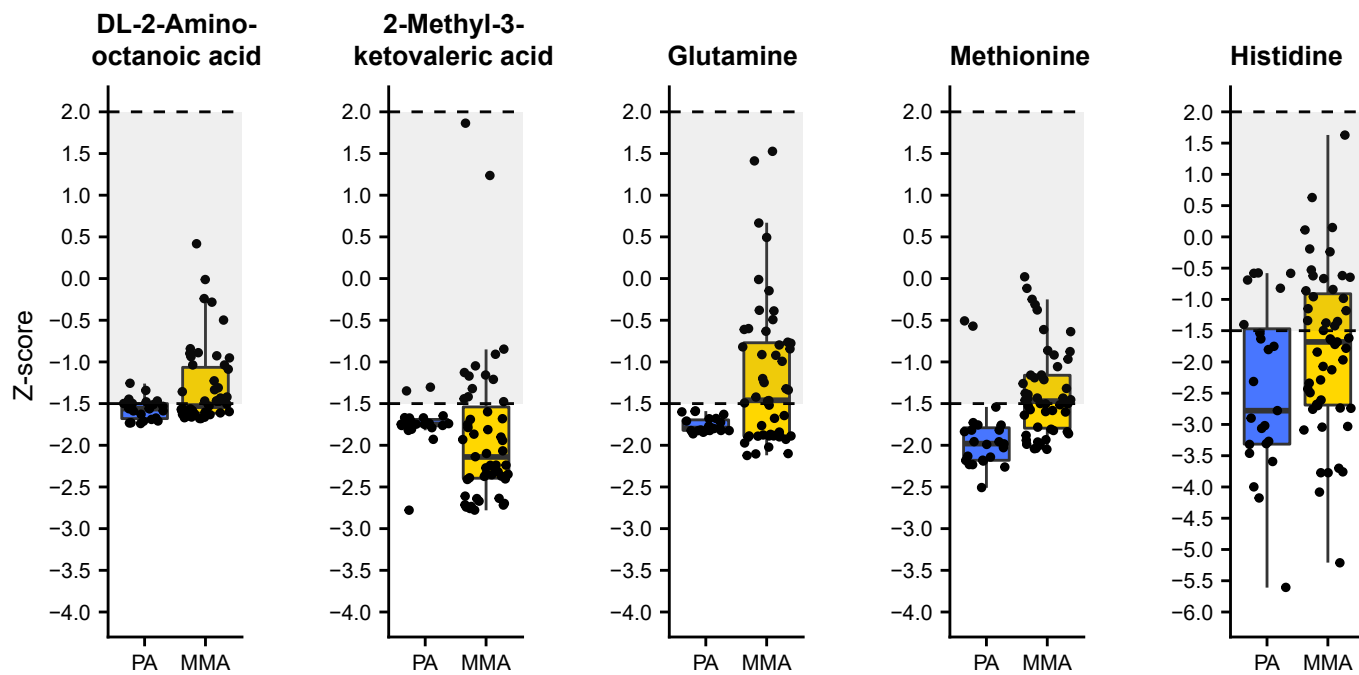

# Supplementary Figure 3

## General disease biomarkers for PA, from DI-HRMS analysis

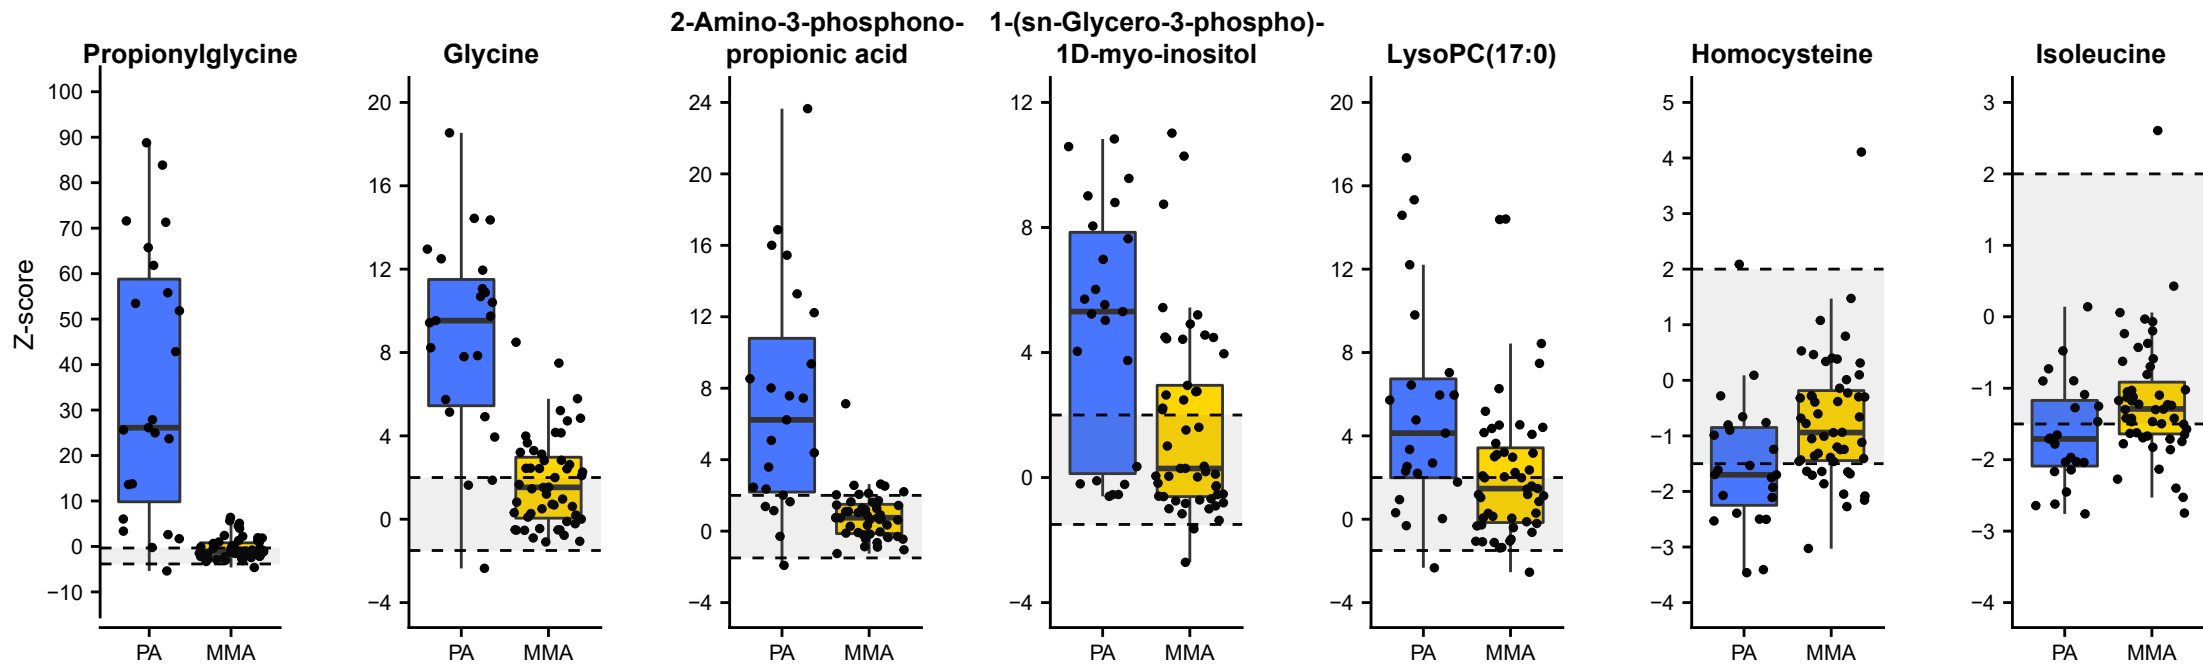

## General disease biomarkers for MMA, from DI-HRMS analysis

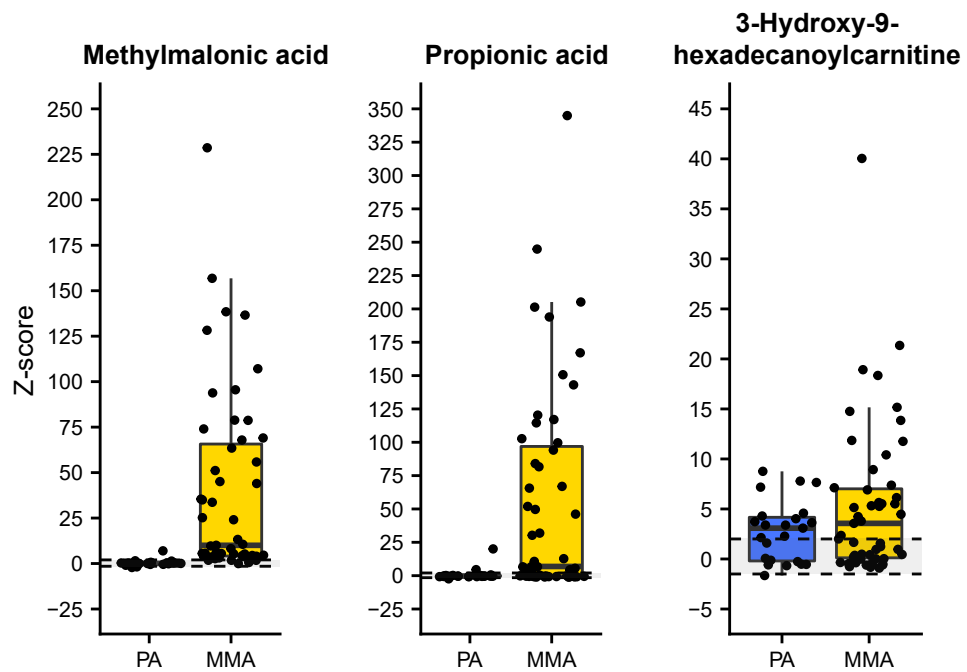

# Supplementary Figure 4

## PLS-DA, VIP-scores and heatmap for PA samples versus control samples

A) DBS

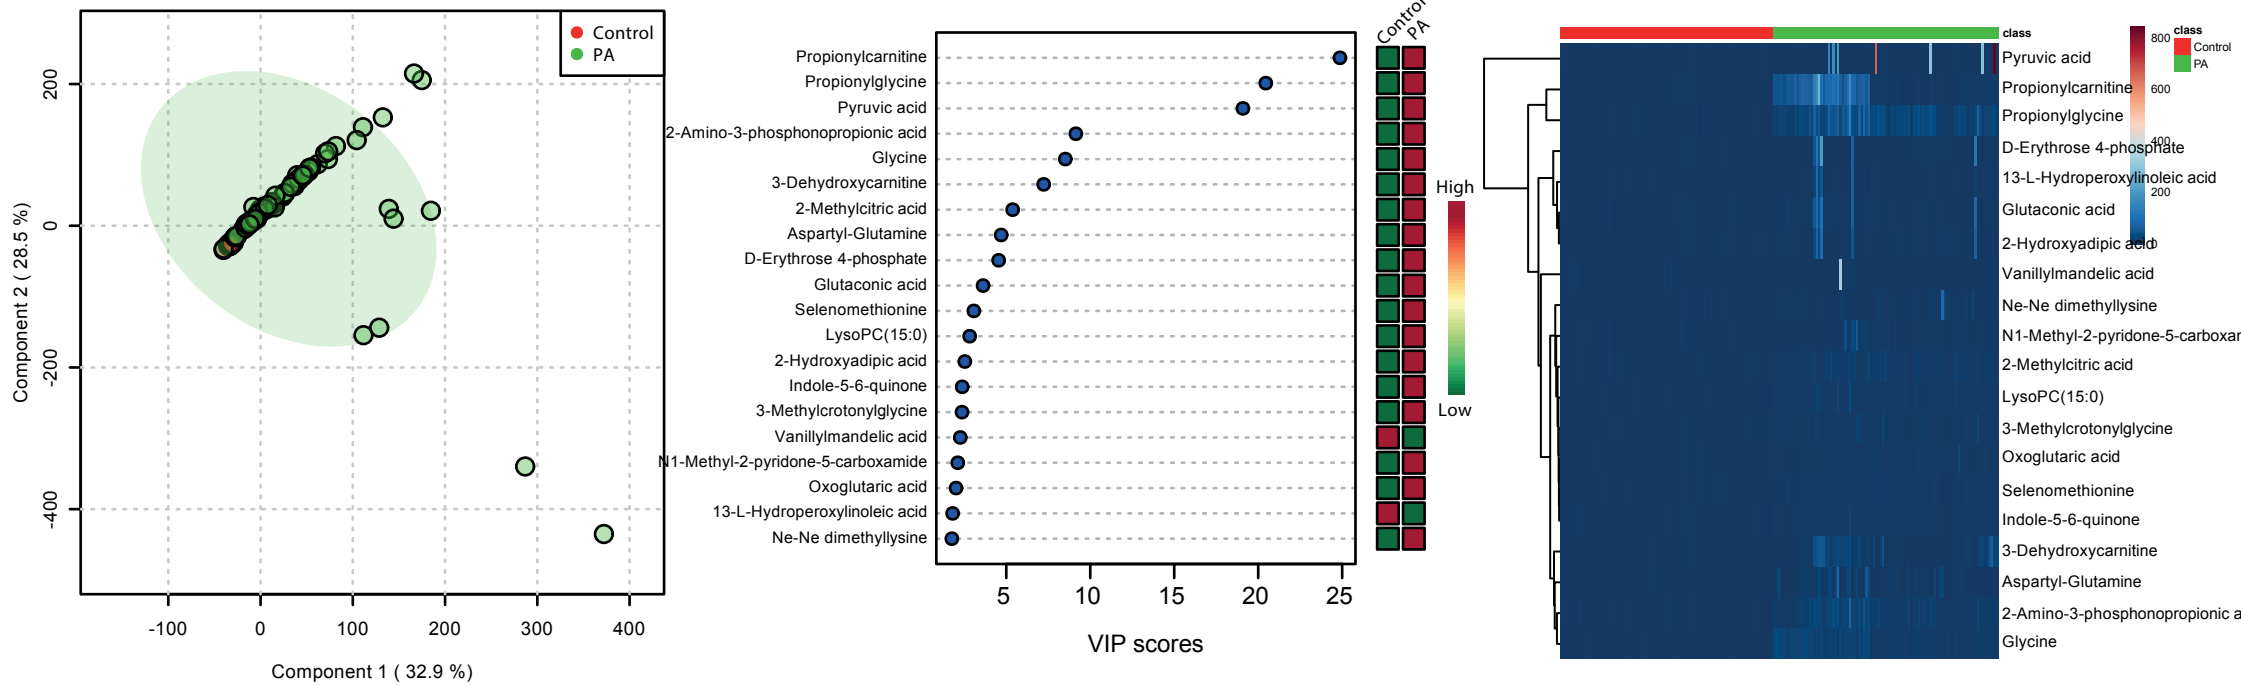

B) Plasma

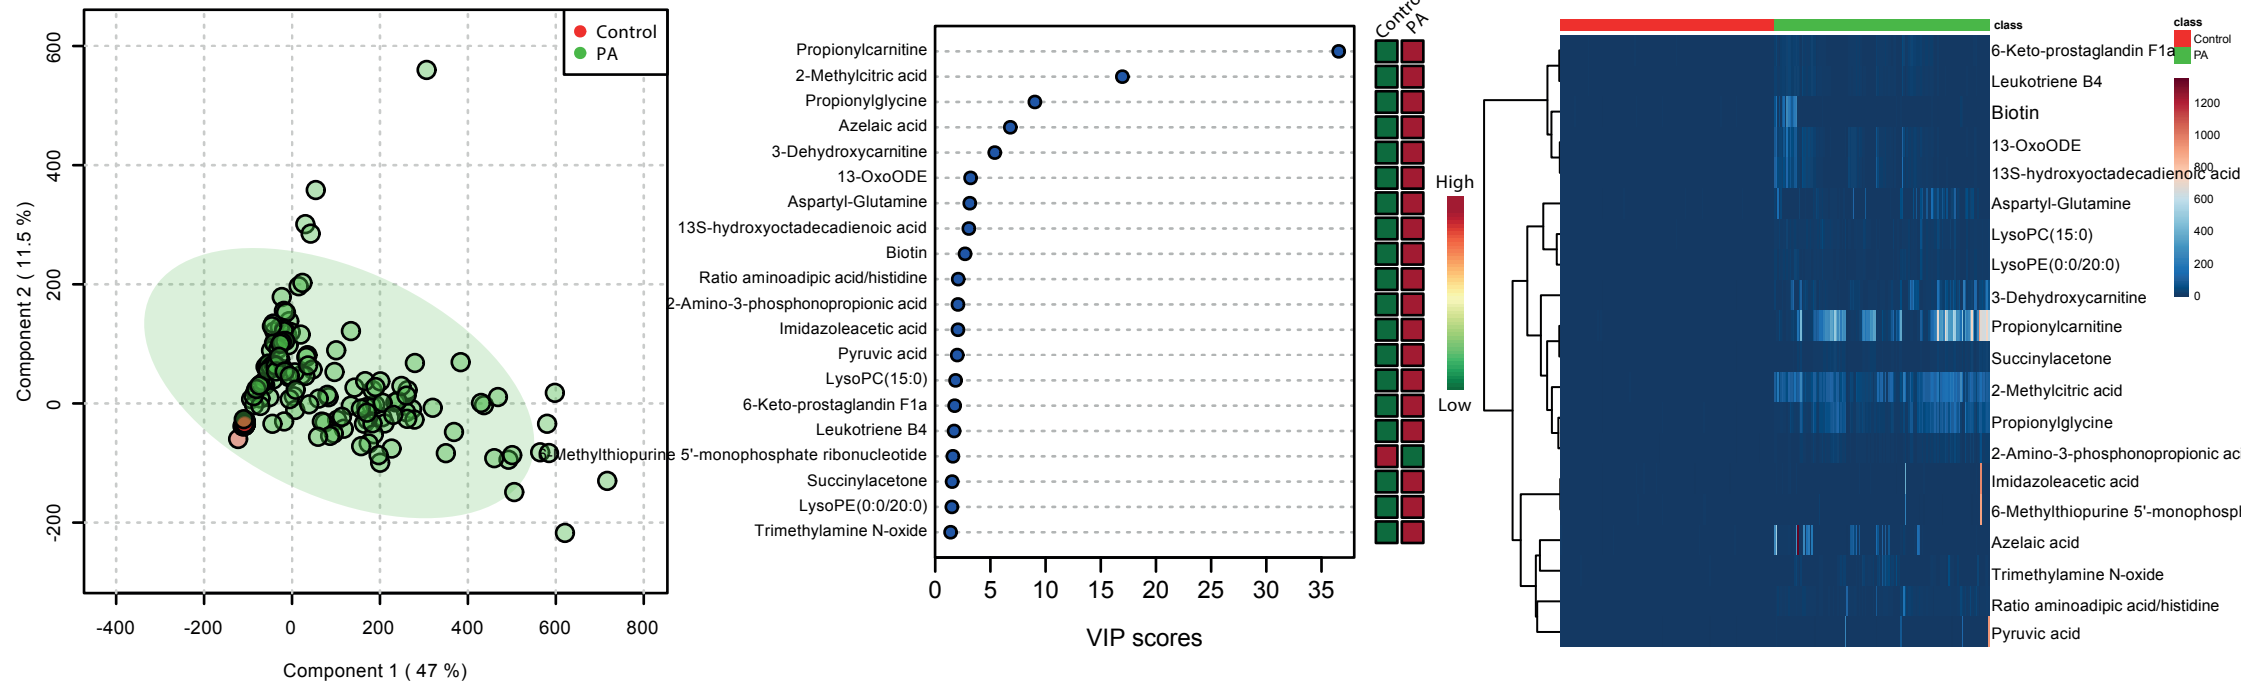



Propionylcarnitine (PL)

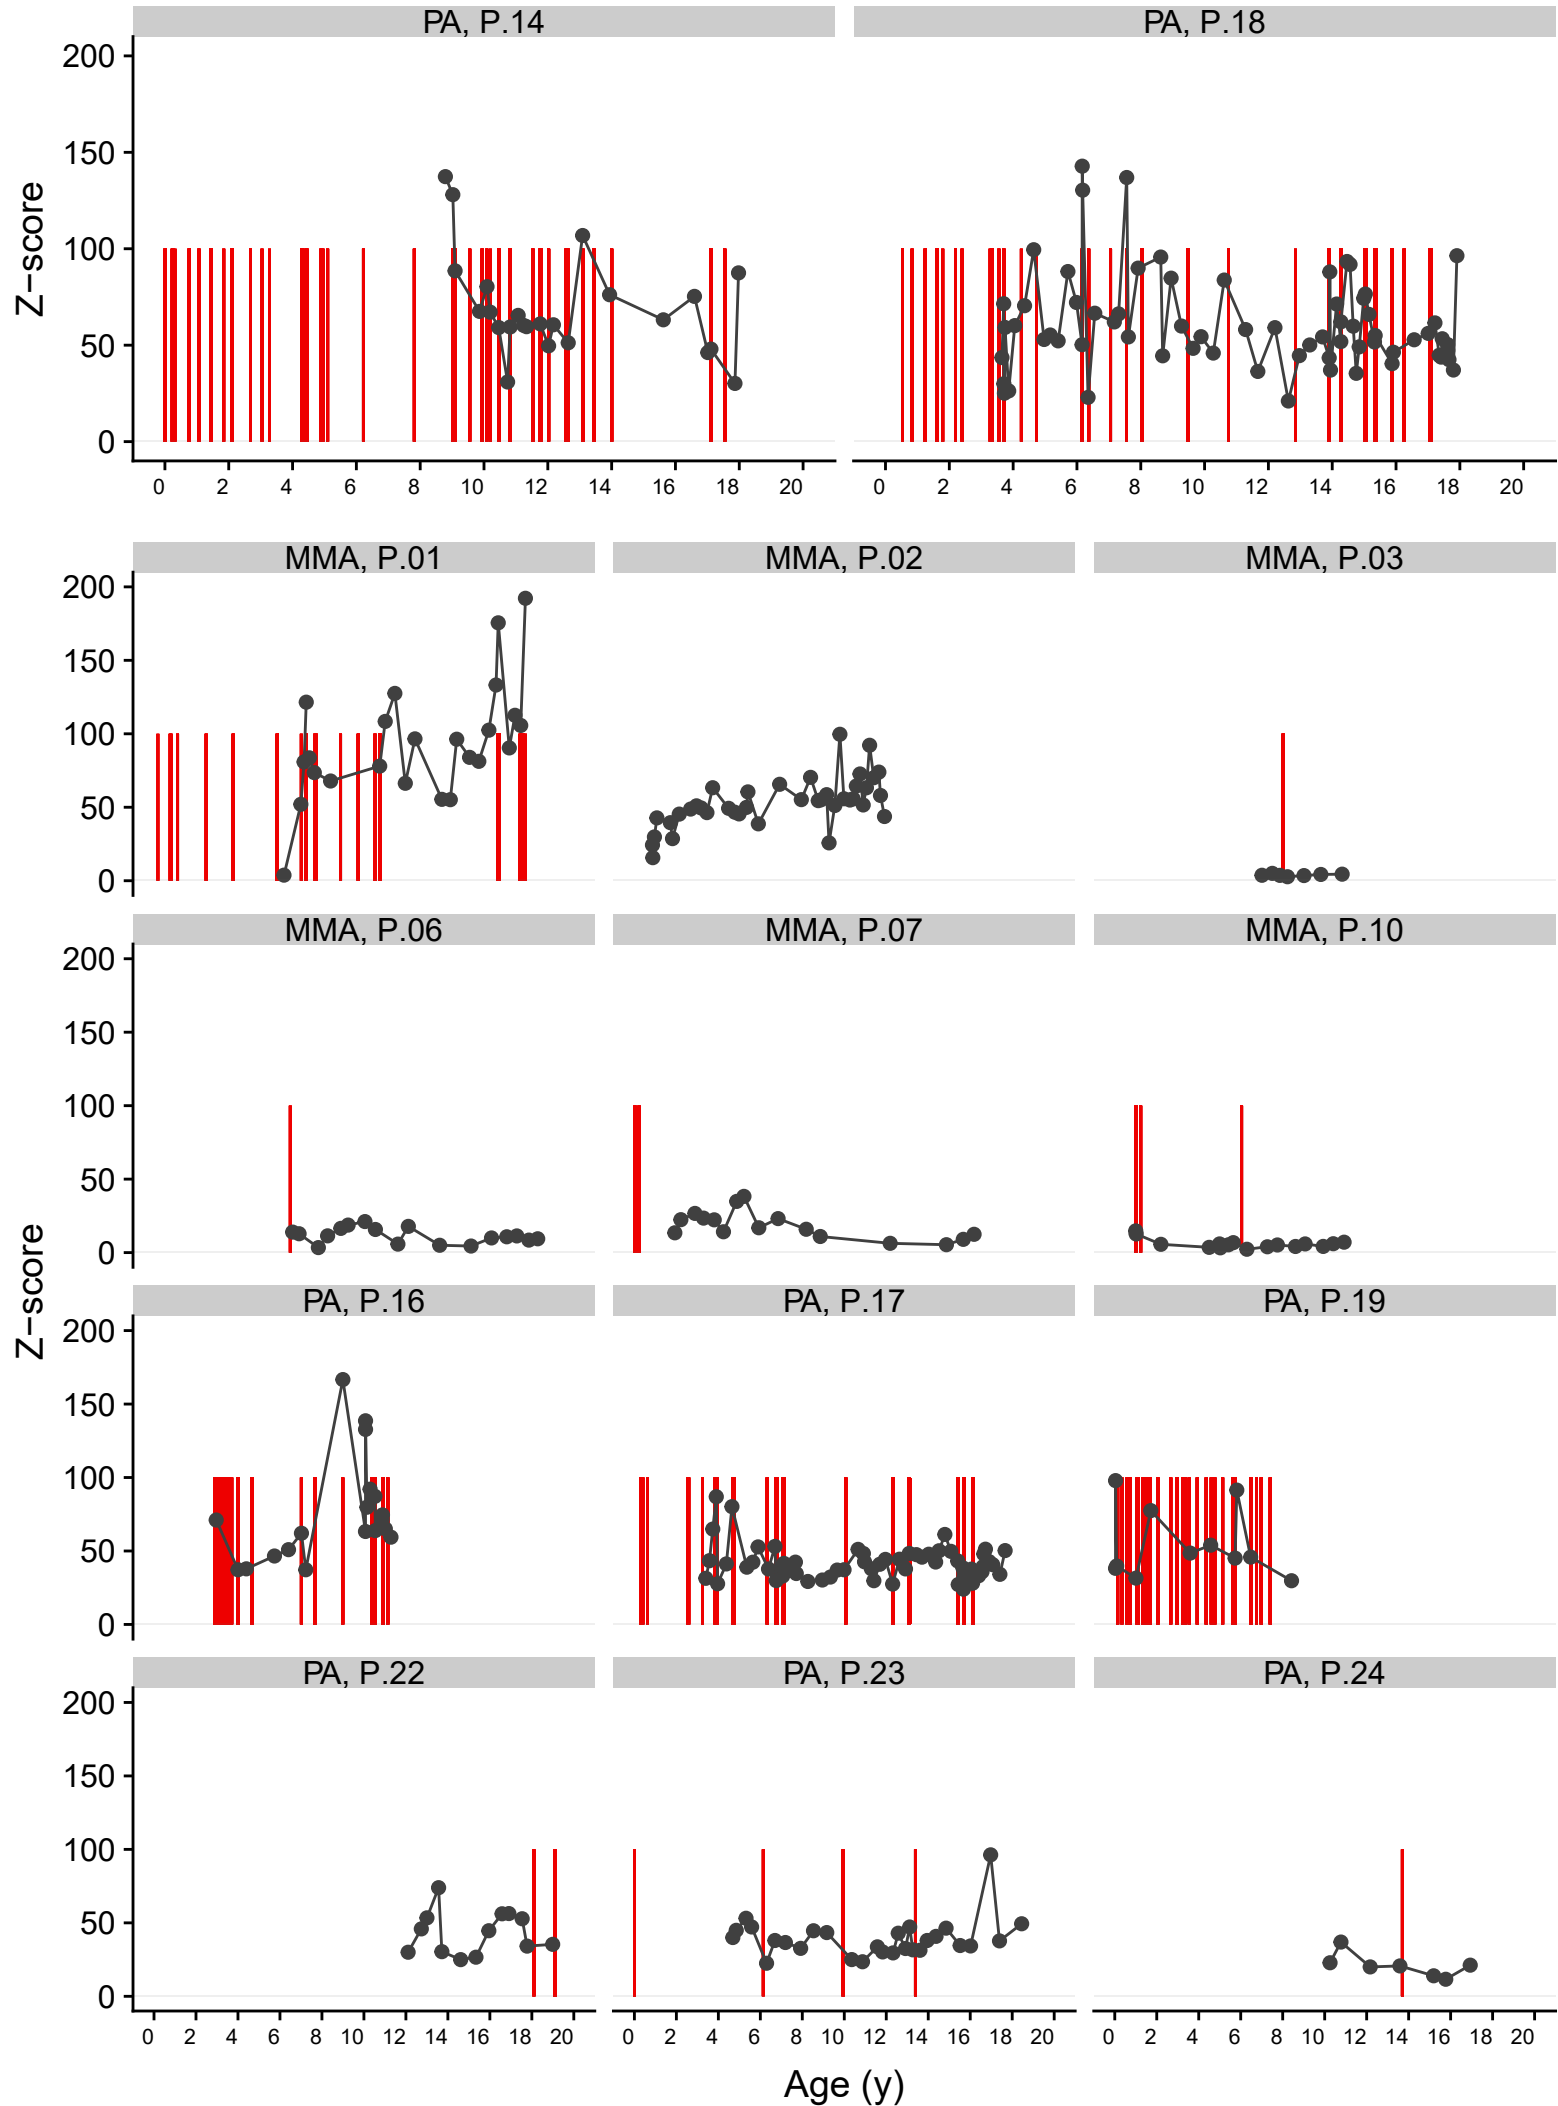

# Supplementary Figure 6

## Propionylcarnitine (DI-HRMS)

— Acute metabolic decompensations

— Dried blood spots

--- Plasma

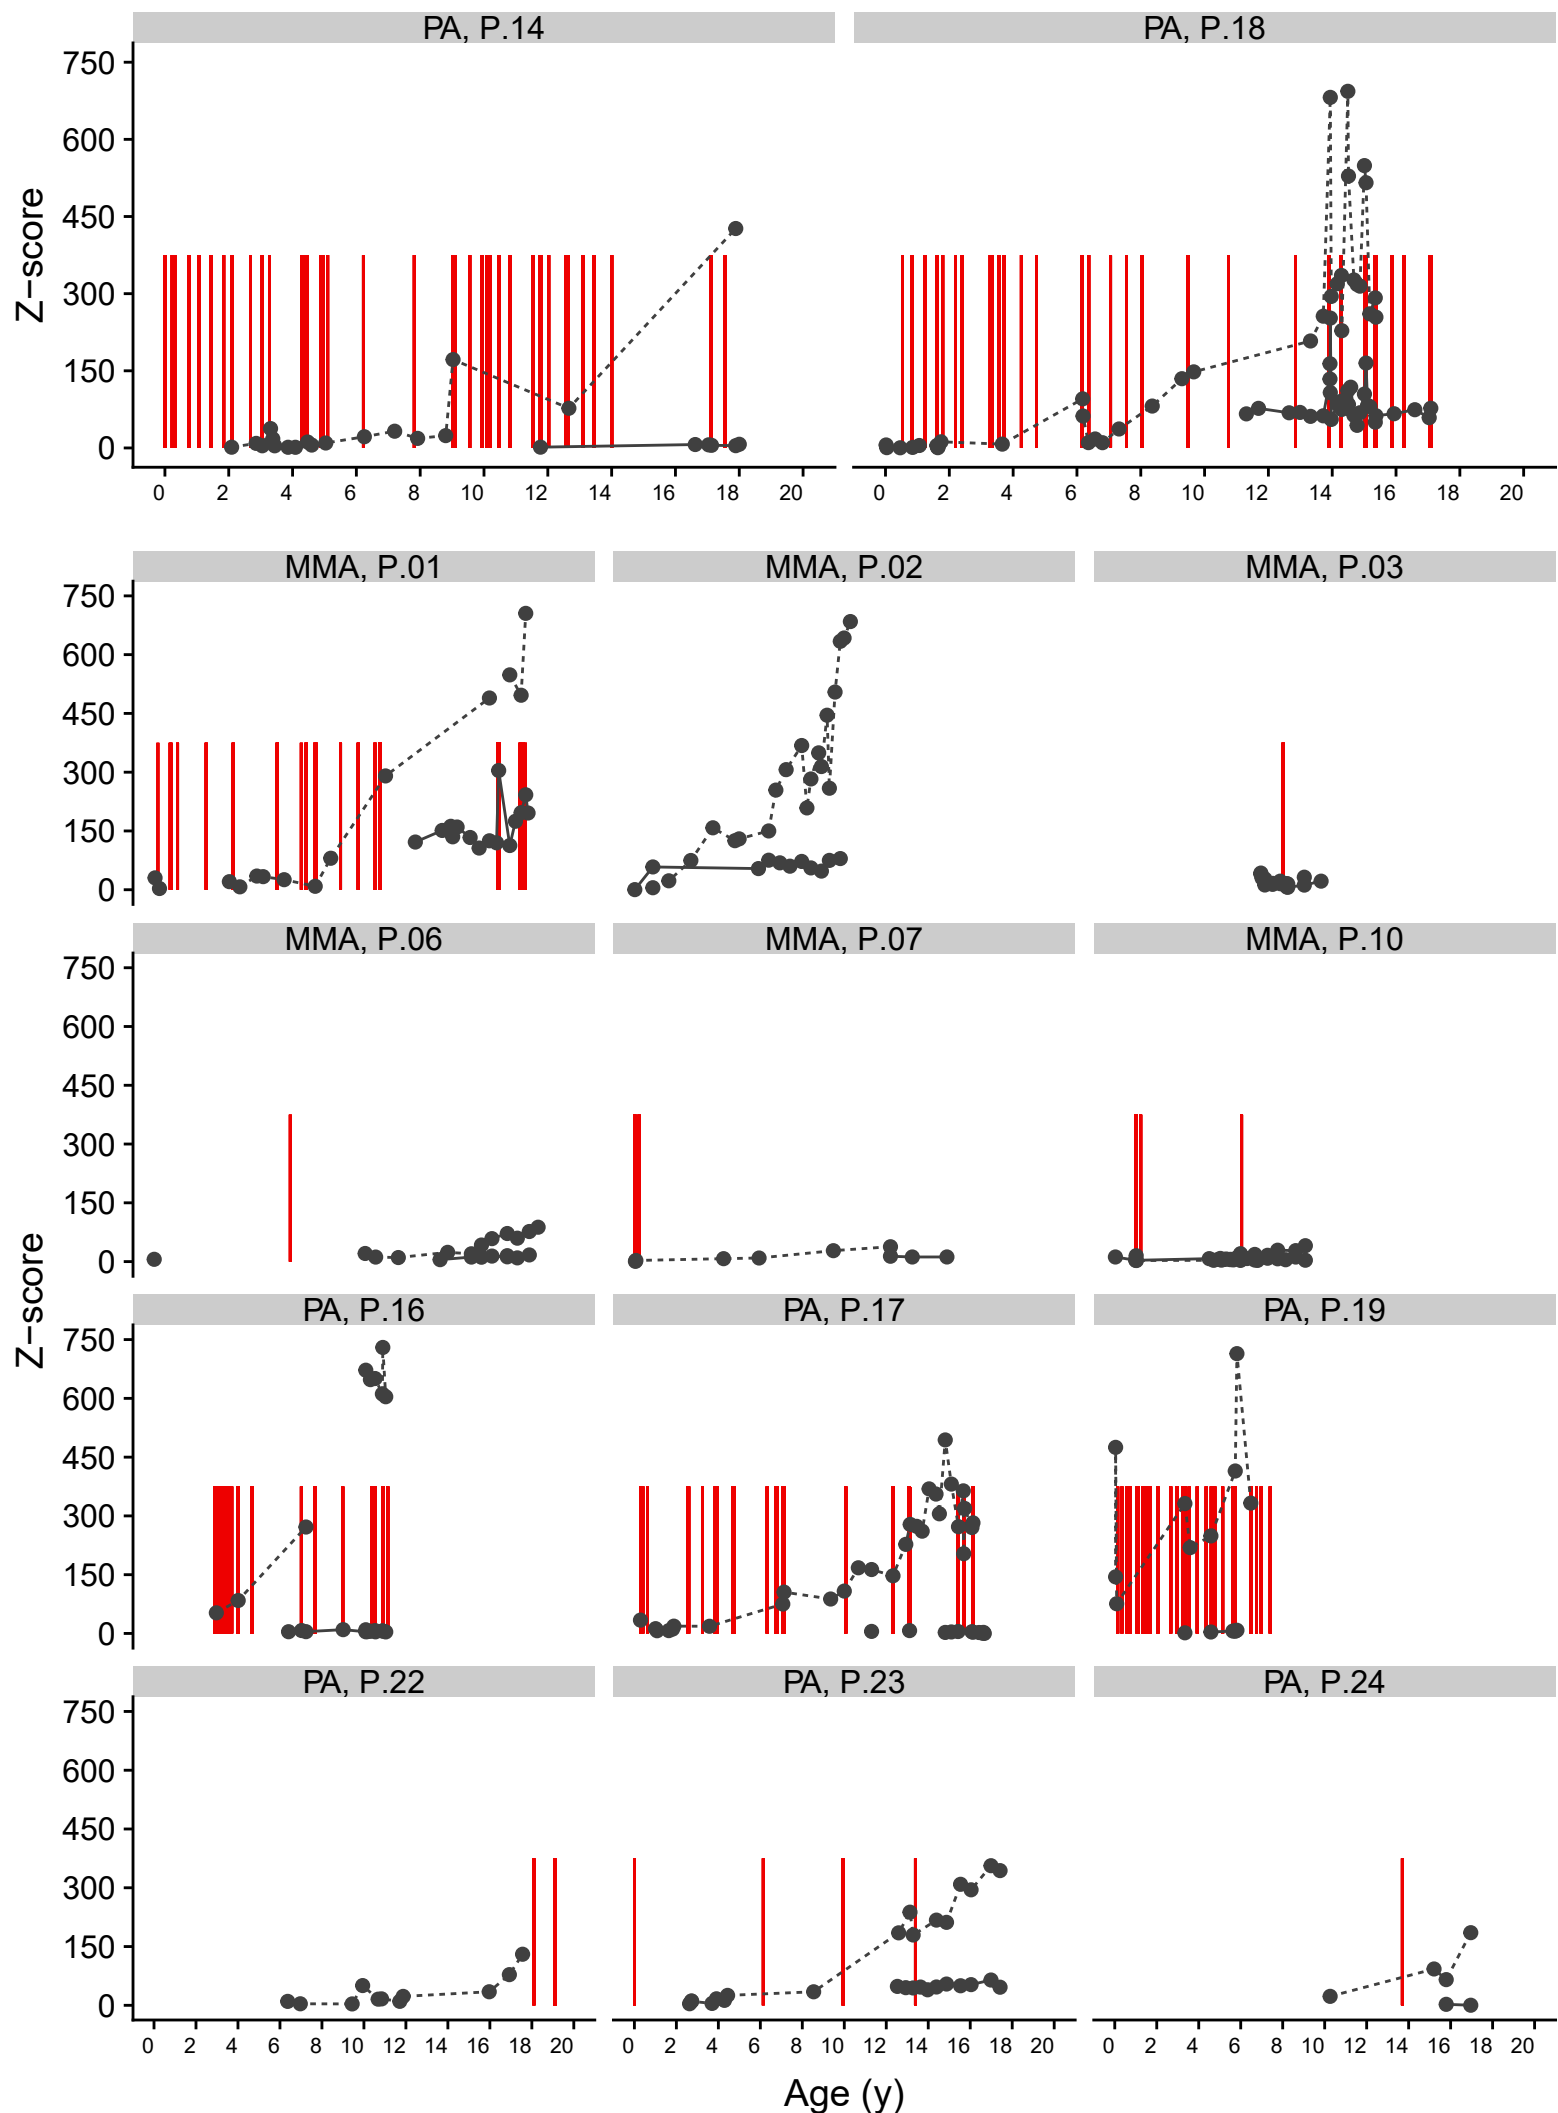

# Supplementary Figure 7

## Propionylglycine (DI-HRMS)

- Acute metabolic decompensations
- Dried blood spots
- Plasma

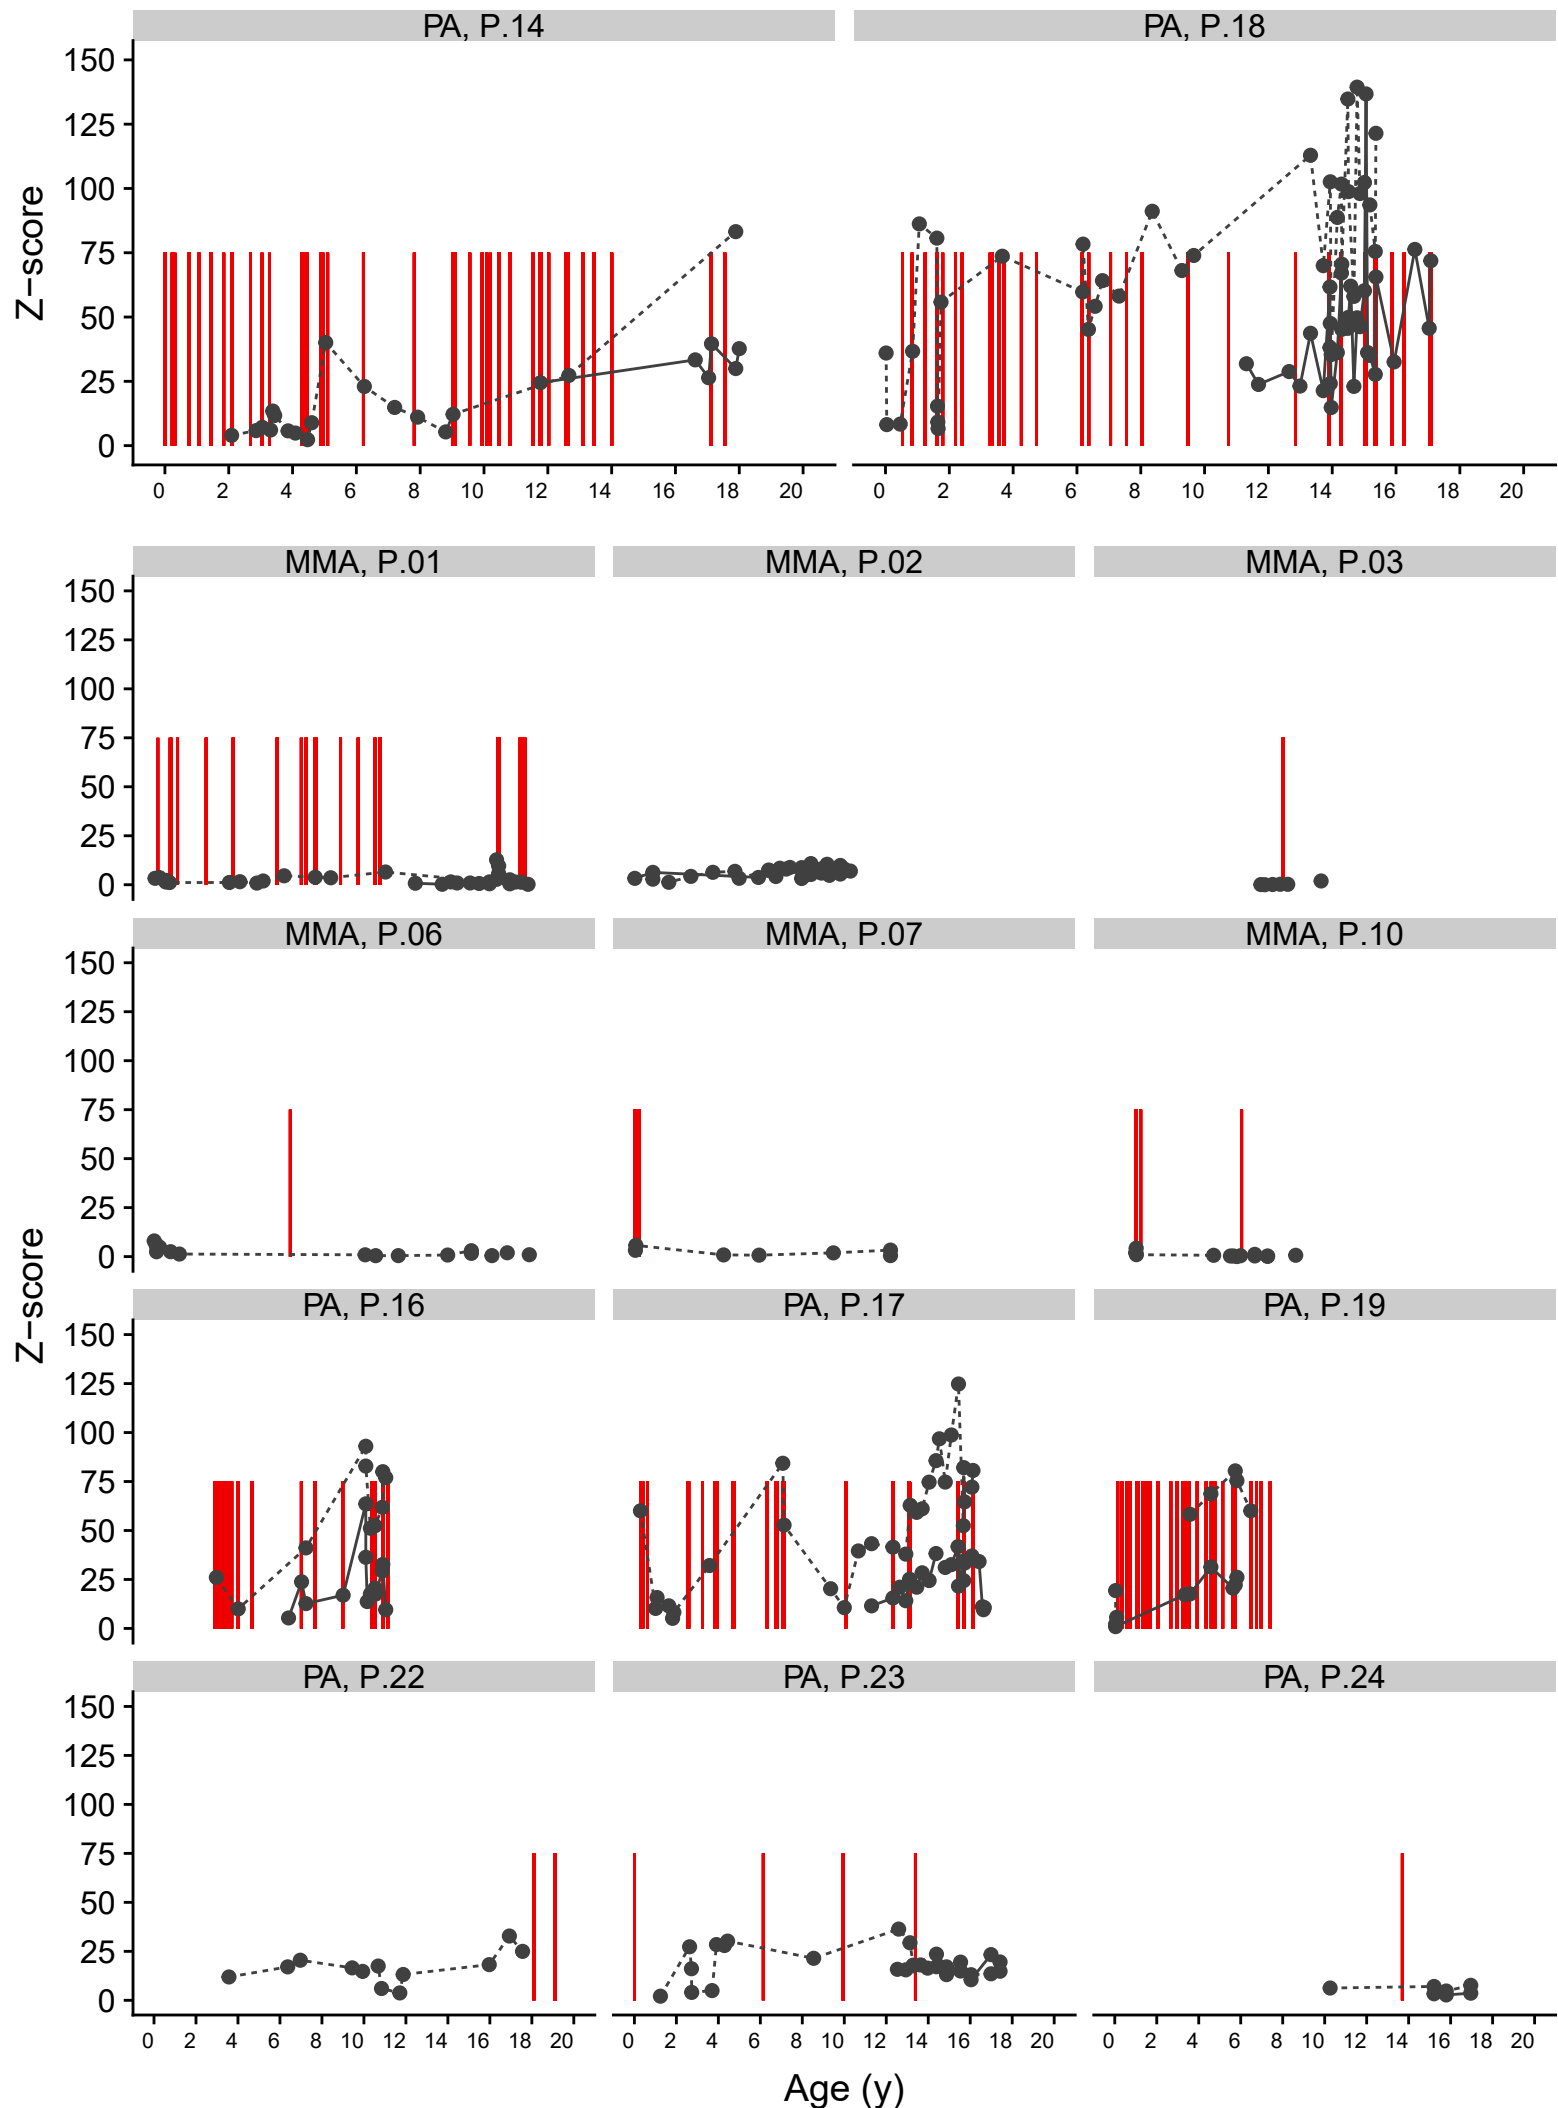

Glycine (PL)

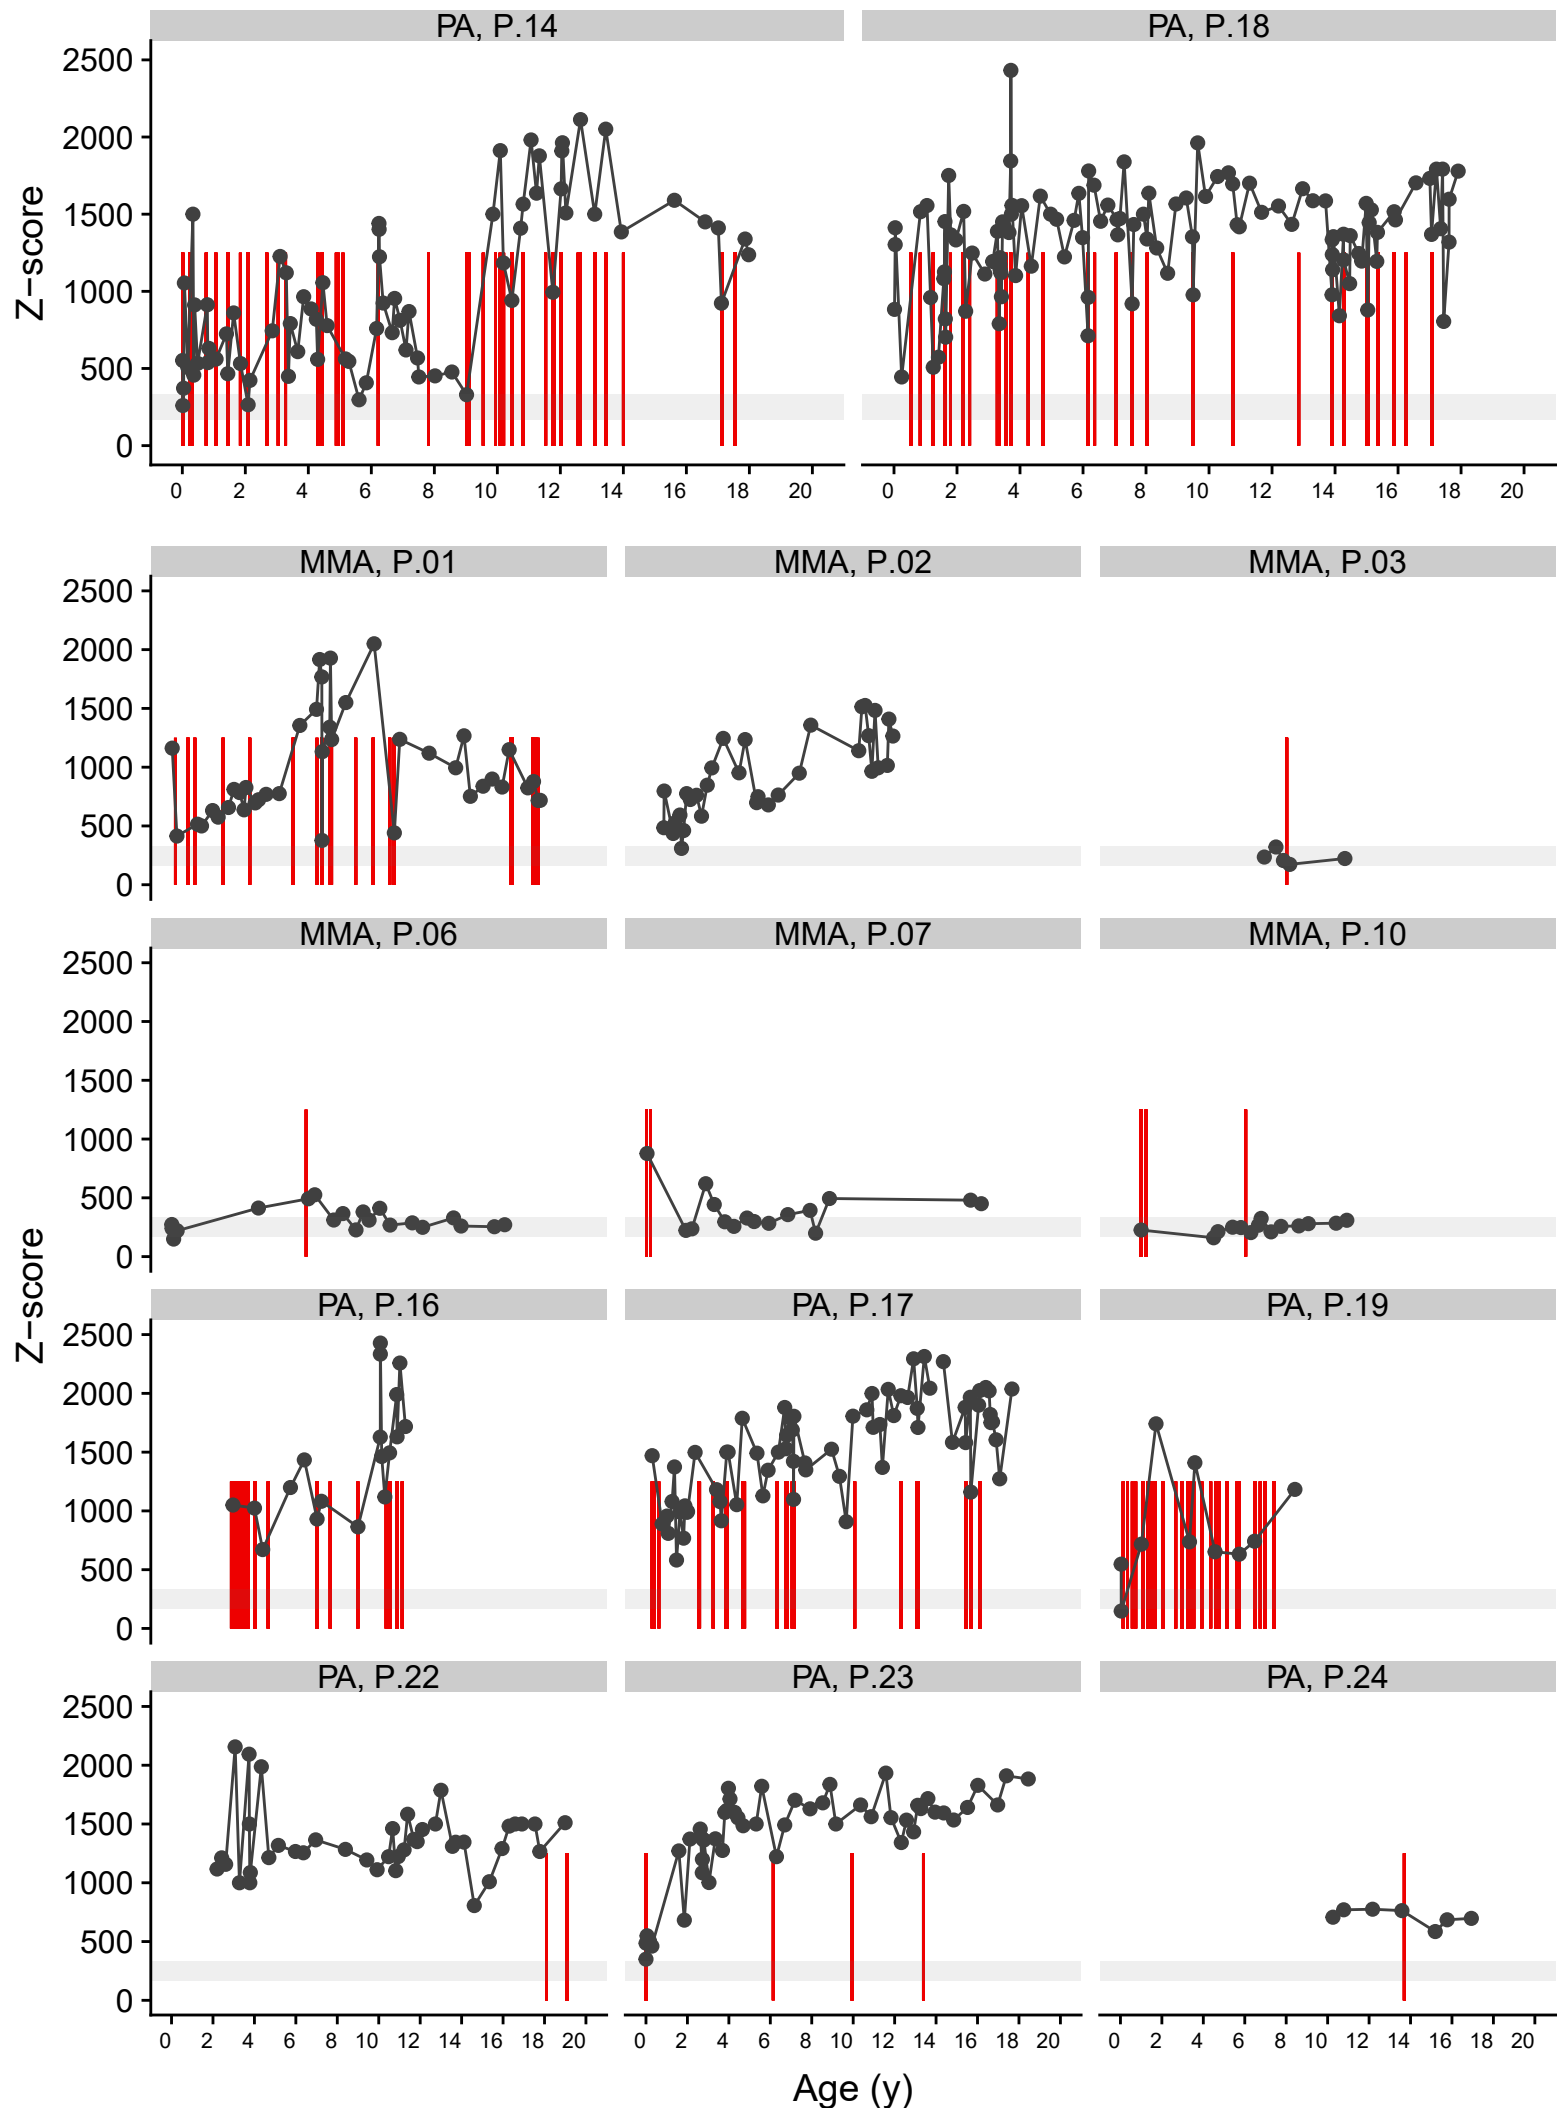

# Supplementary Figure 9

## Glycine (DI-HRMS)

- Acute metabolic decompensations
- Dried blood spots
- - - Plasma

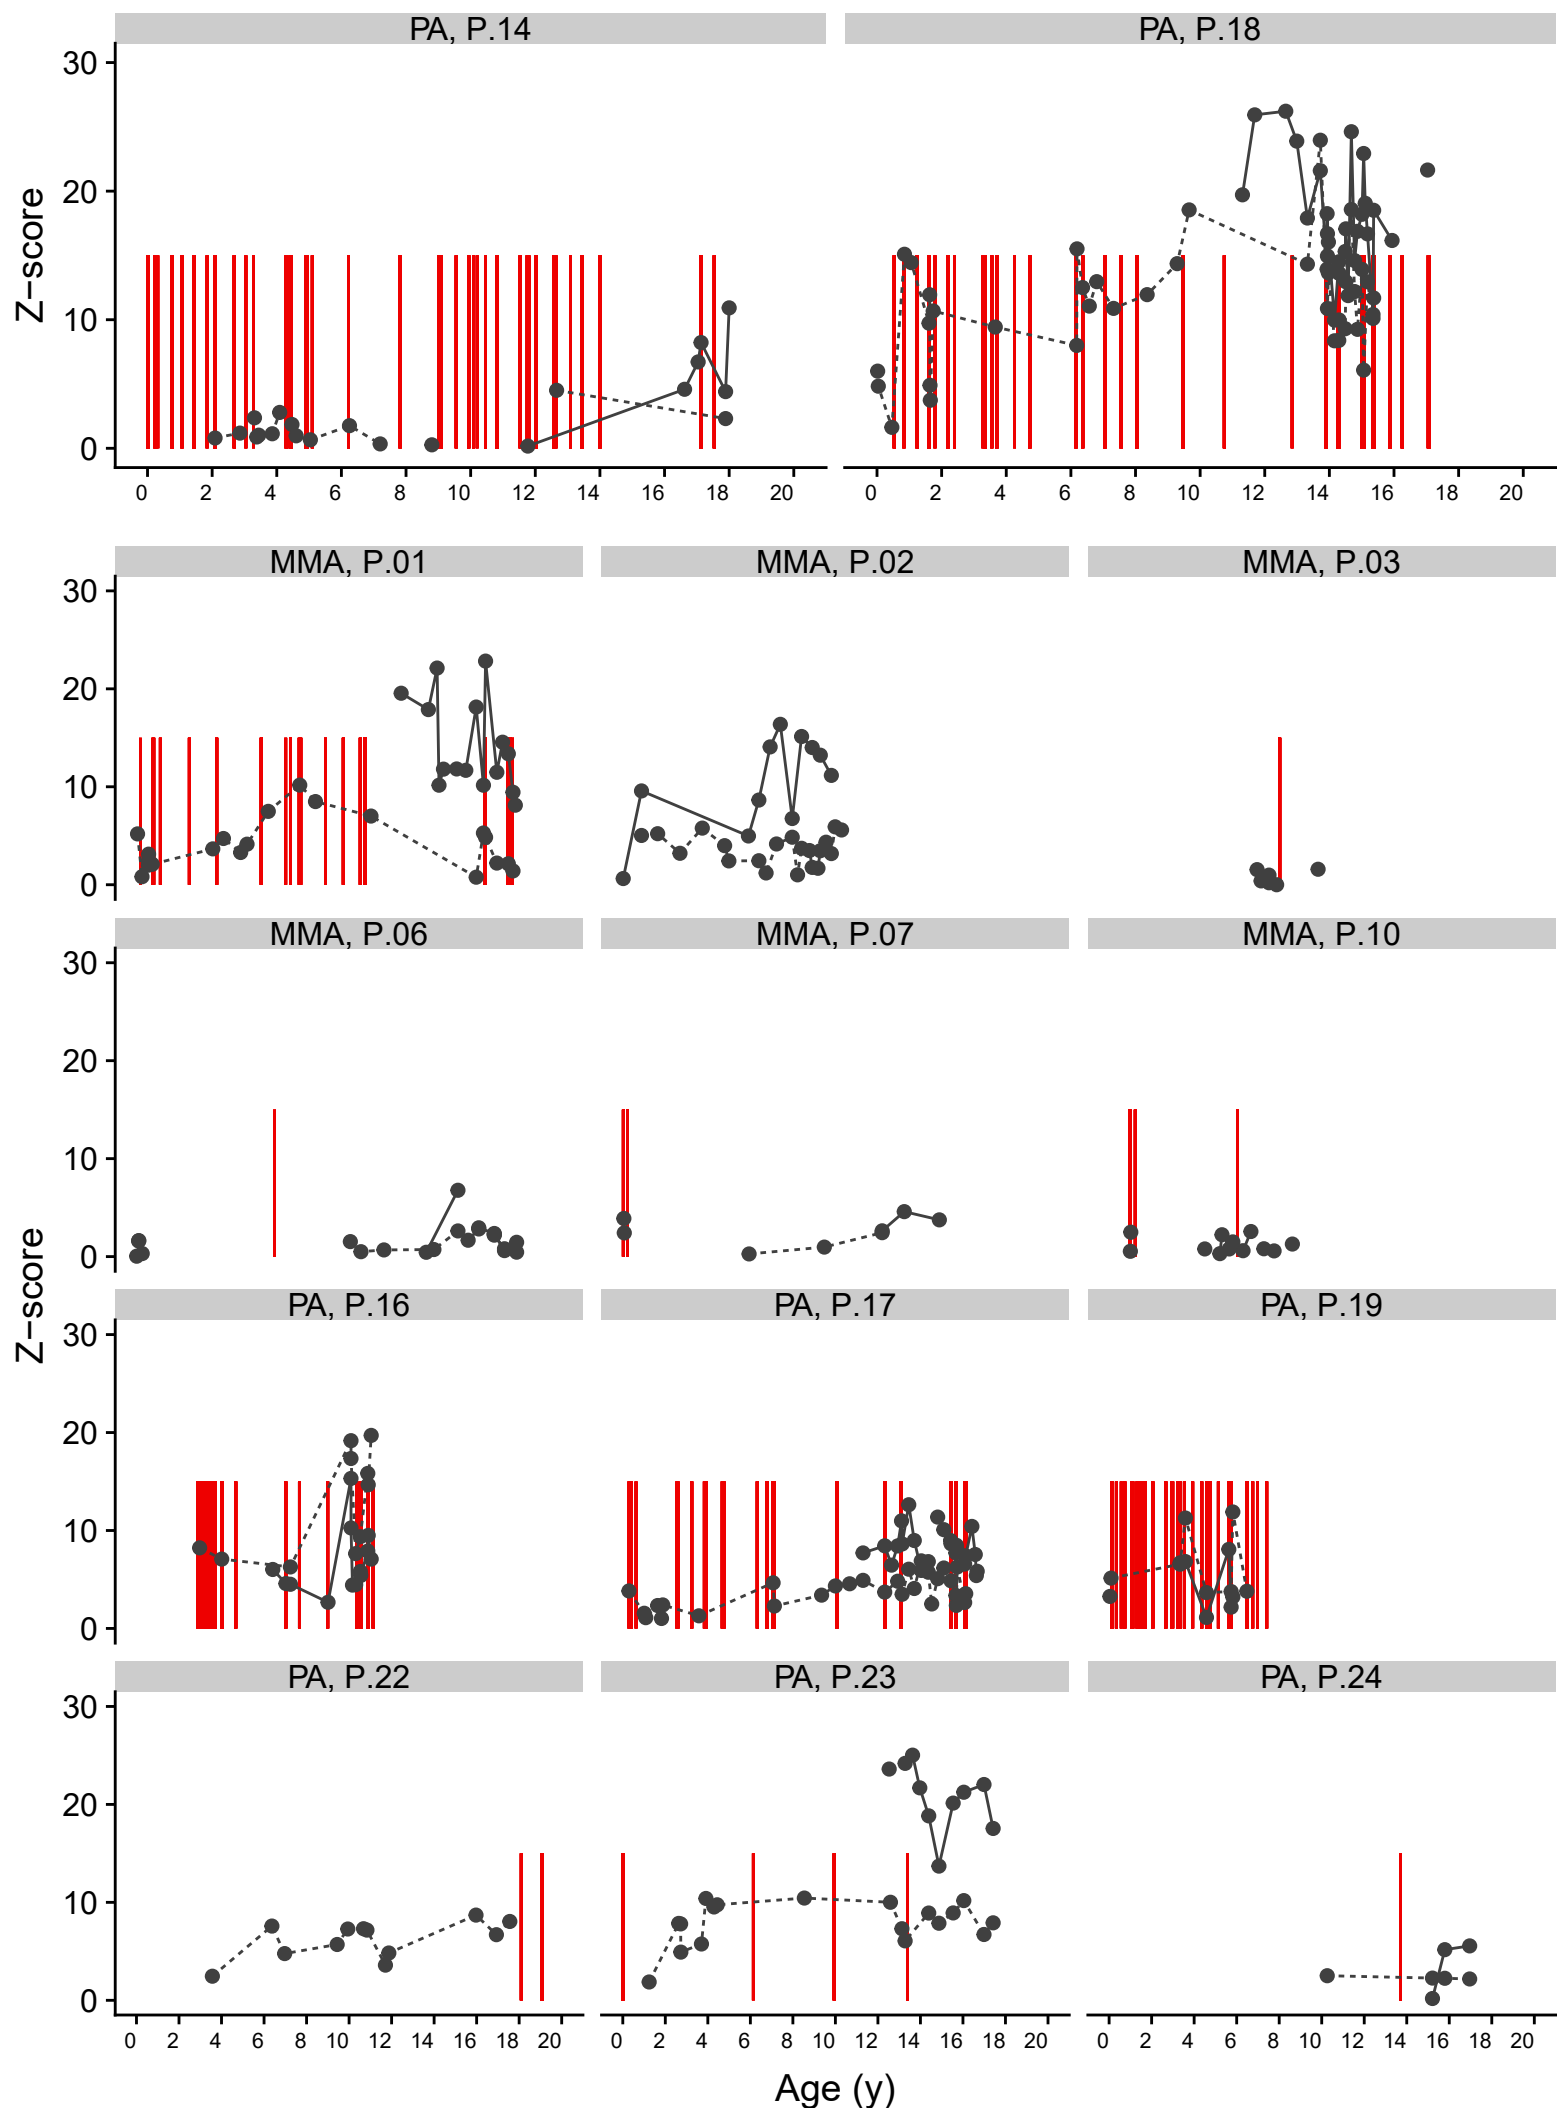

3-Dehydroxycarnitine (DI-HRMS)

- Acute metabolic decompensations
- Dried blood spots
- Plasma

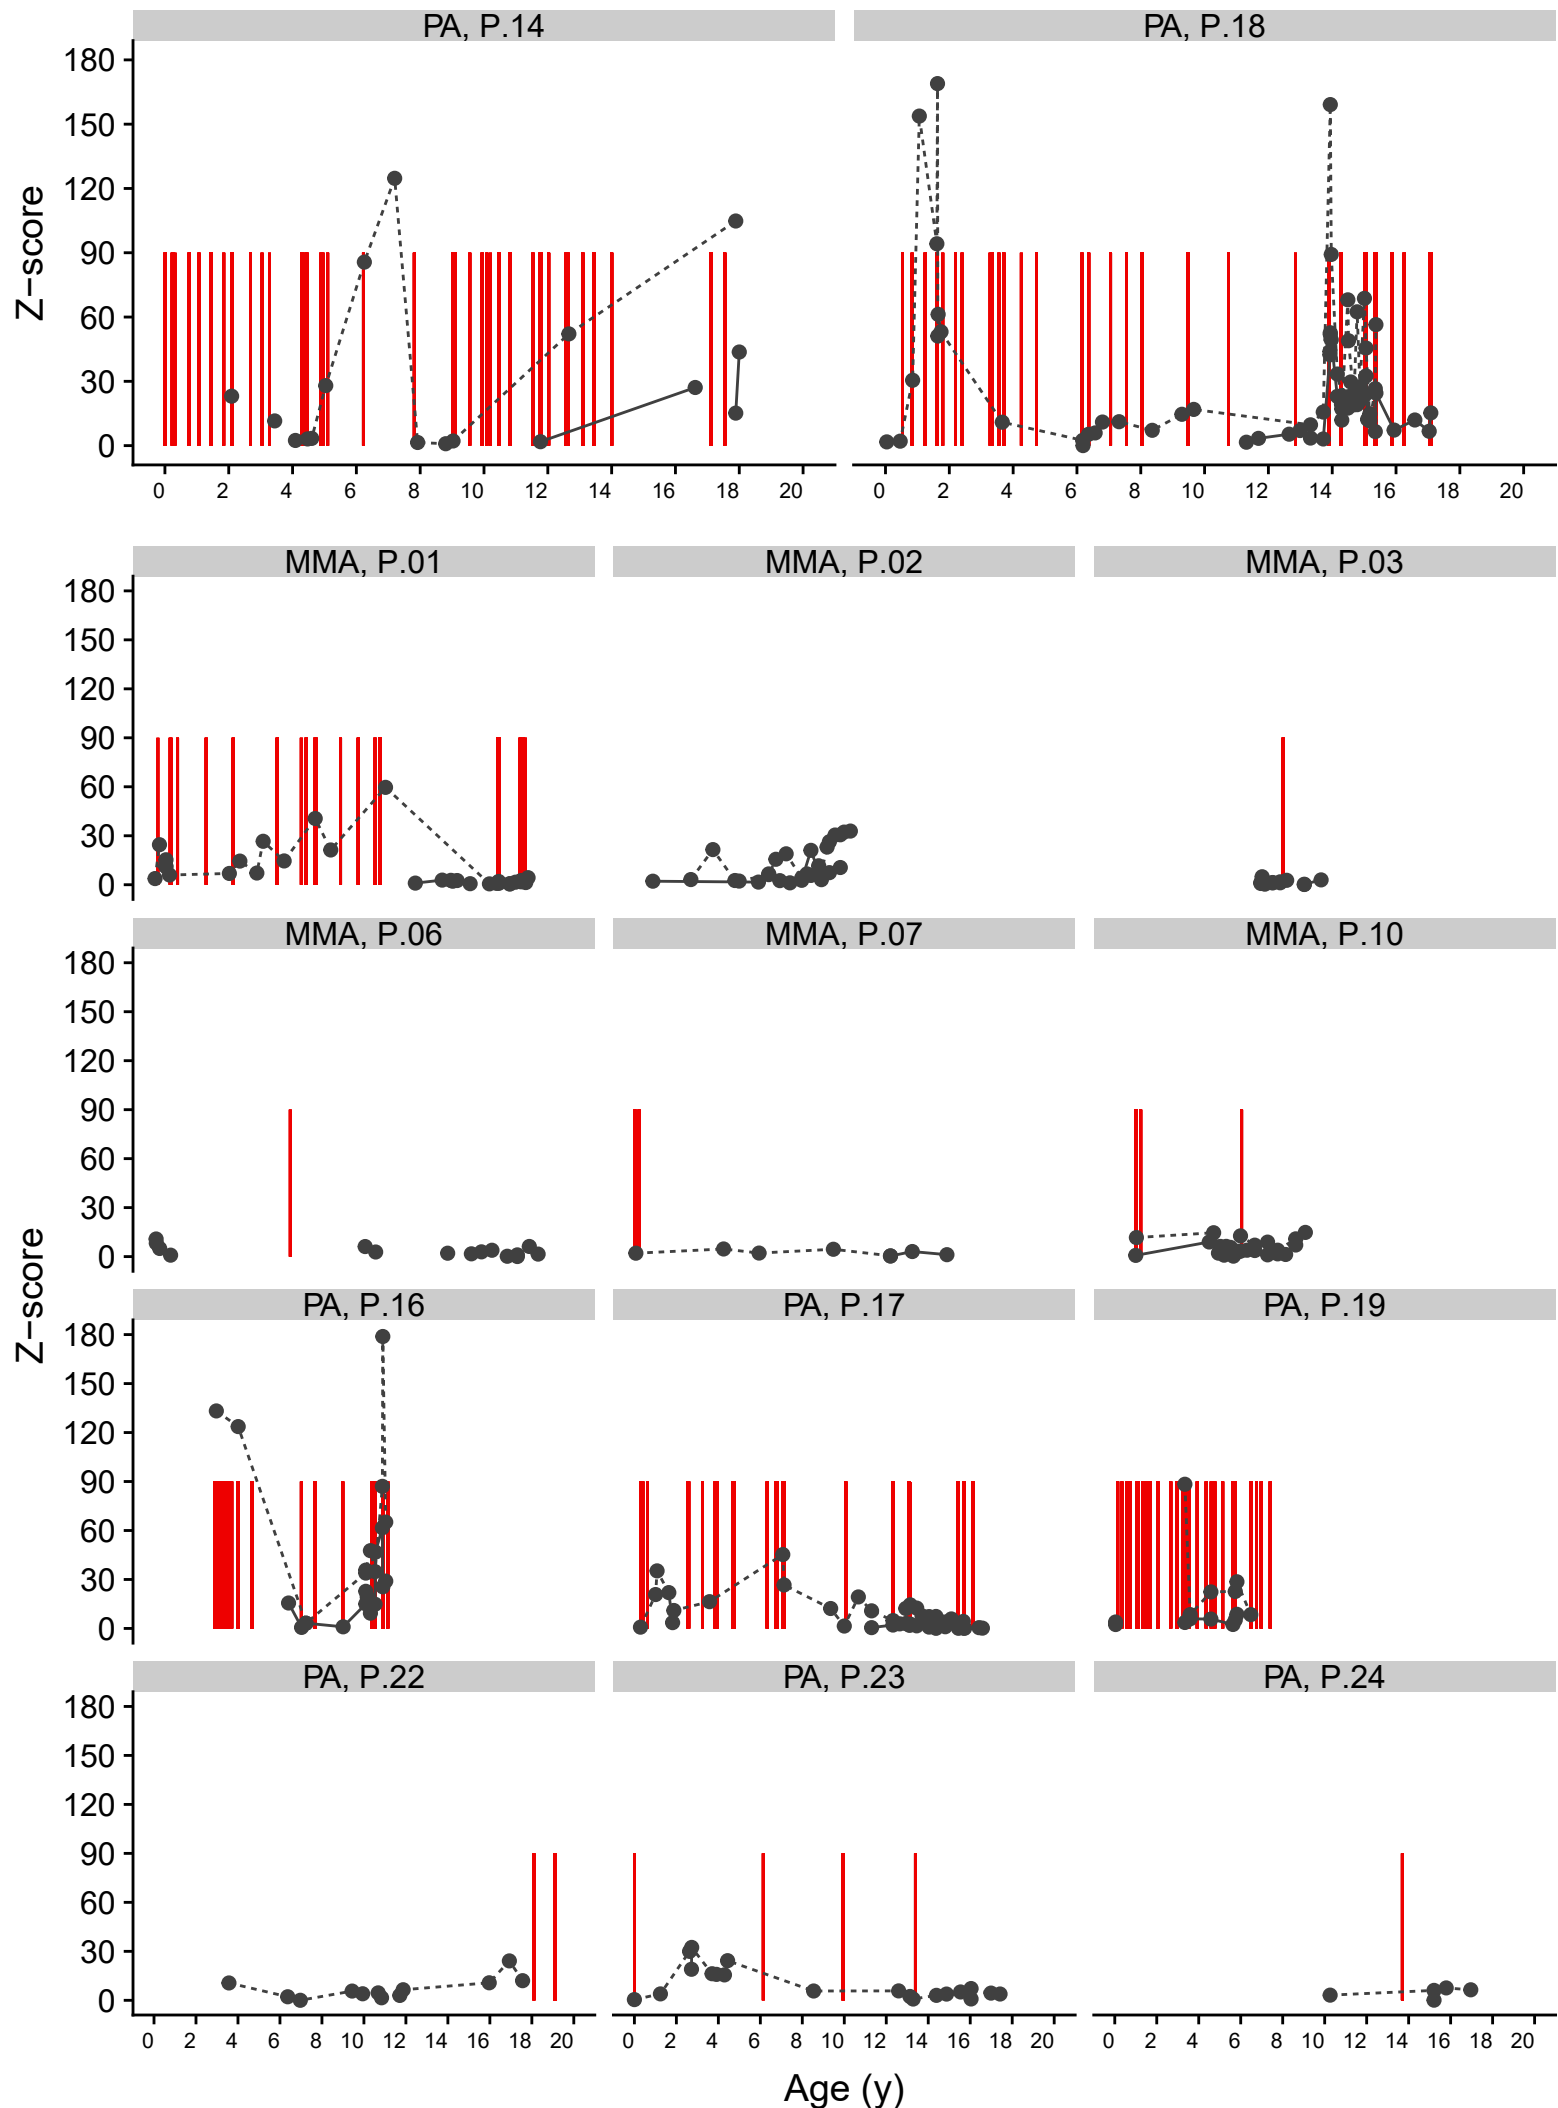

2-Methylcitric acid (DI-HRMS)

- Acute metabolic decompensations
- Dried blood spots
- Plasma

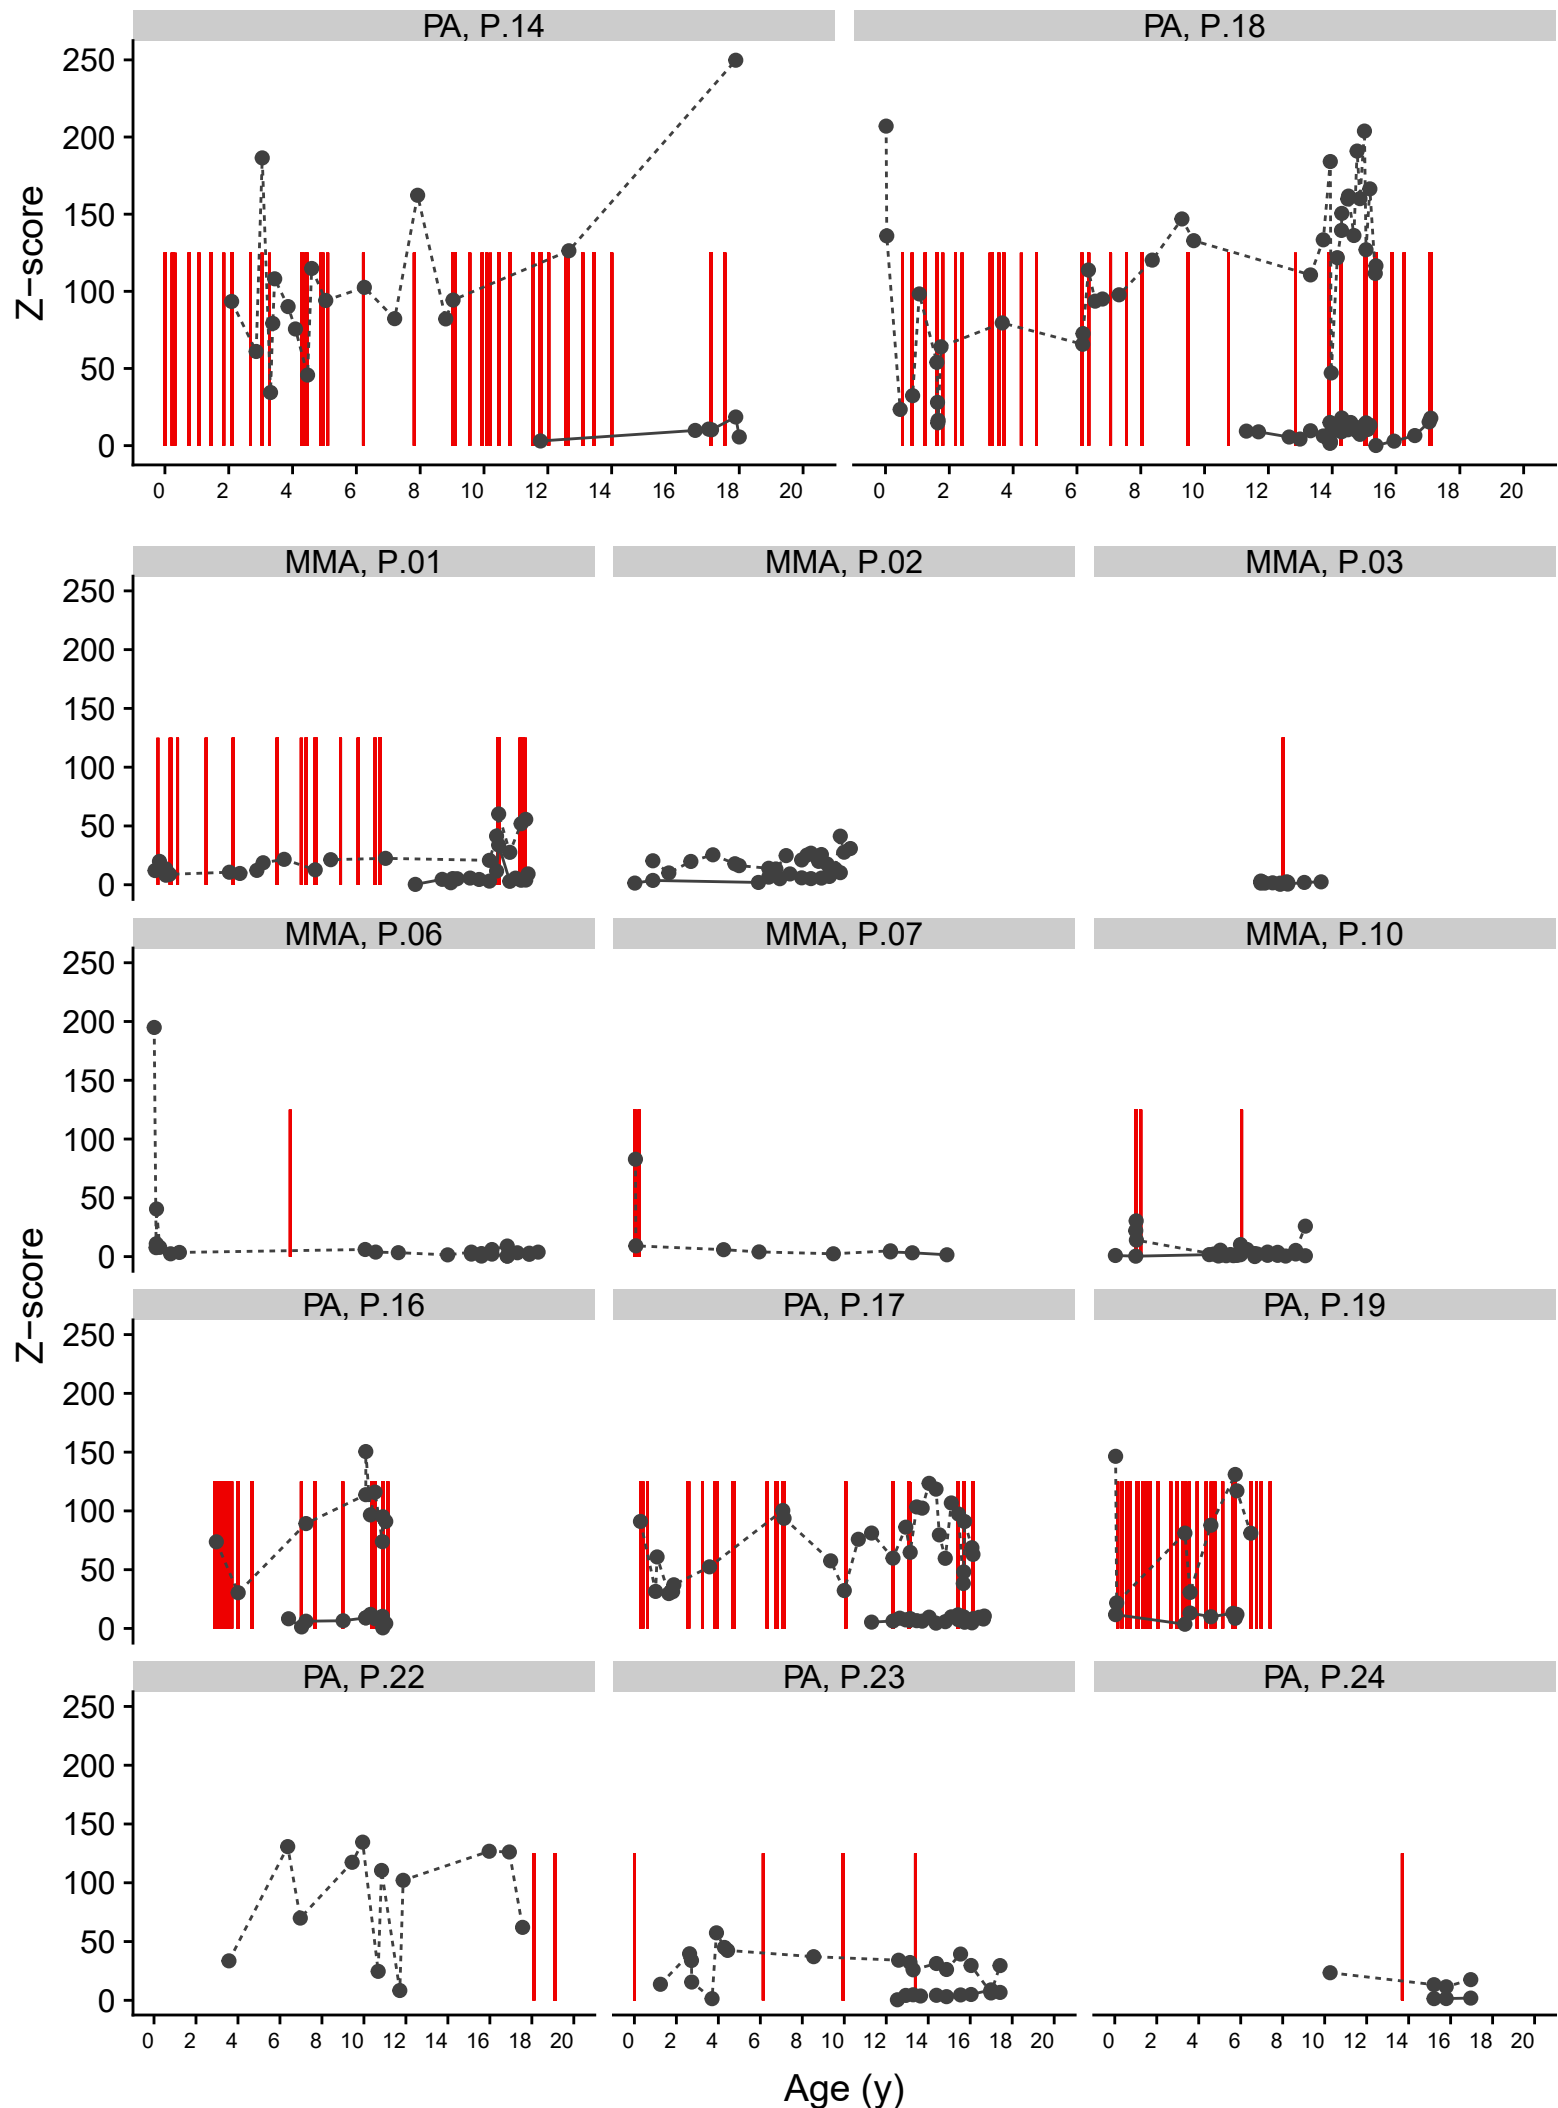

# Supplementary Figure 12

## PLS-DA, VIP-scores and heatmap for MMA samples versus control samples

A) DBS

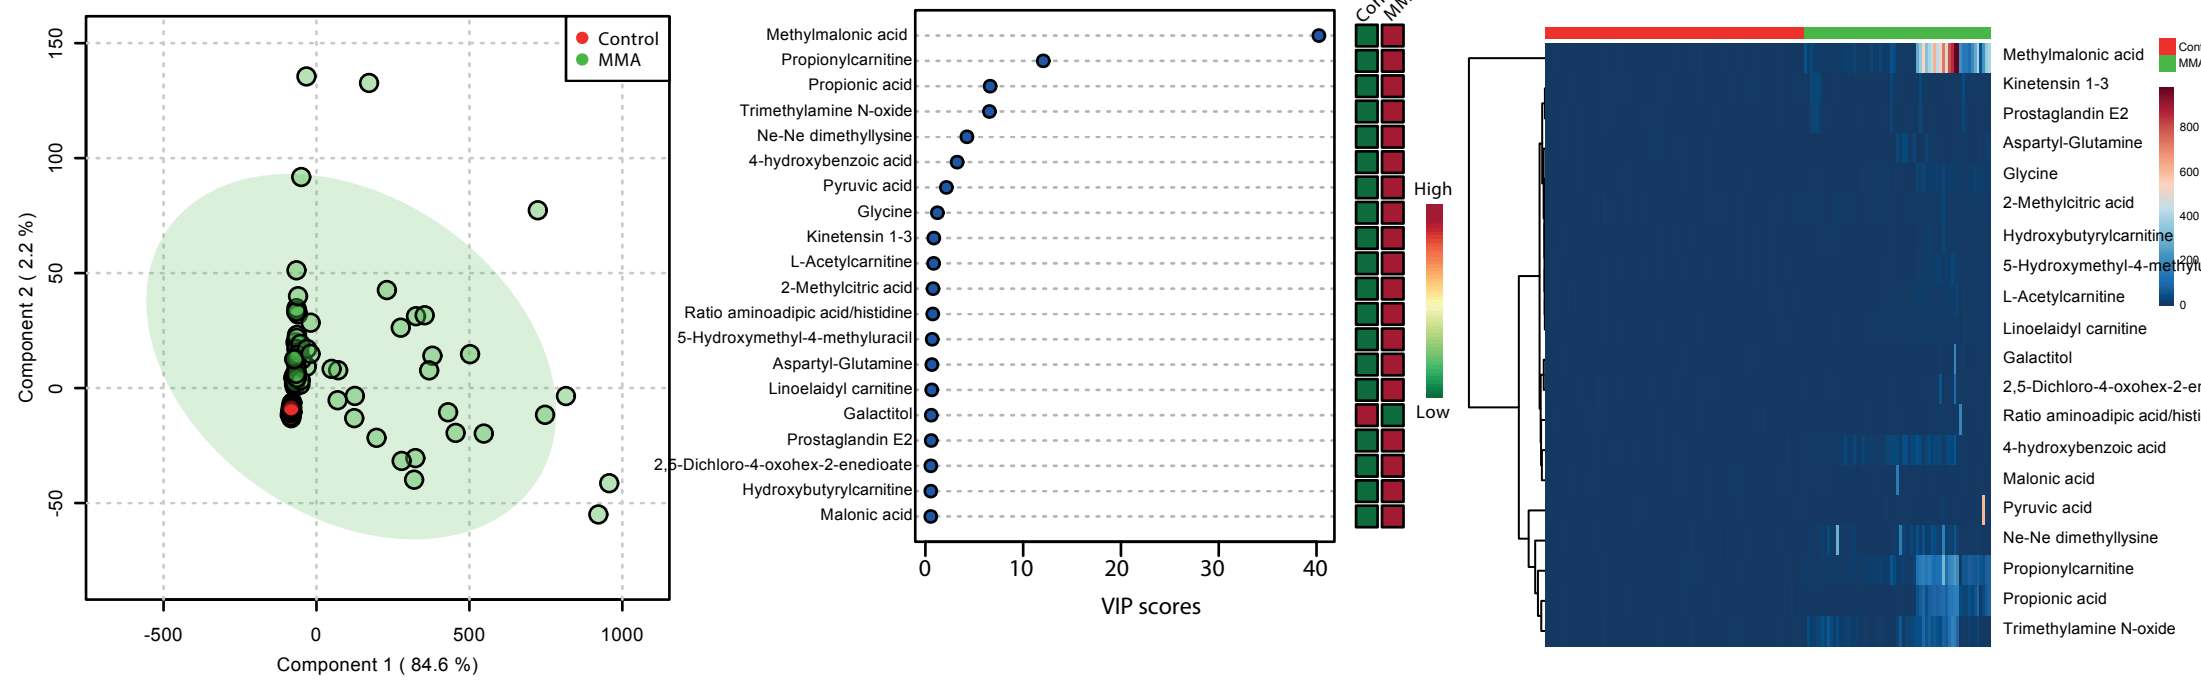

B) Plasma

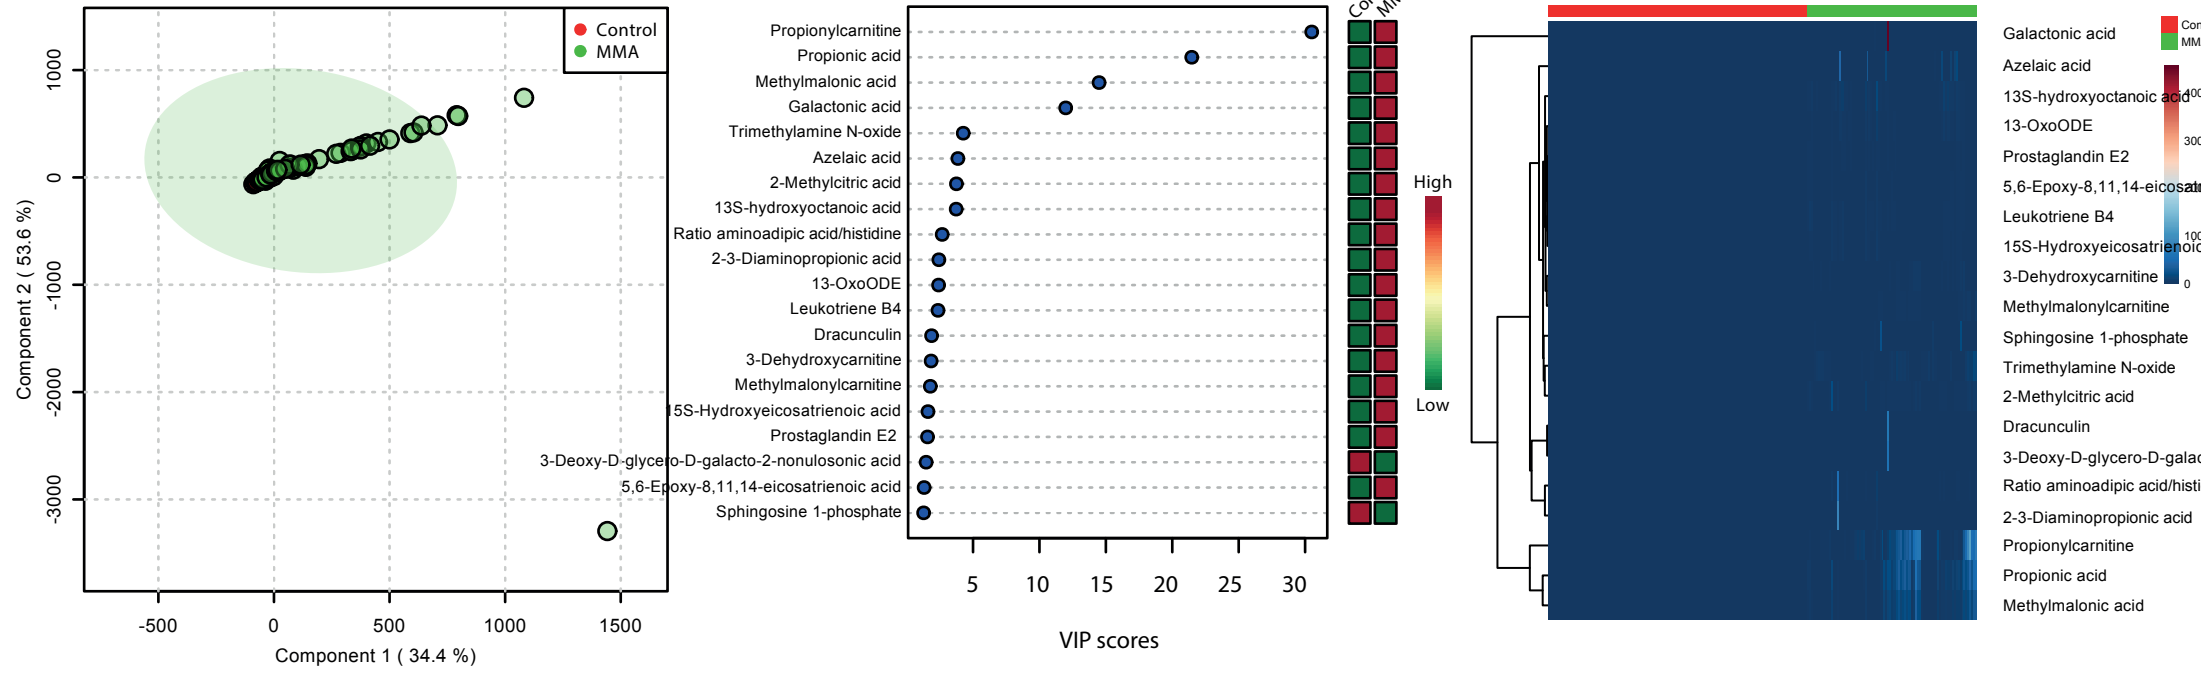



Methylmalonic acid (U)

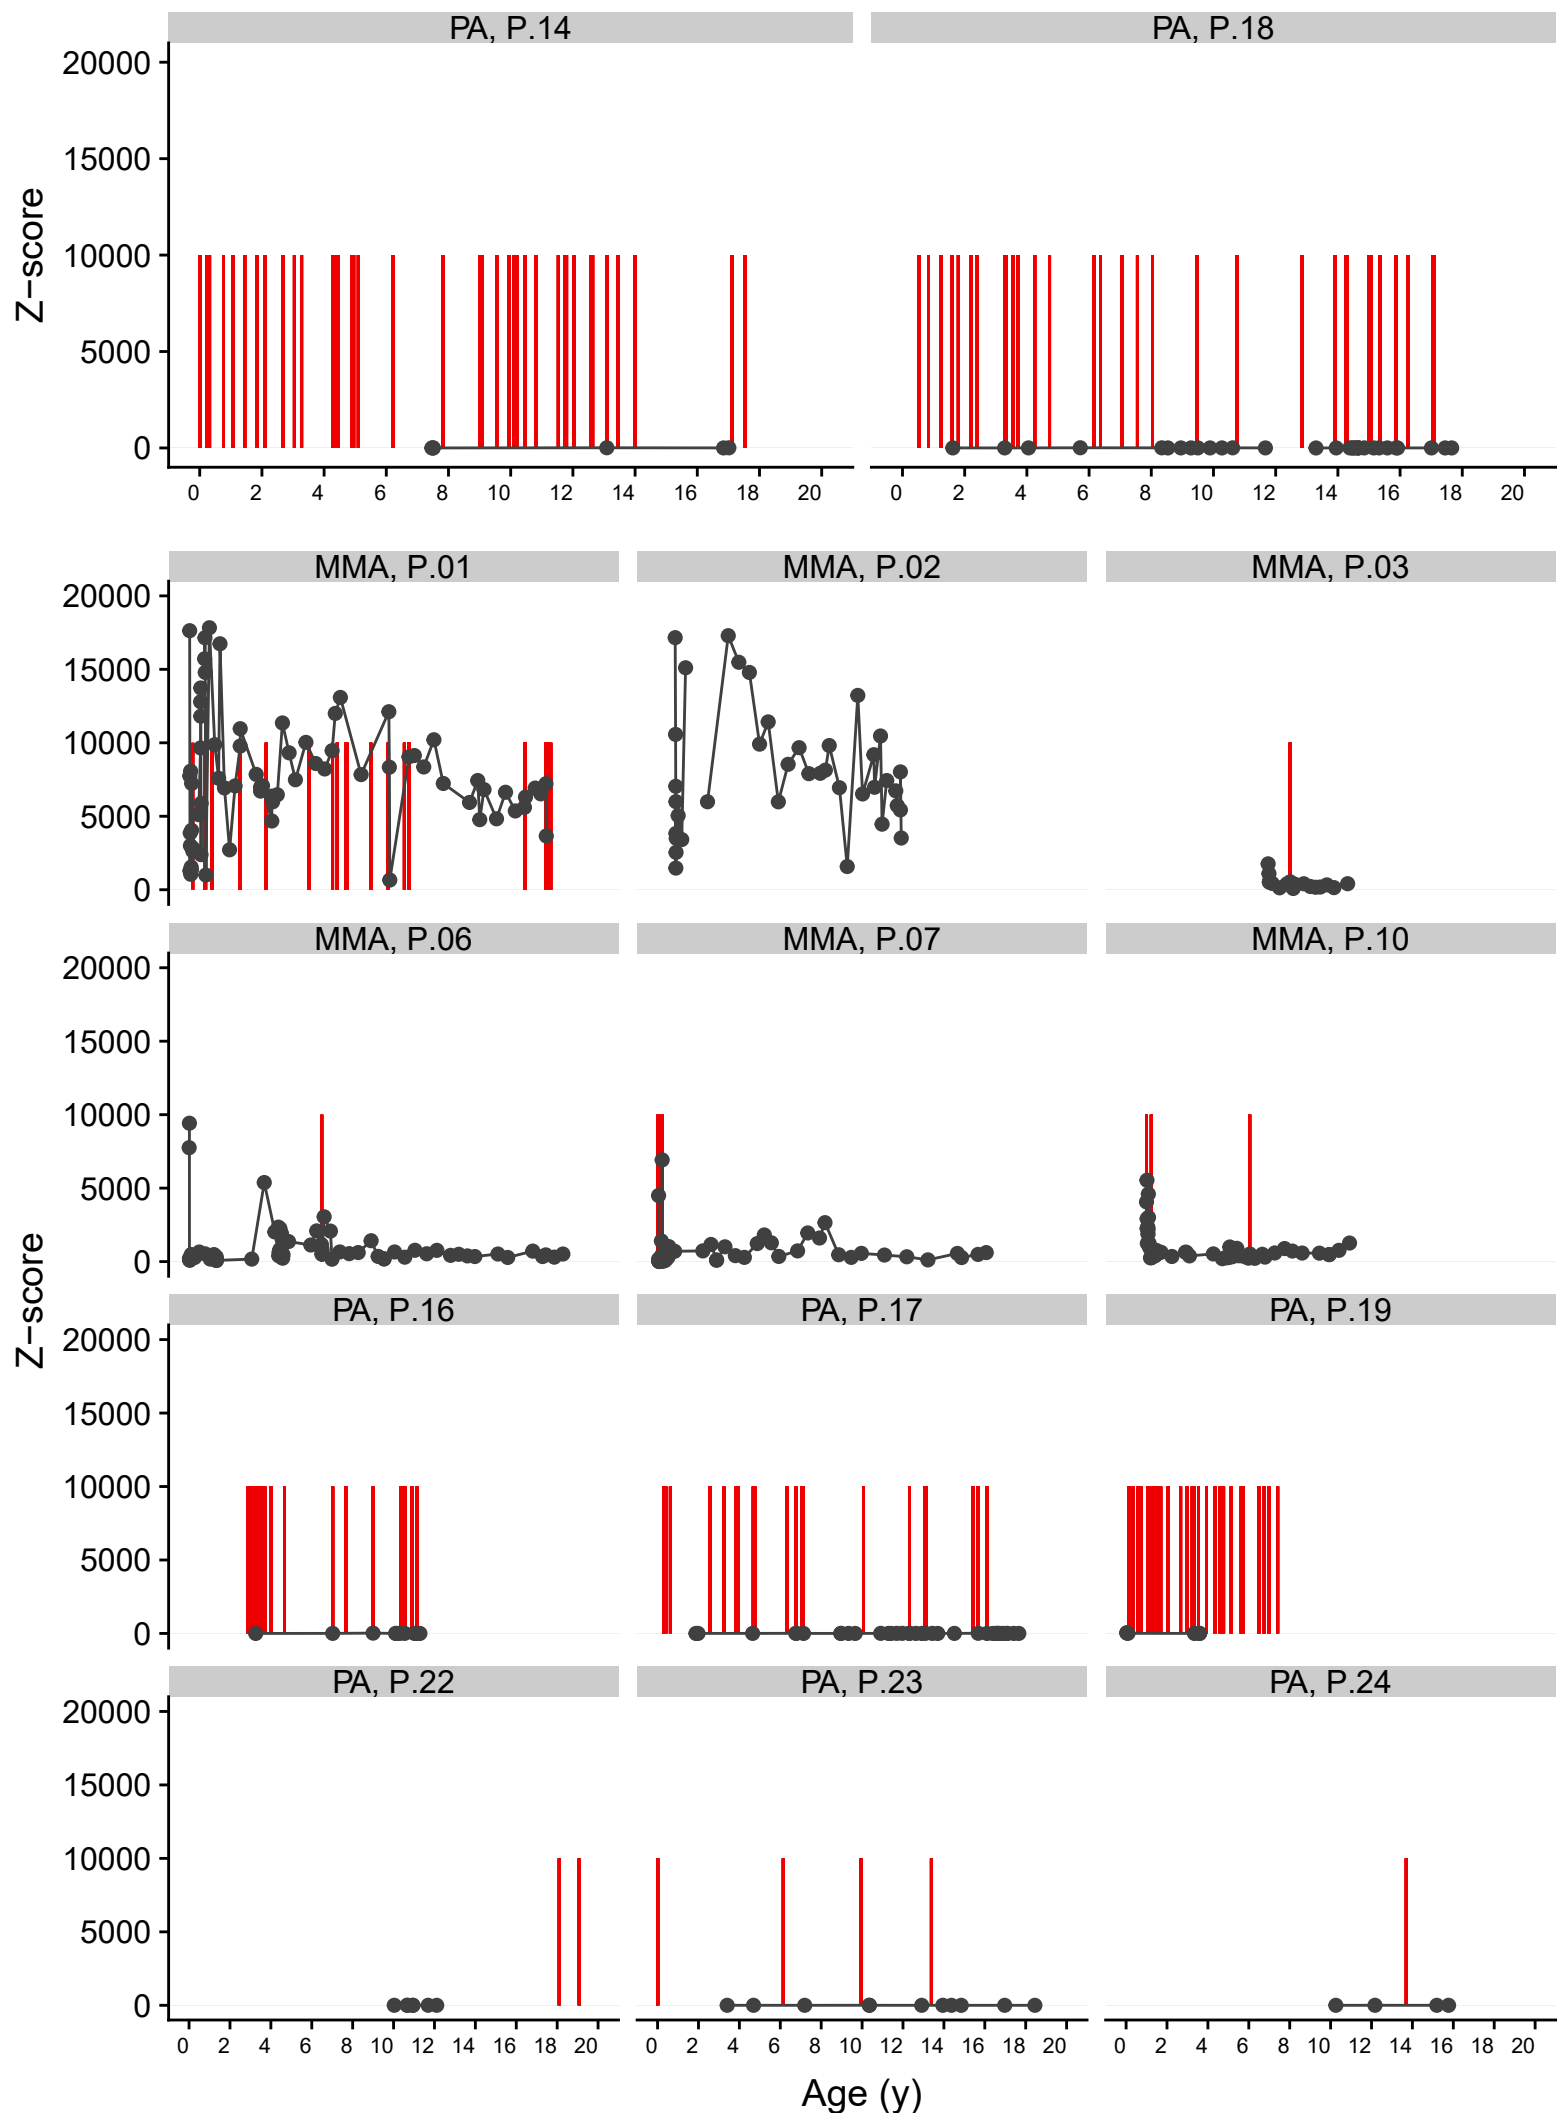

Methylmalonic acid (PL)

— Acute metabolic decompensations  
— Plasma, targeted

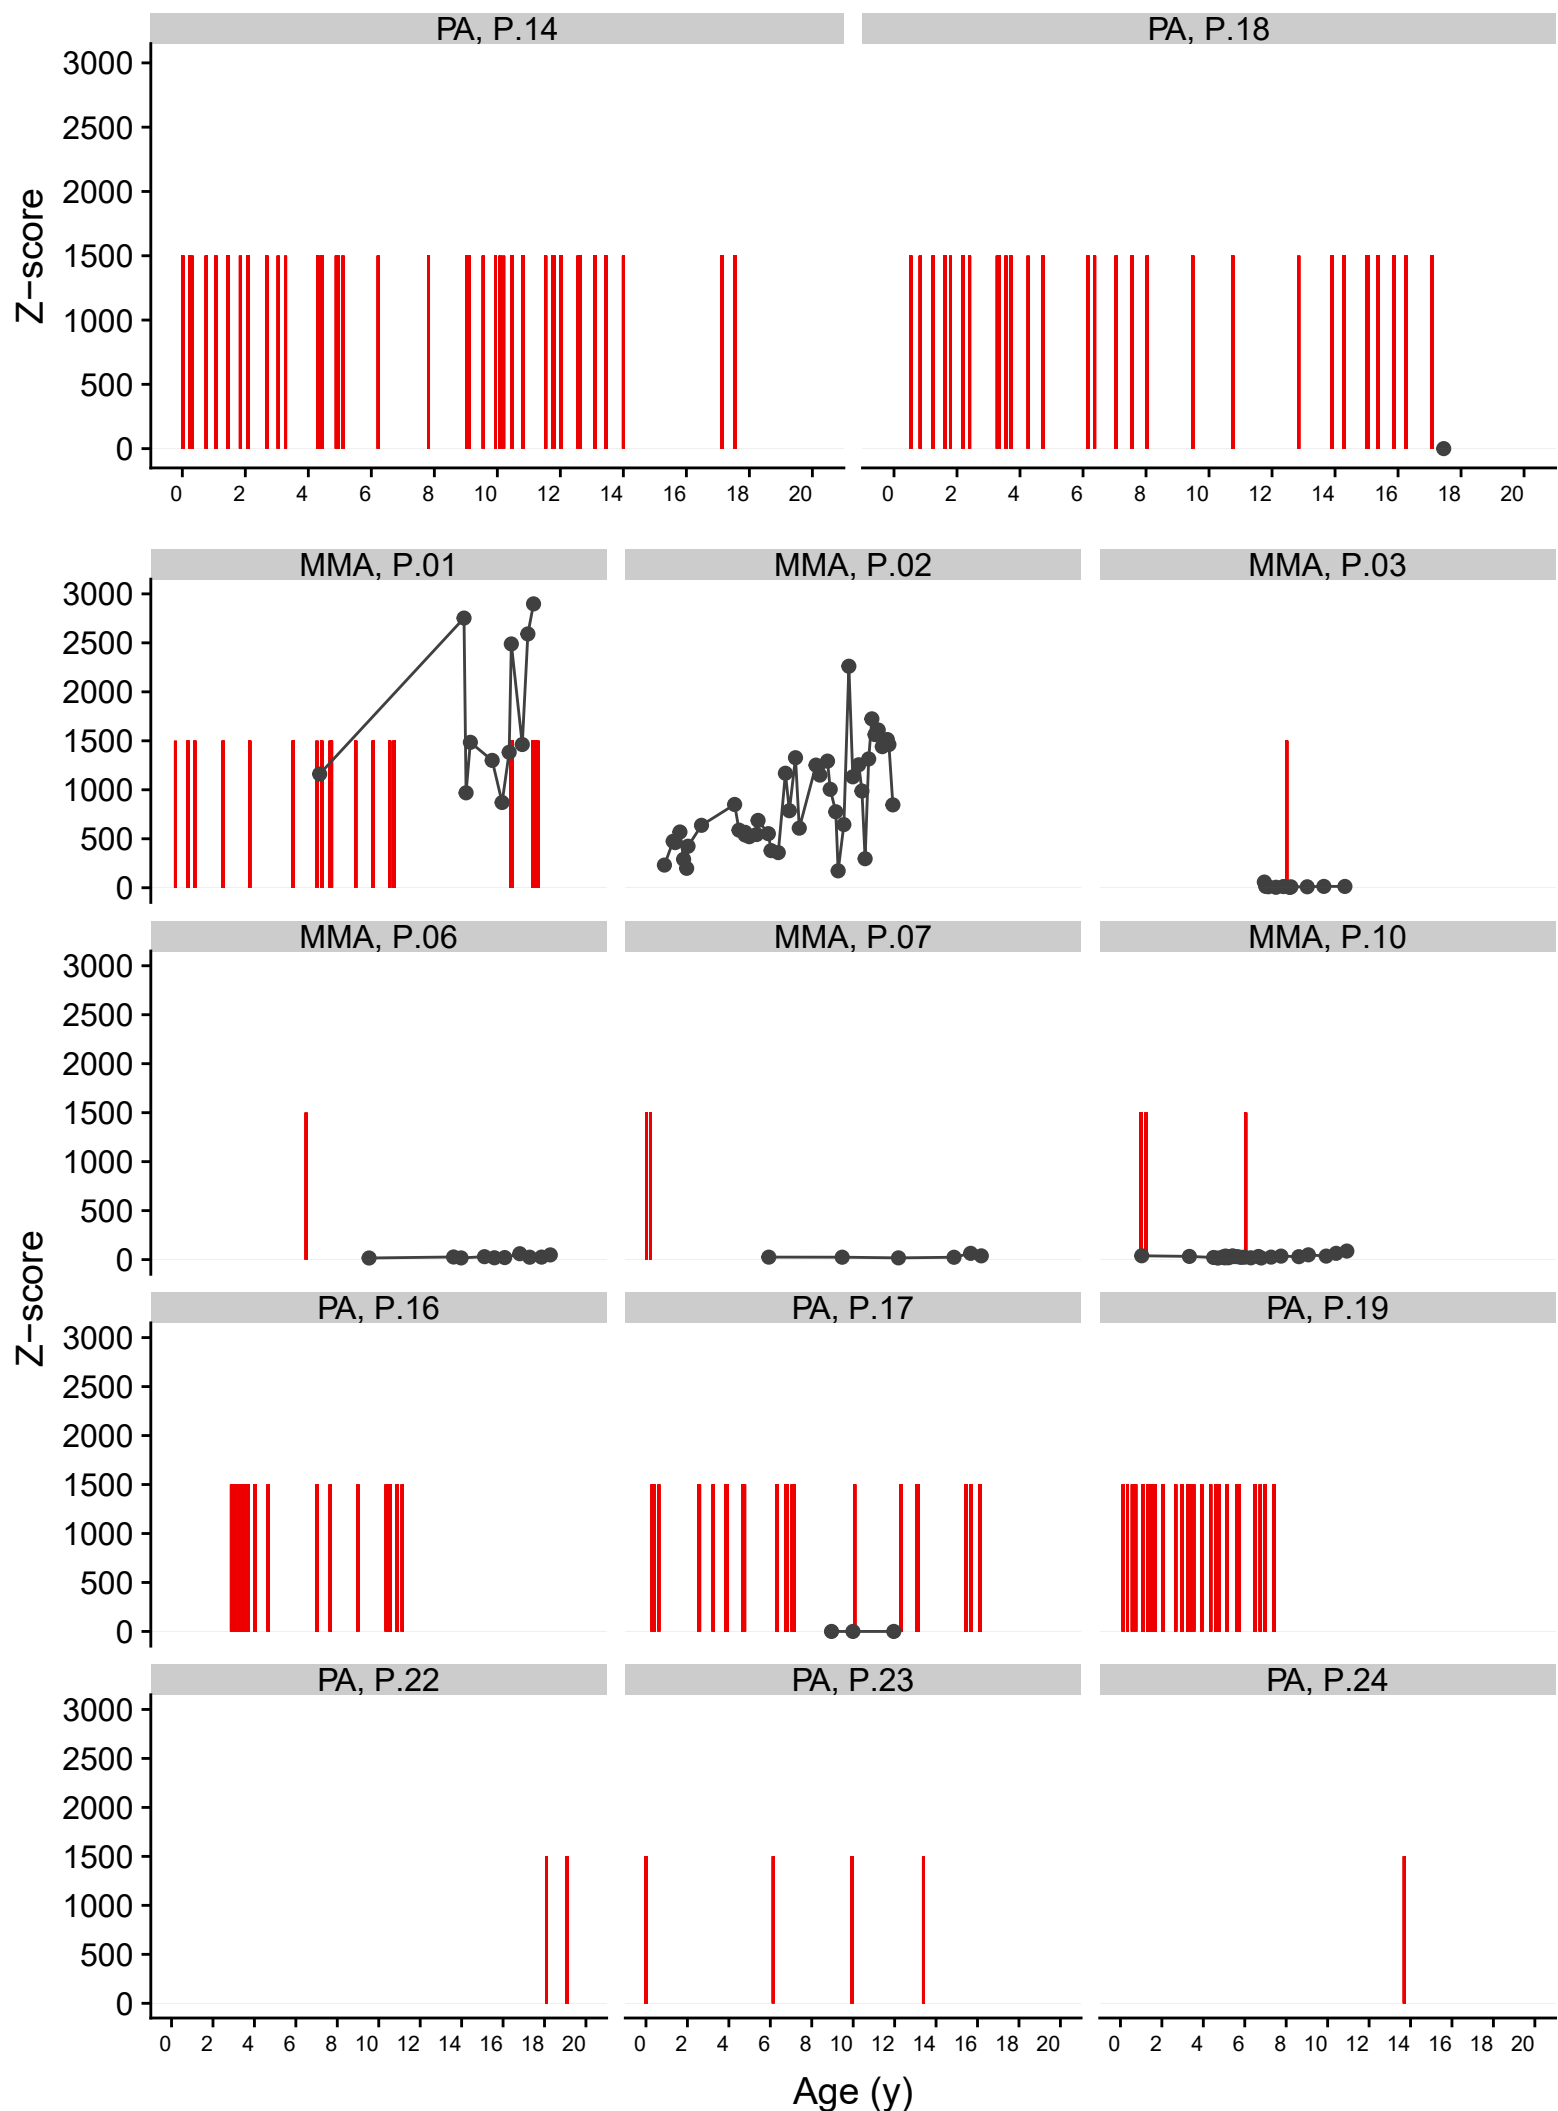

## Methylmalonic acid (DI-HRMS)

— Acute metabolic decompensations  
— Dried blood spots  
- - - Plasma

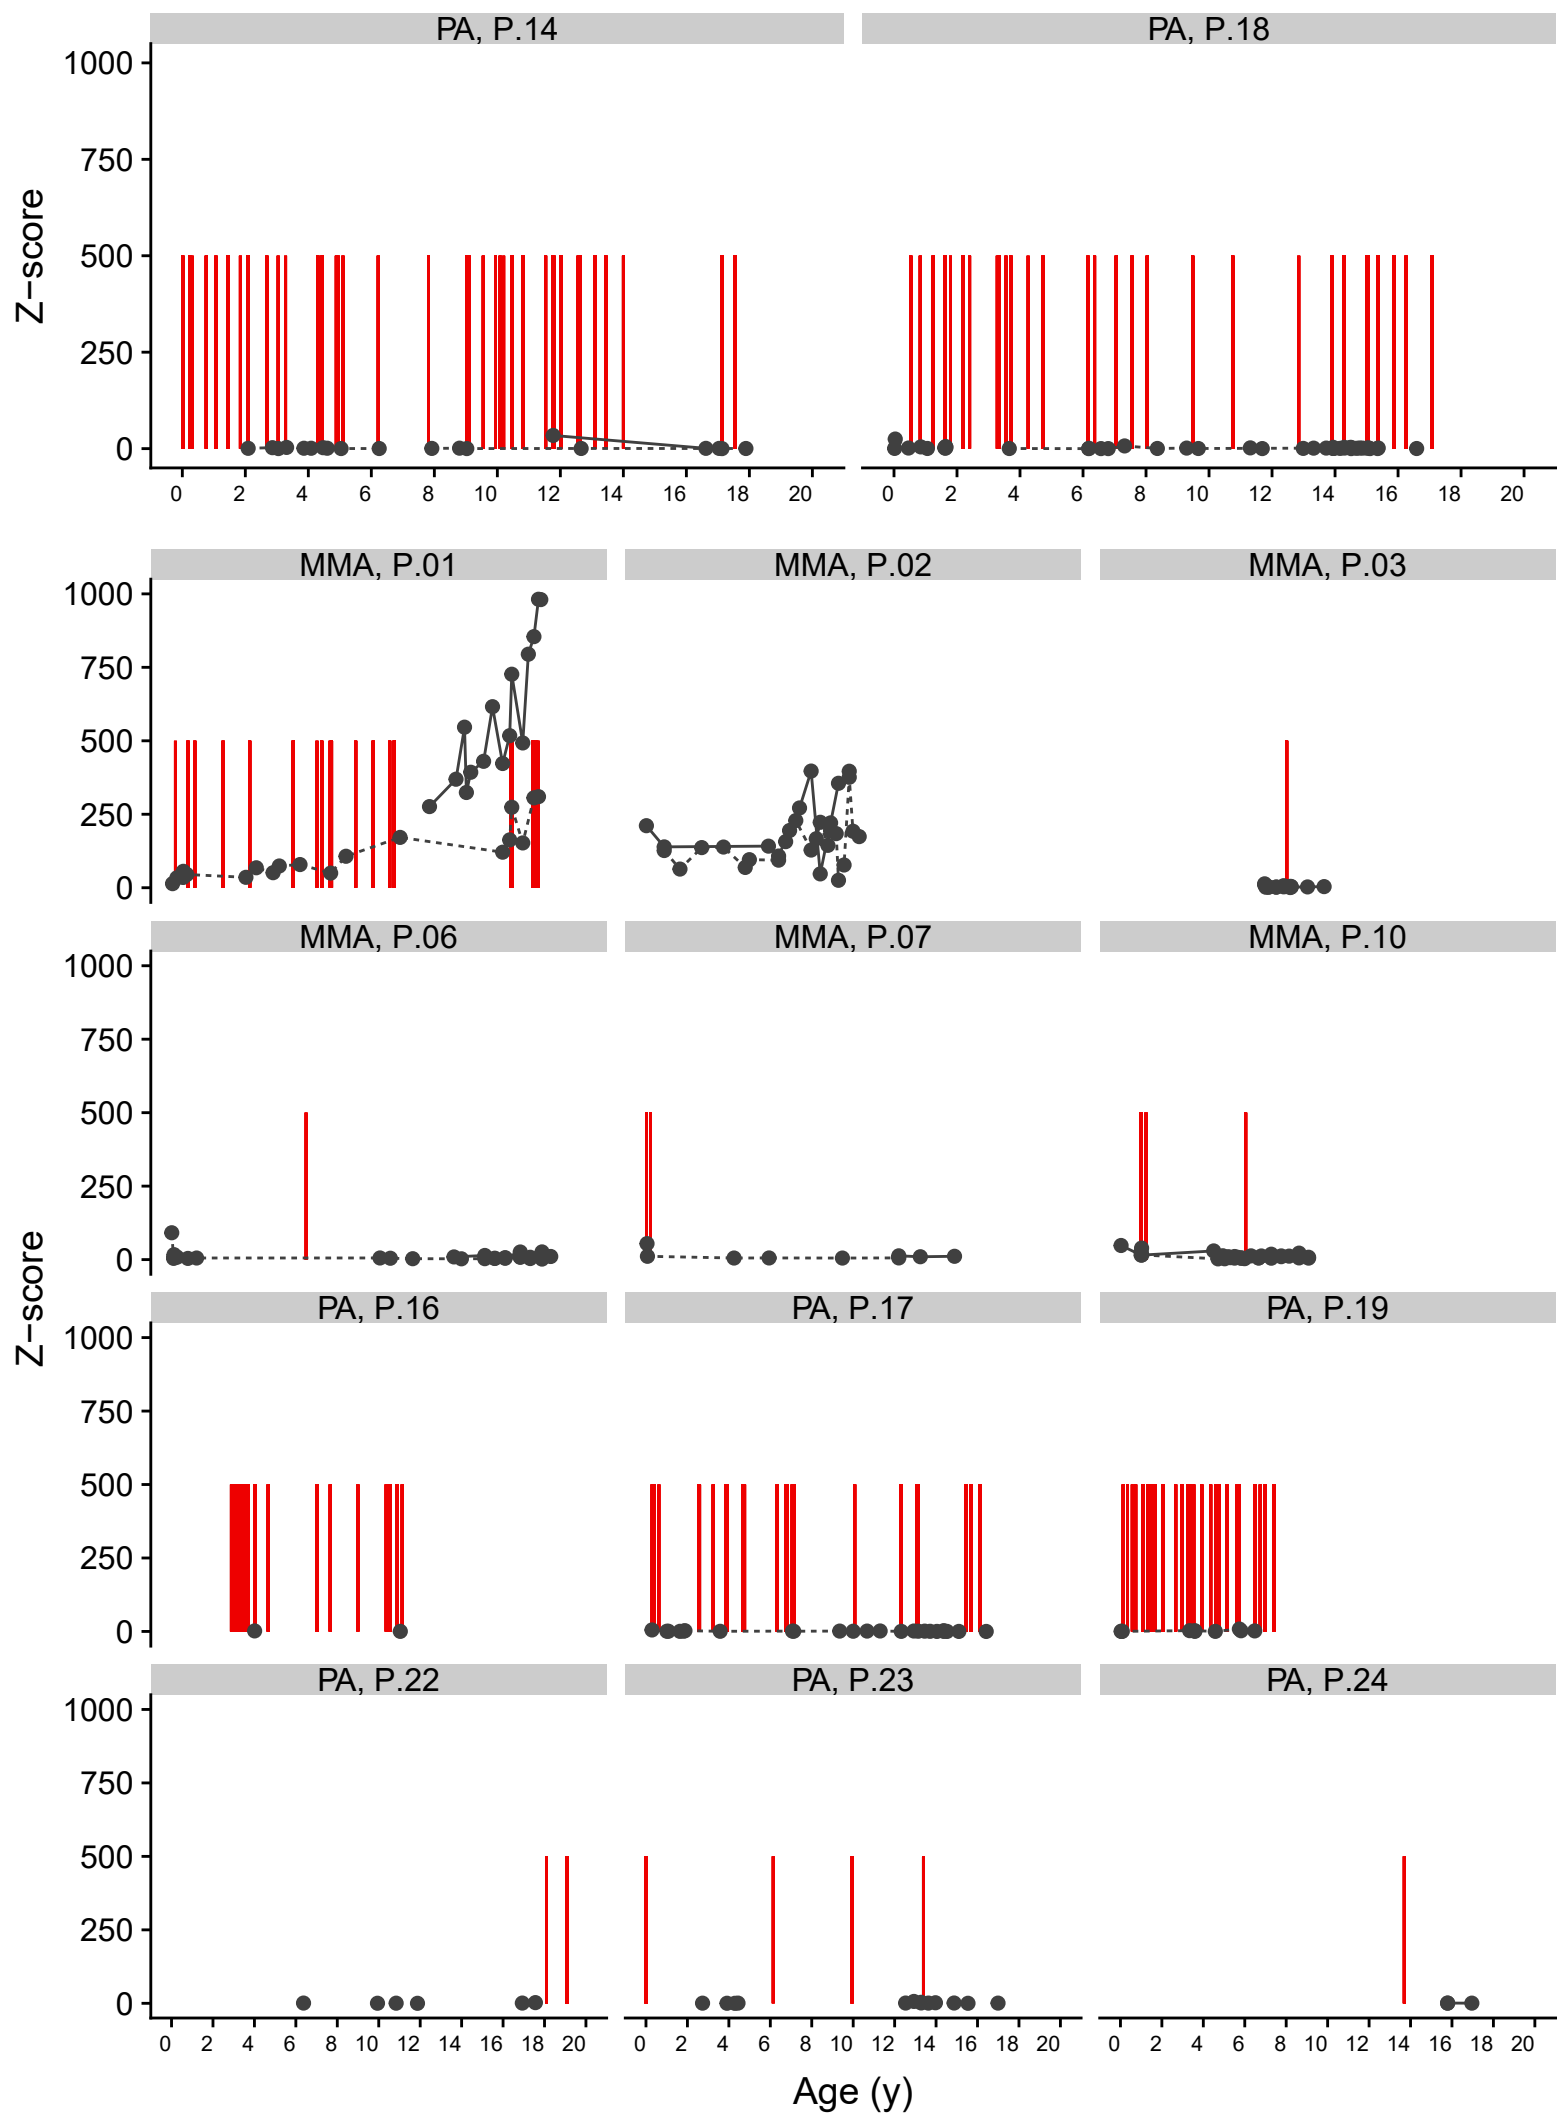

## Methylmalonylcarnitine (PL)

— Acute metabolic decompensations  
— Plasma, targeted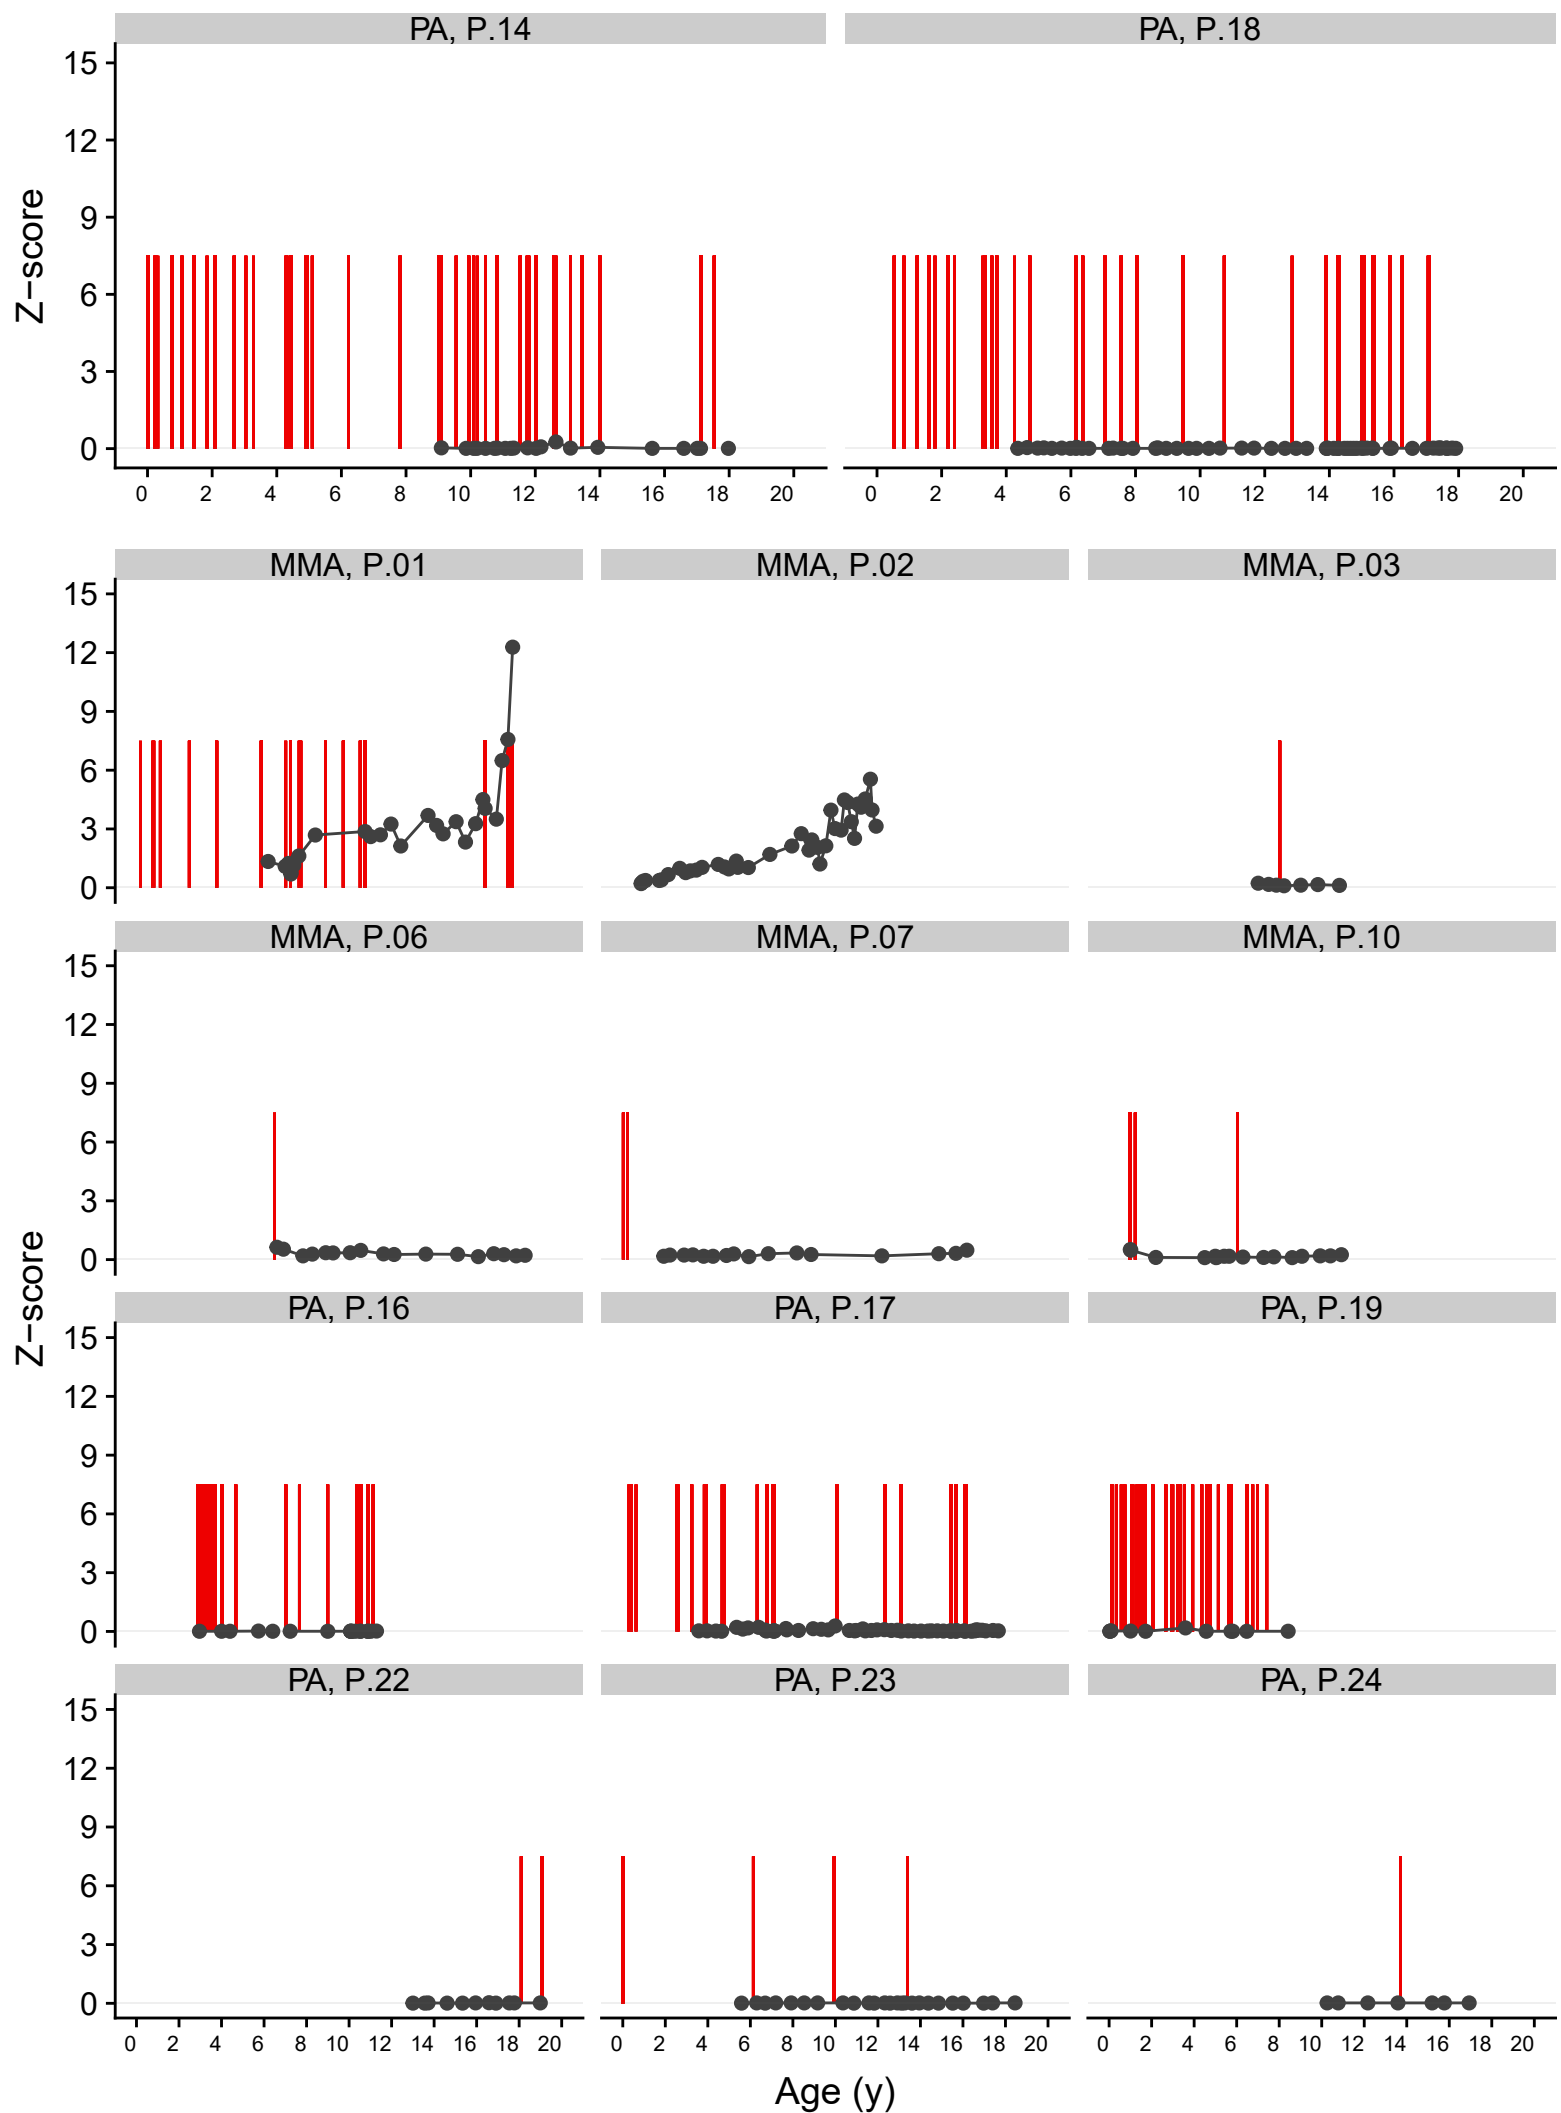

# Supplementary Figure 17

## Methylmalonylcarnitine (DI-HRMS)

- Acute metabolic decompensations
- Dried blood spots
- - - Plasma

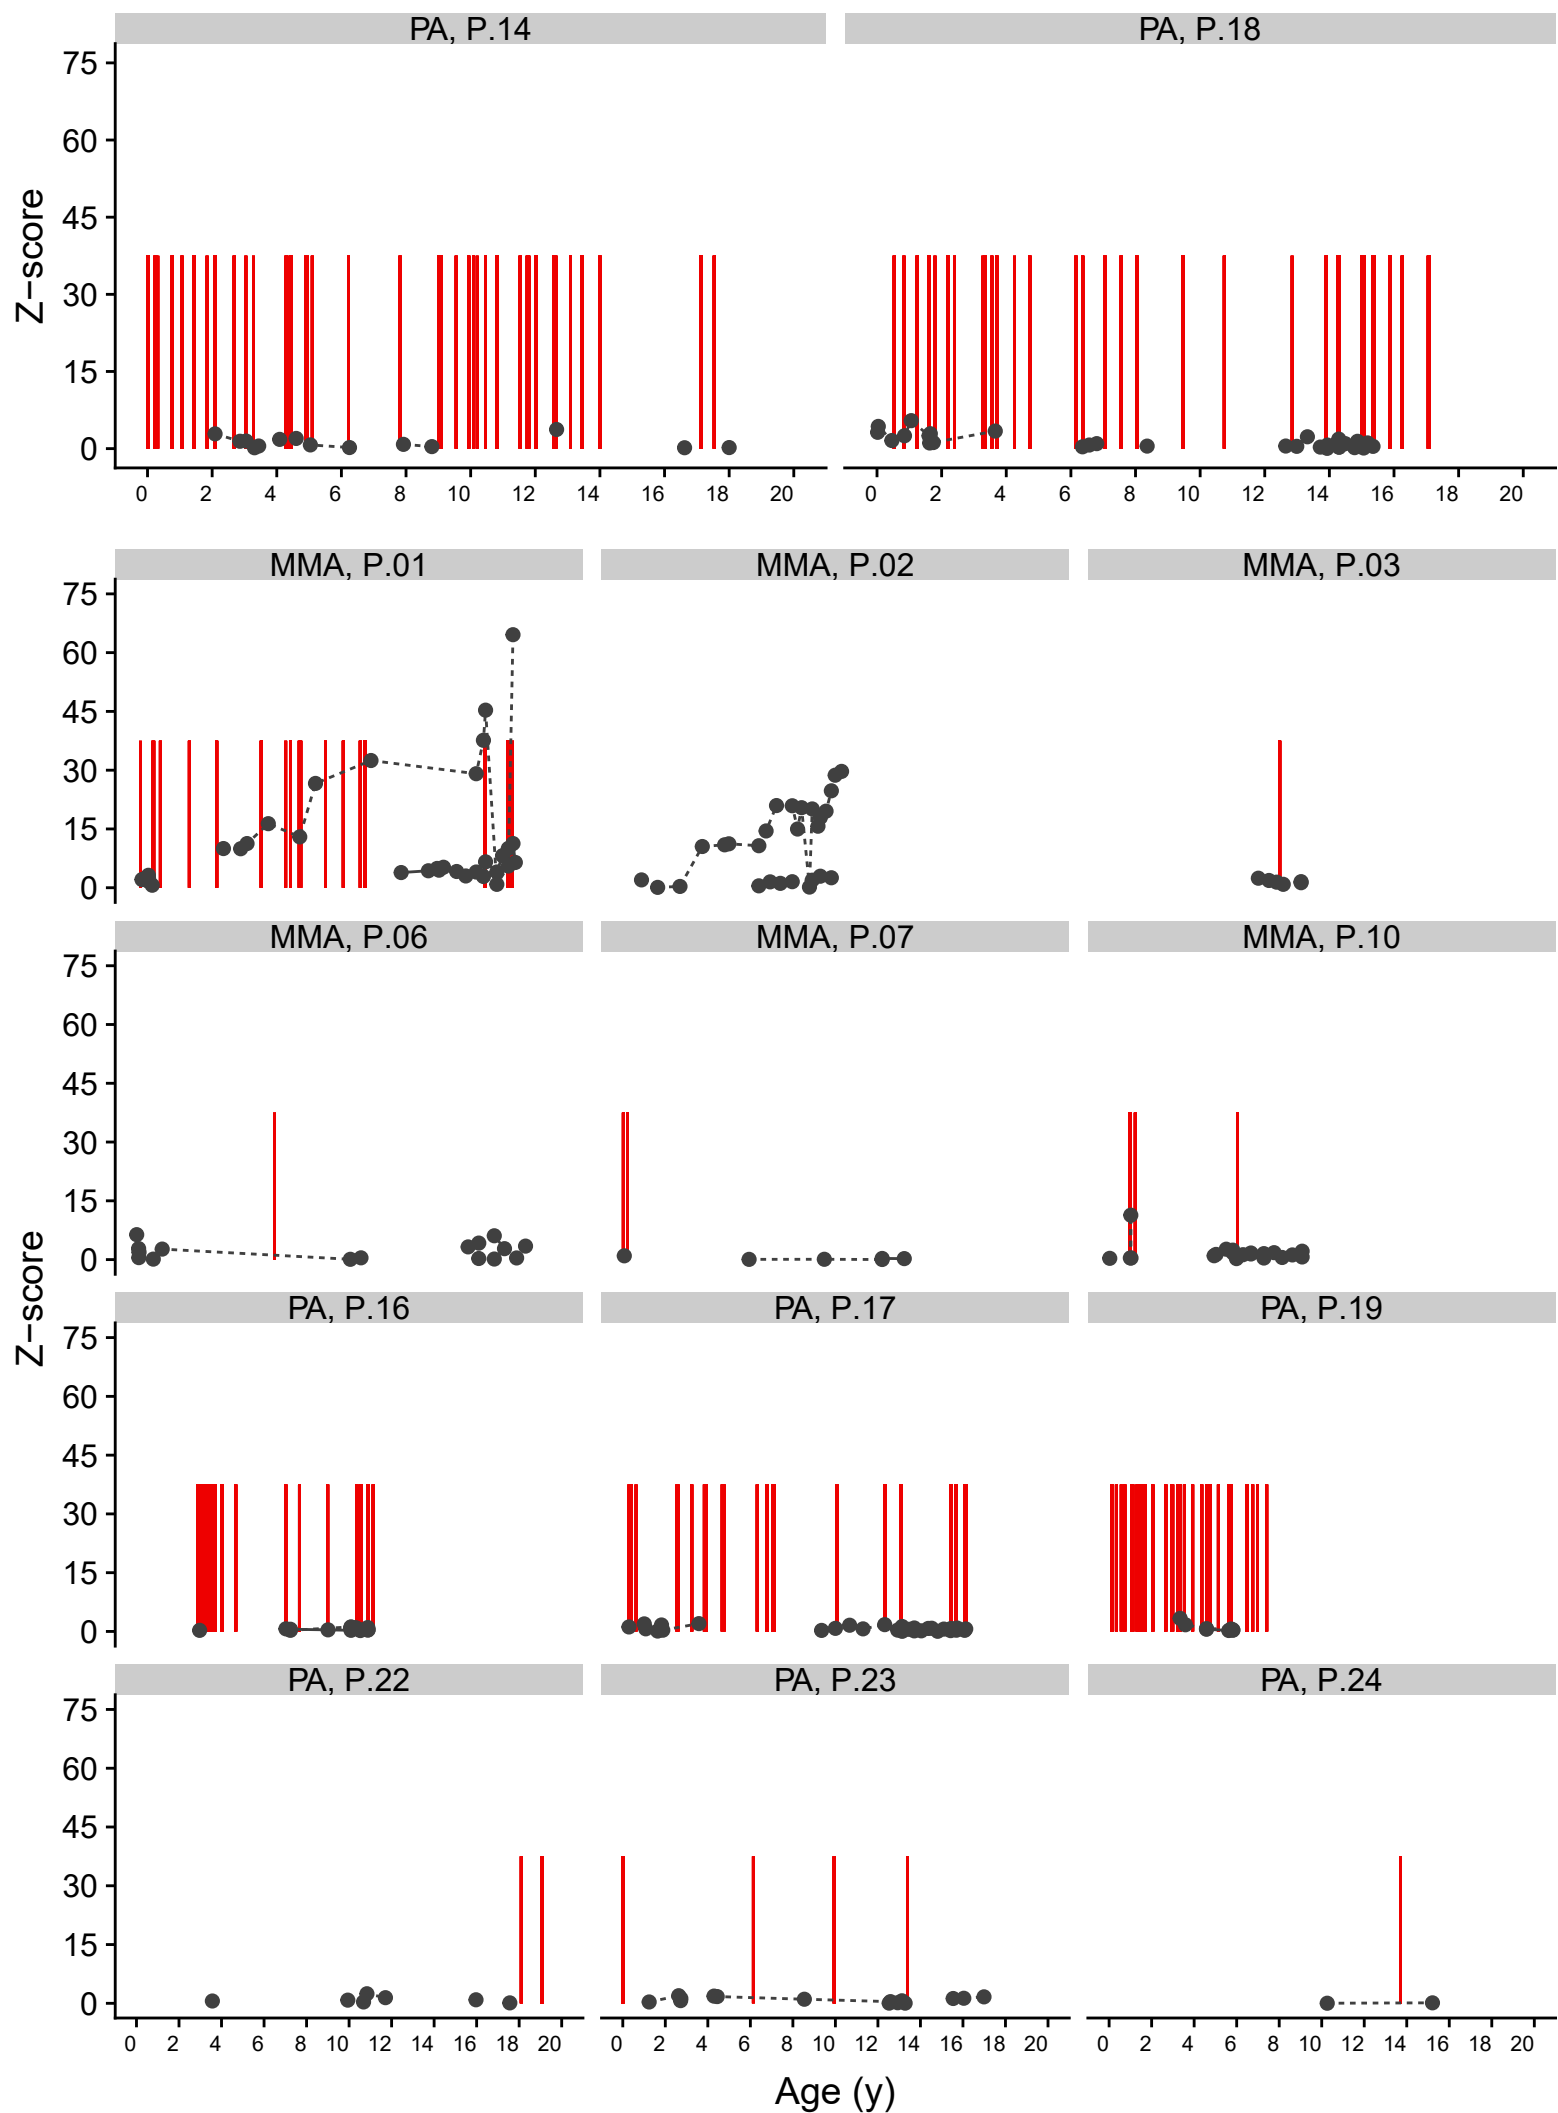

**Biomarkers AMD for PA and MMA, from clinical chemistry**

Urea (PL)

Glucose (PL)

Ammonia (PL)

Ionized calcium (PL)

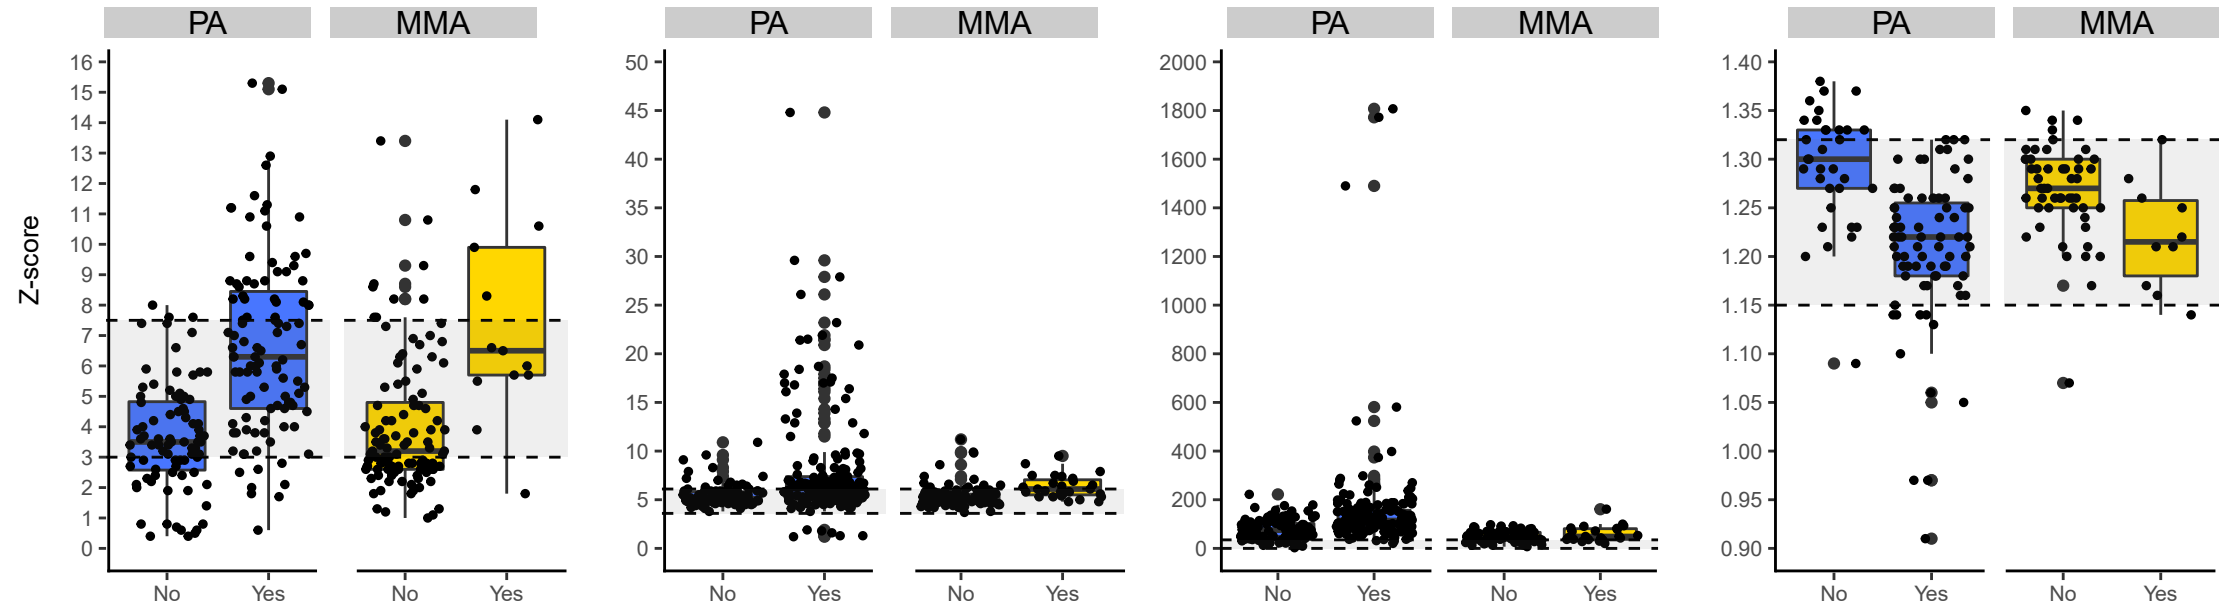

**Biomarkers AMD for PA, from DI-HRMS analysis**

Acetylcysteine (PL)

Cortisol (PL)

3-Hydroxyisovaleric acid (PL)

Fructoseglycine (PL)

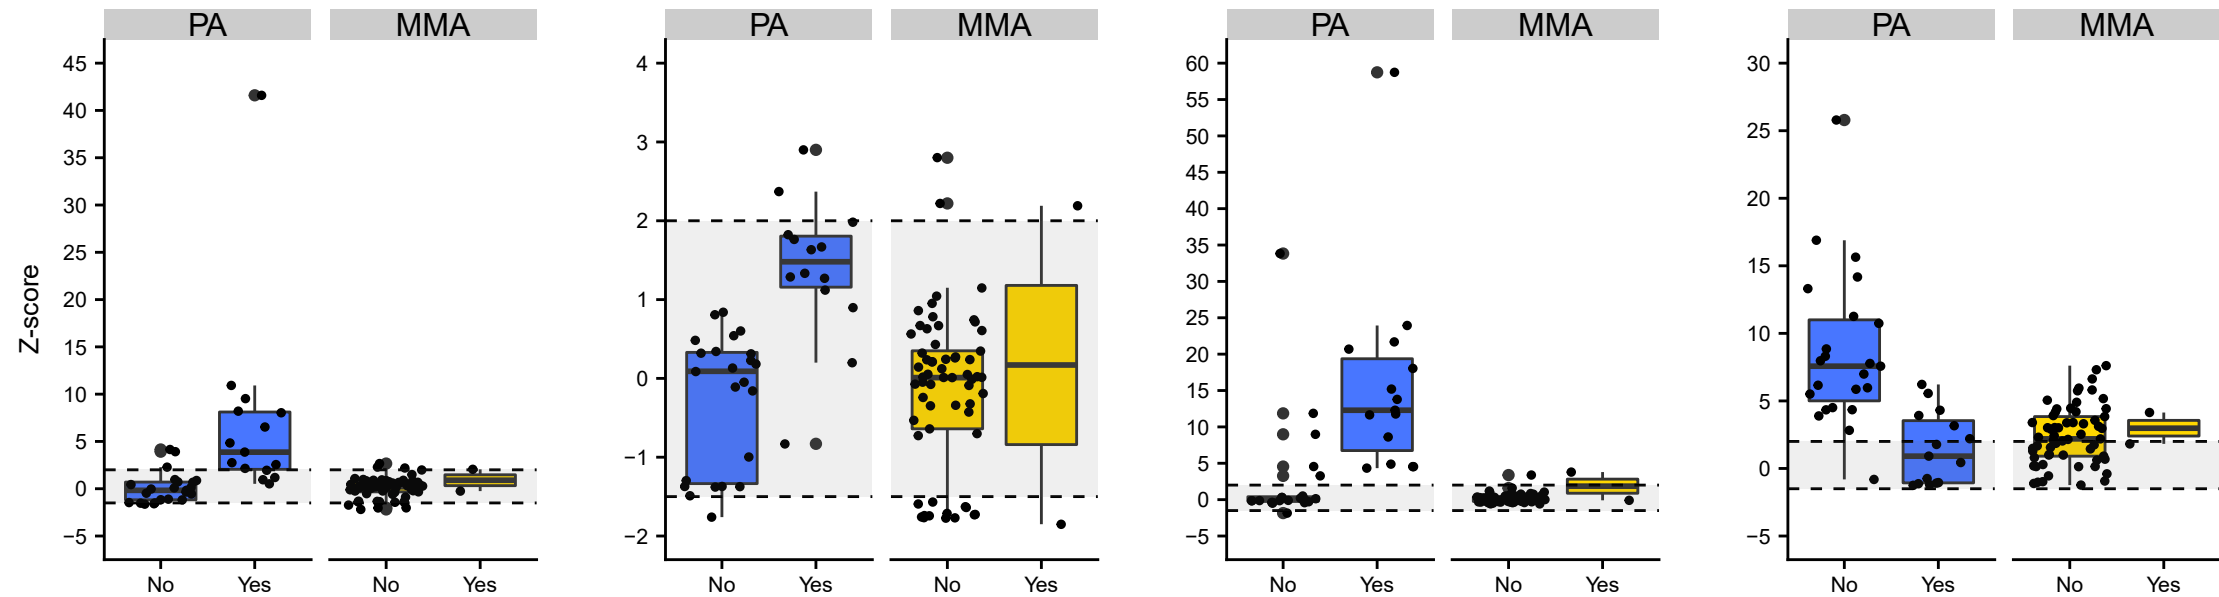

# Supplementary Figure 19

## Urea (PL)

— Acute metabolic decompensations  
— Plasma, targeted

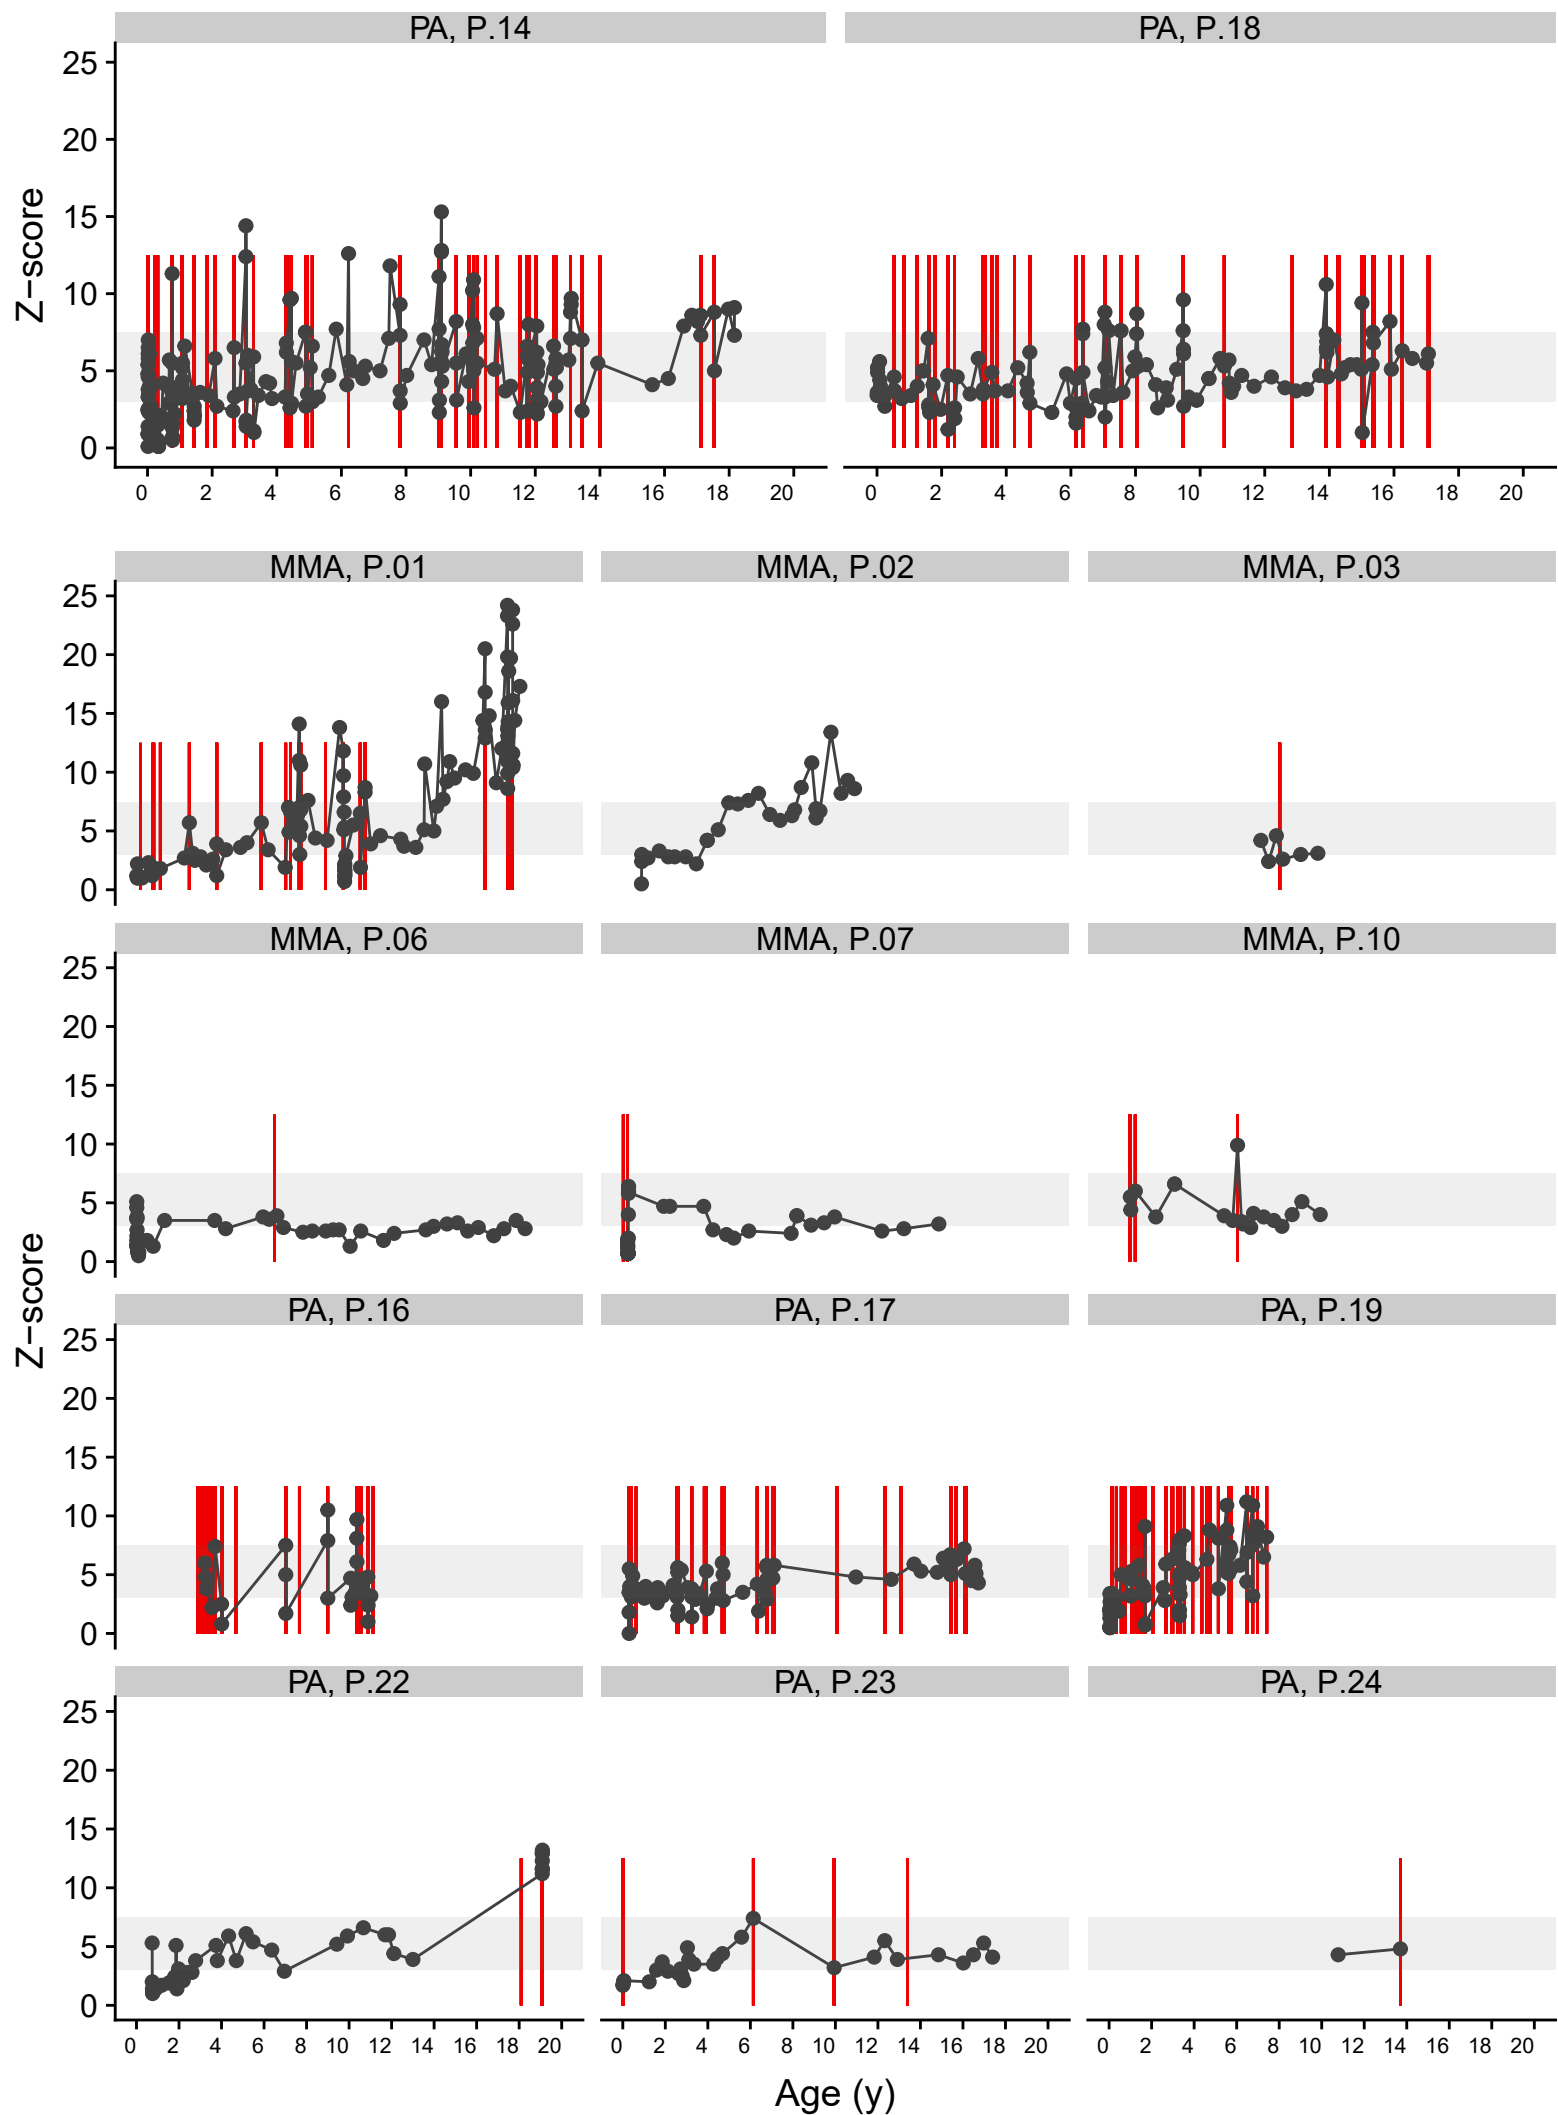

Ammonia (PL)

— Acute metabolic decompensations  
— Plasma, targeted

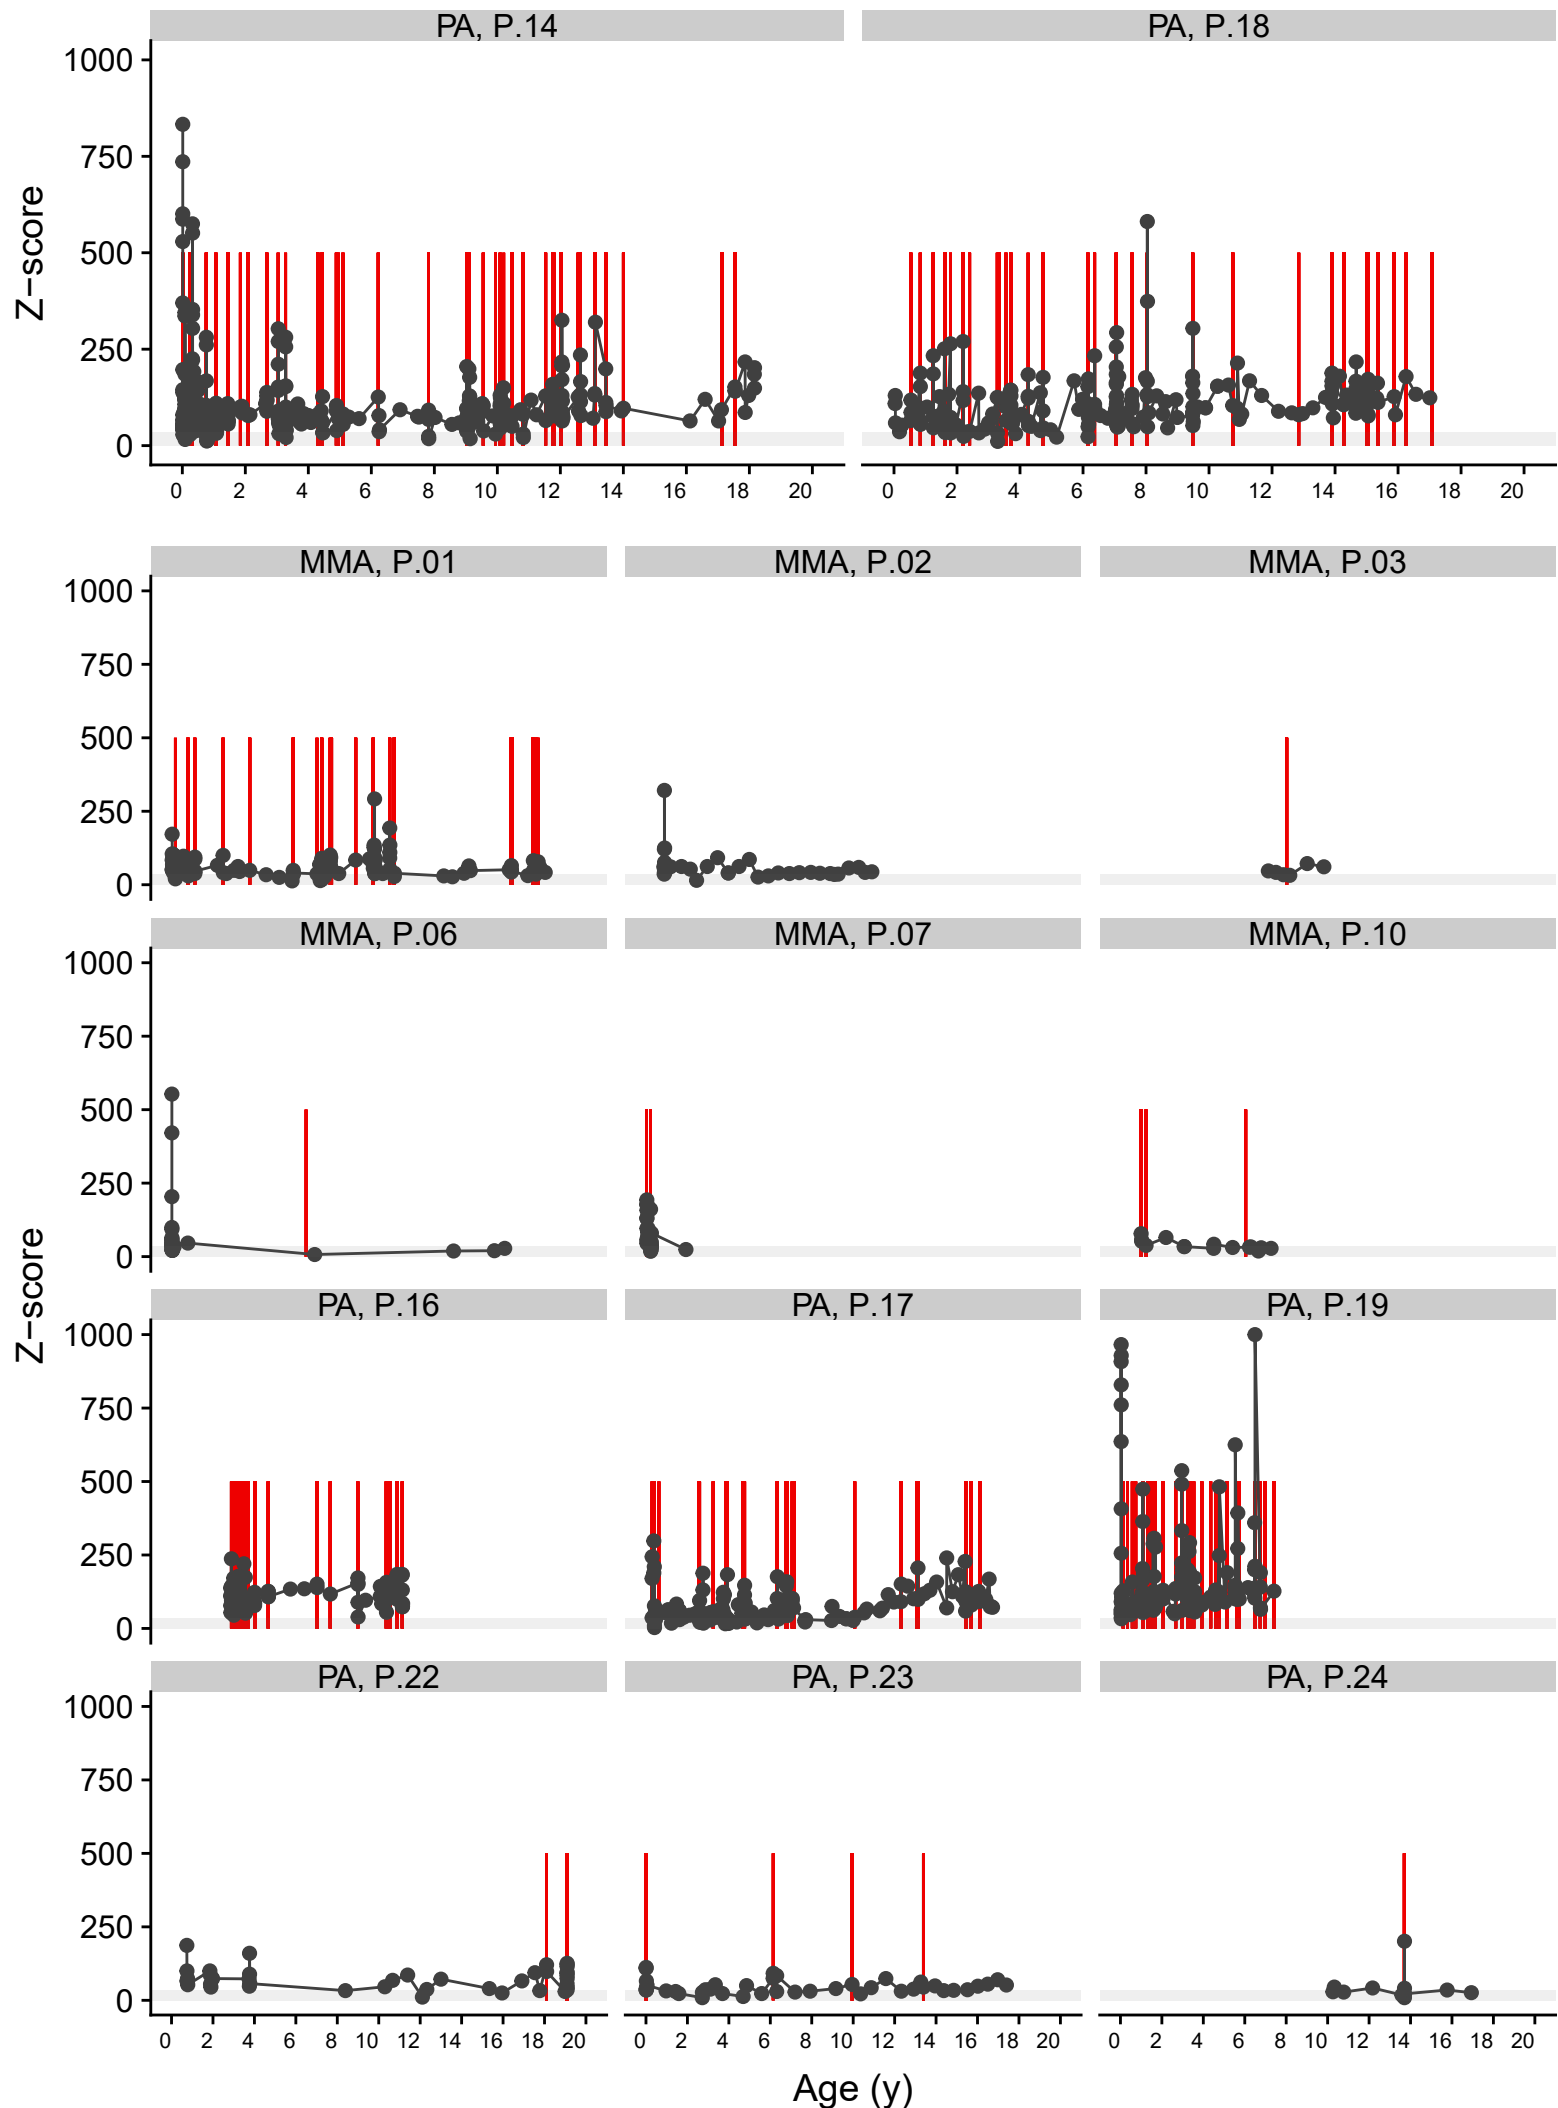



Biomarkers AMD for PA (increased), from targeted metabolic assays

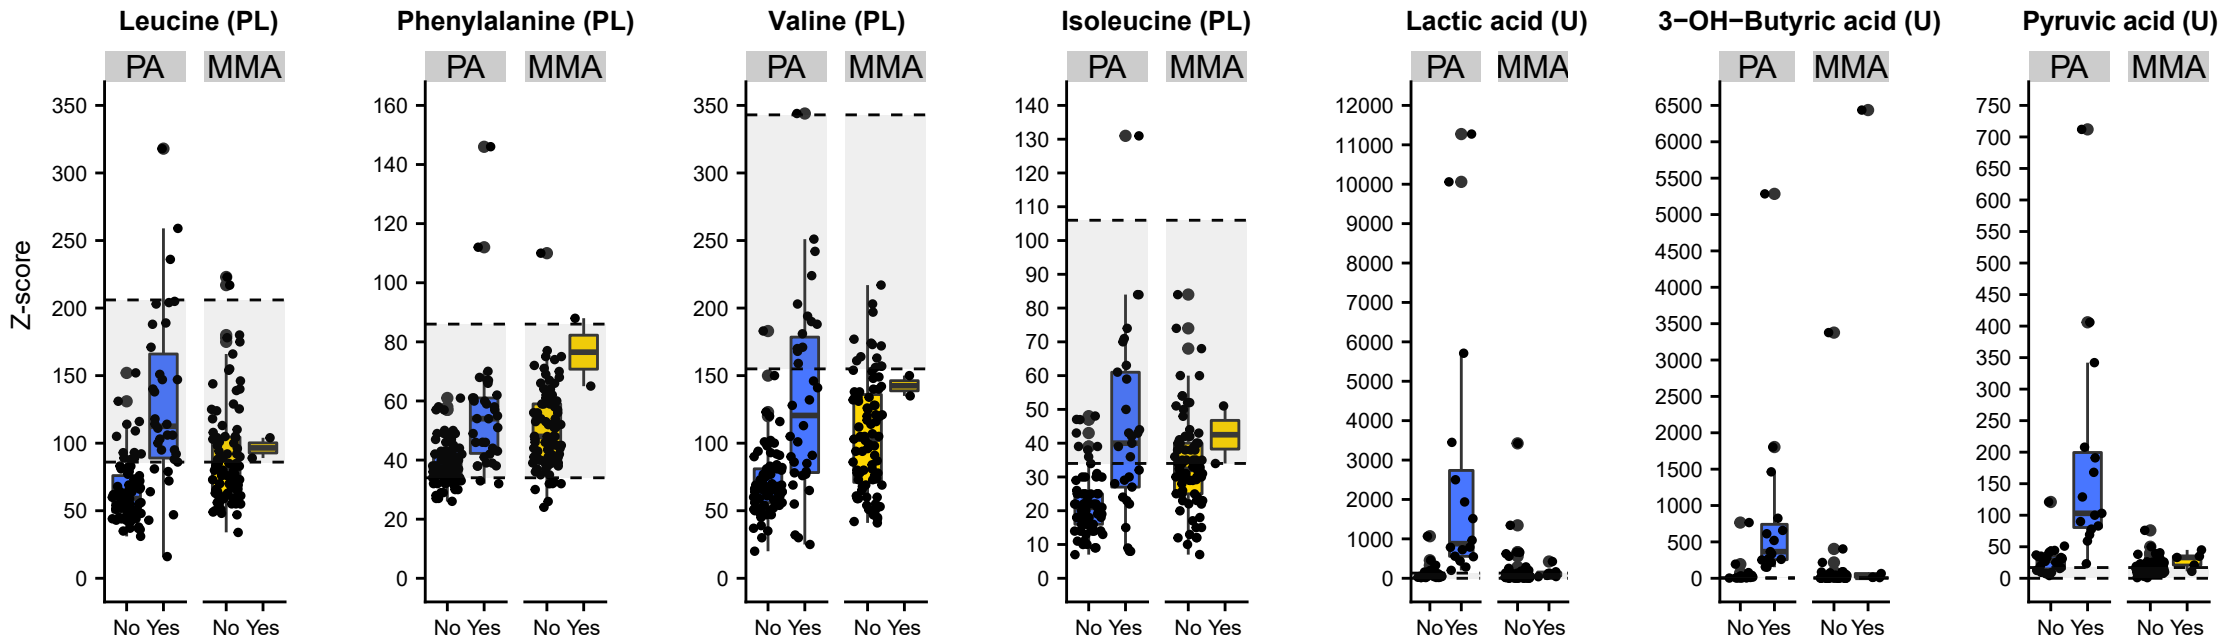

Biomarkers AMD for PA (decreased), from targeted metabolic assays

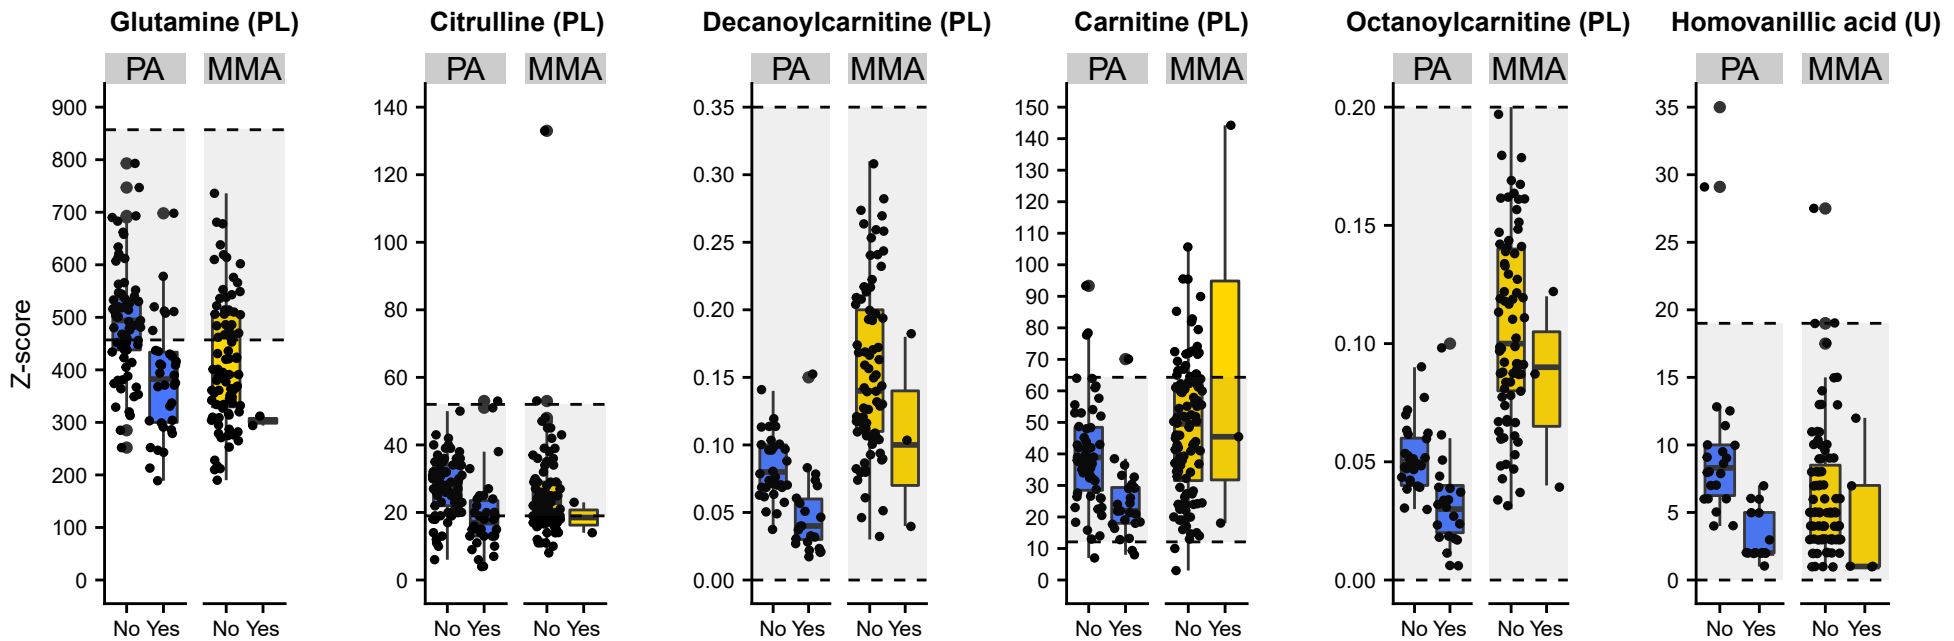

Valine (PL)

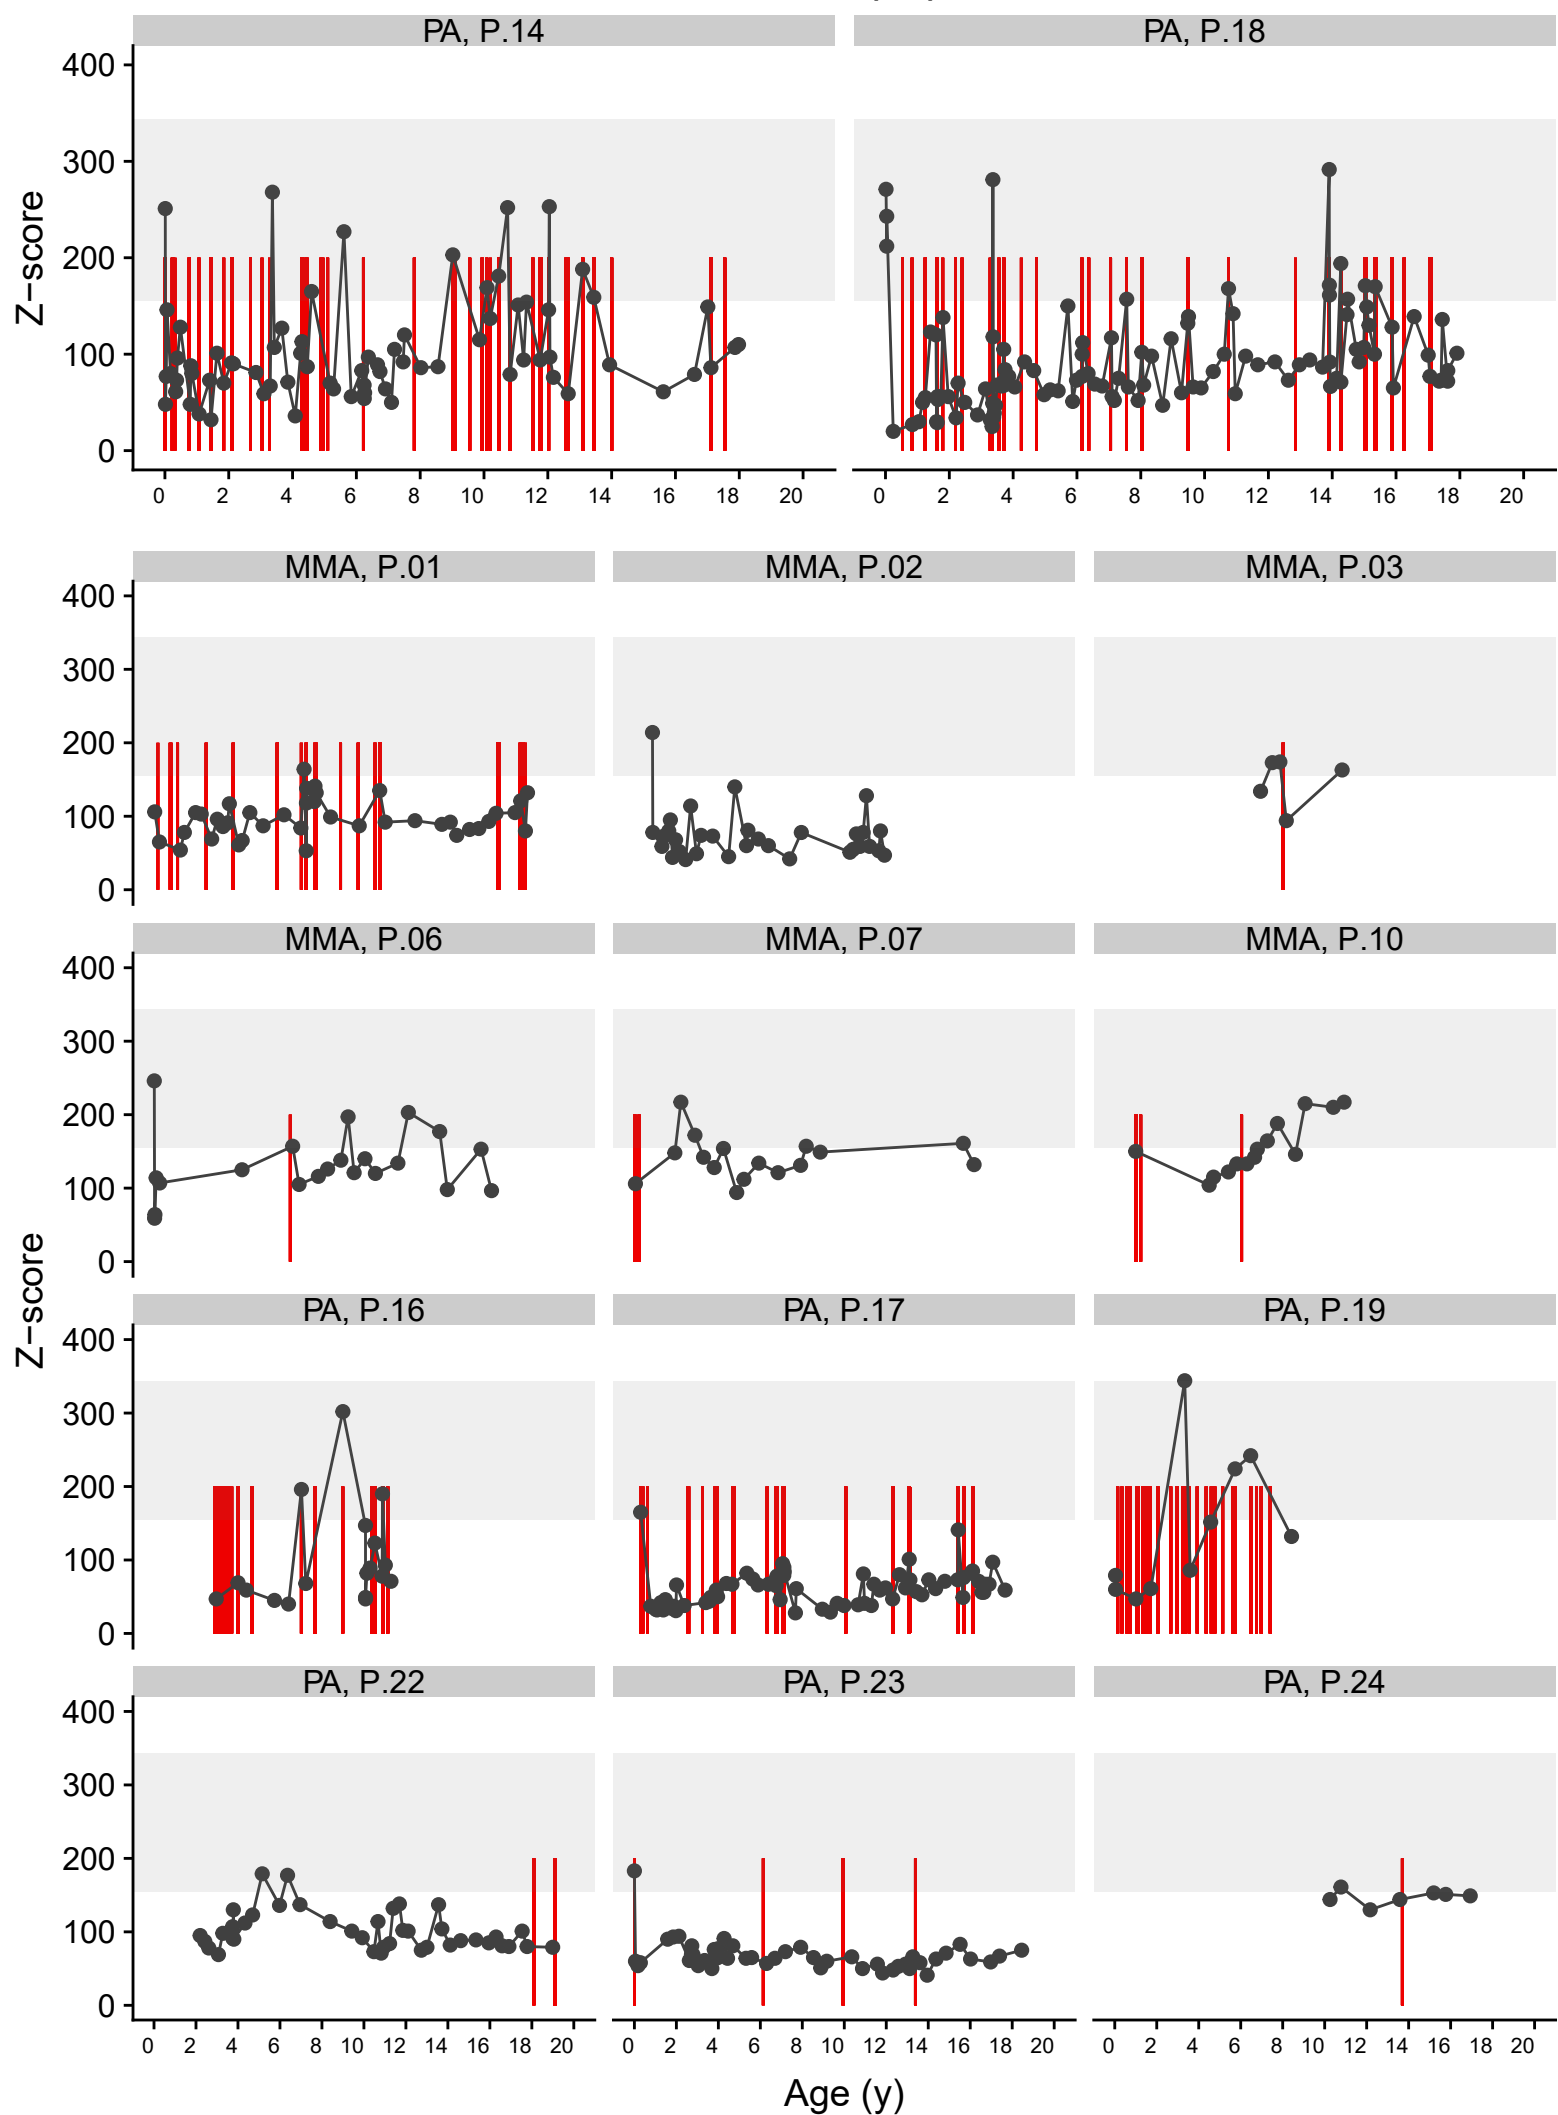

Isoleucine (PL)

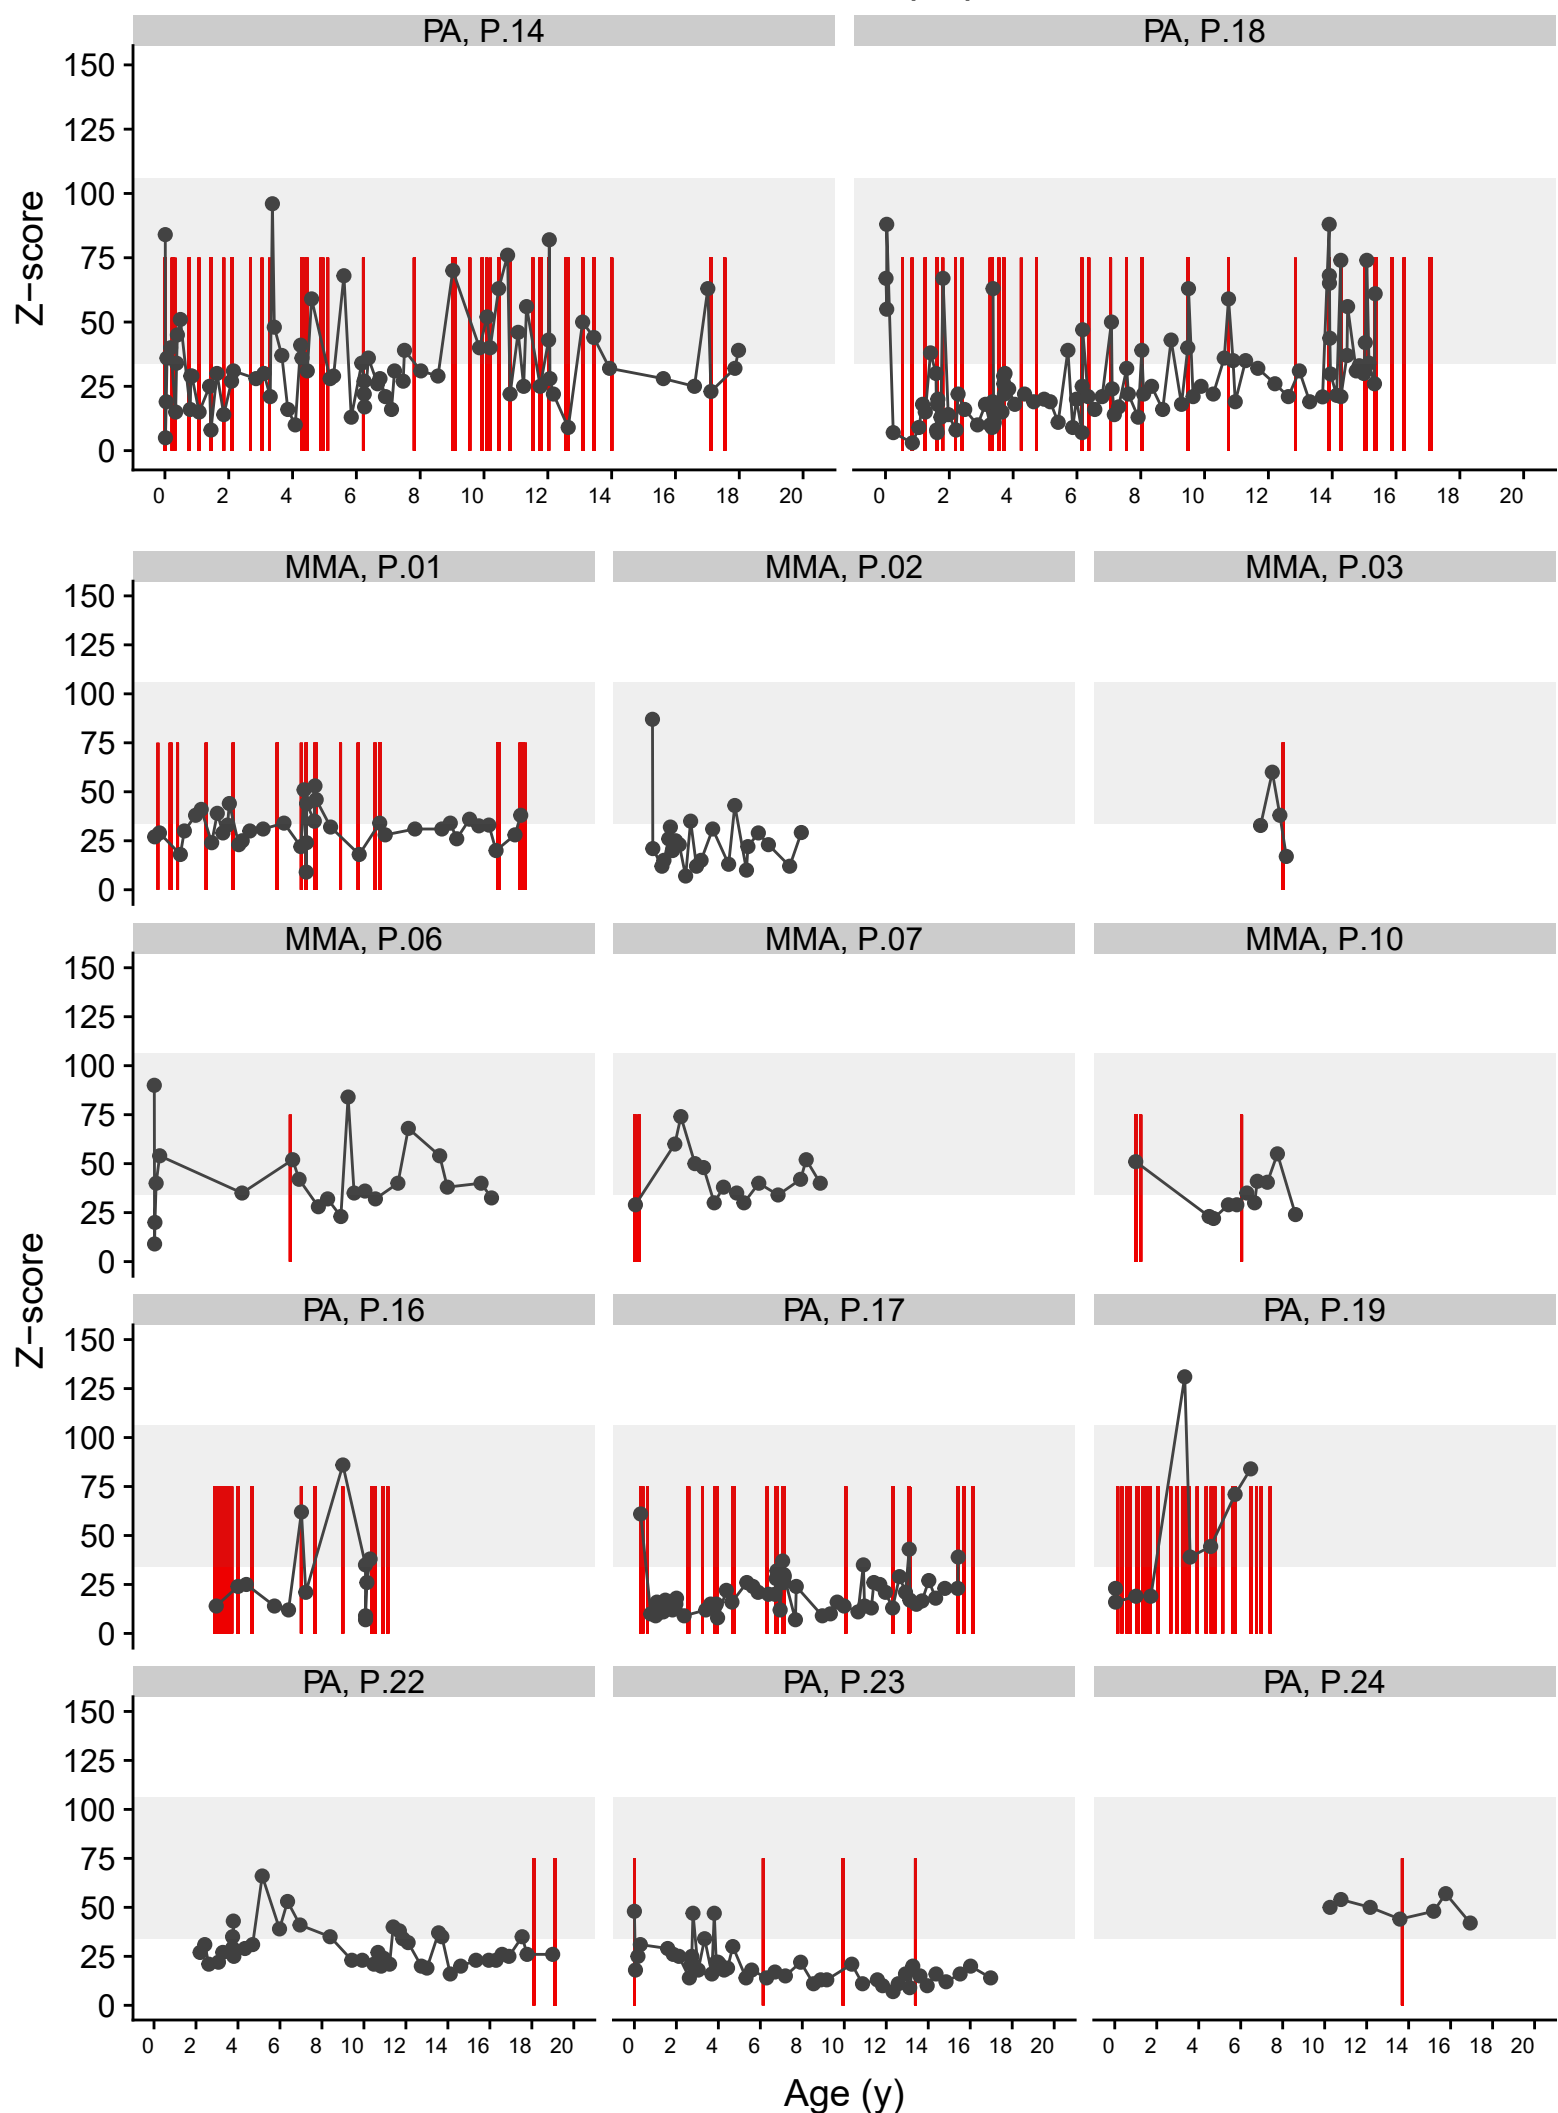

Glutamine (PL)

— Acute metabolic decompensations  
— Plasma, targeted

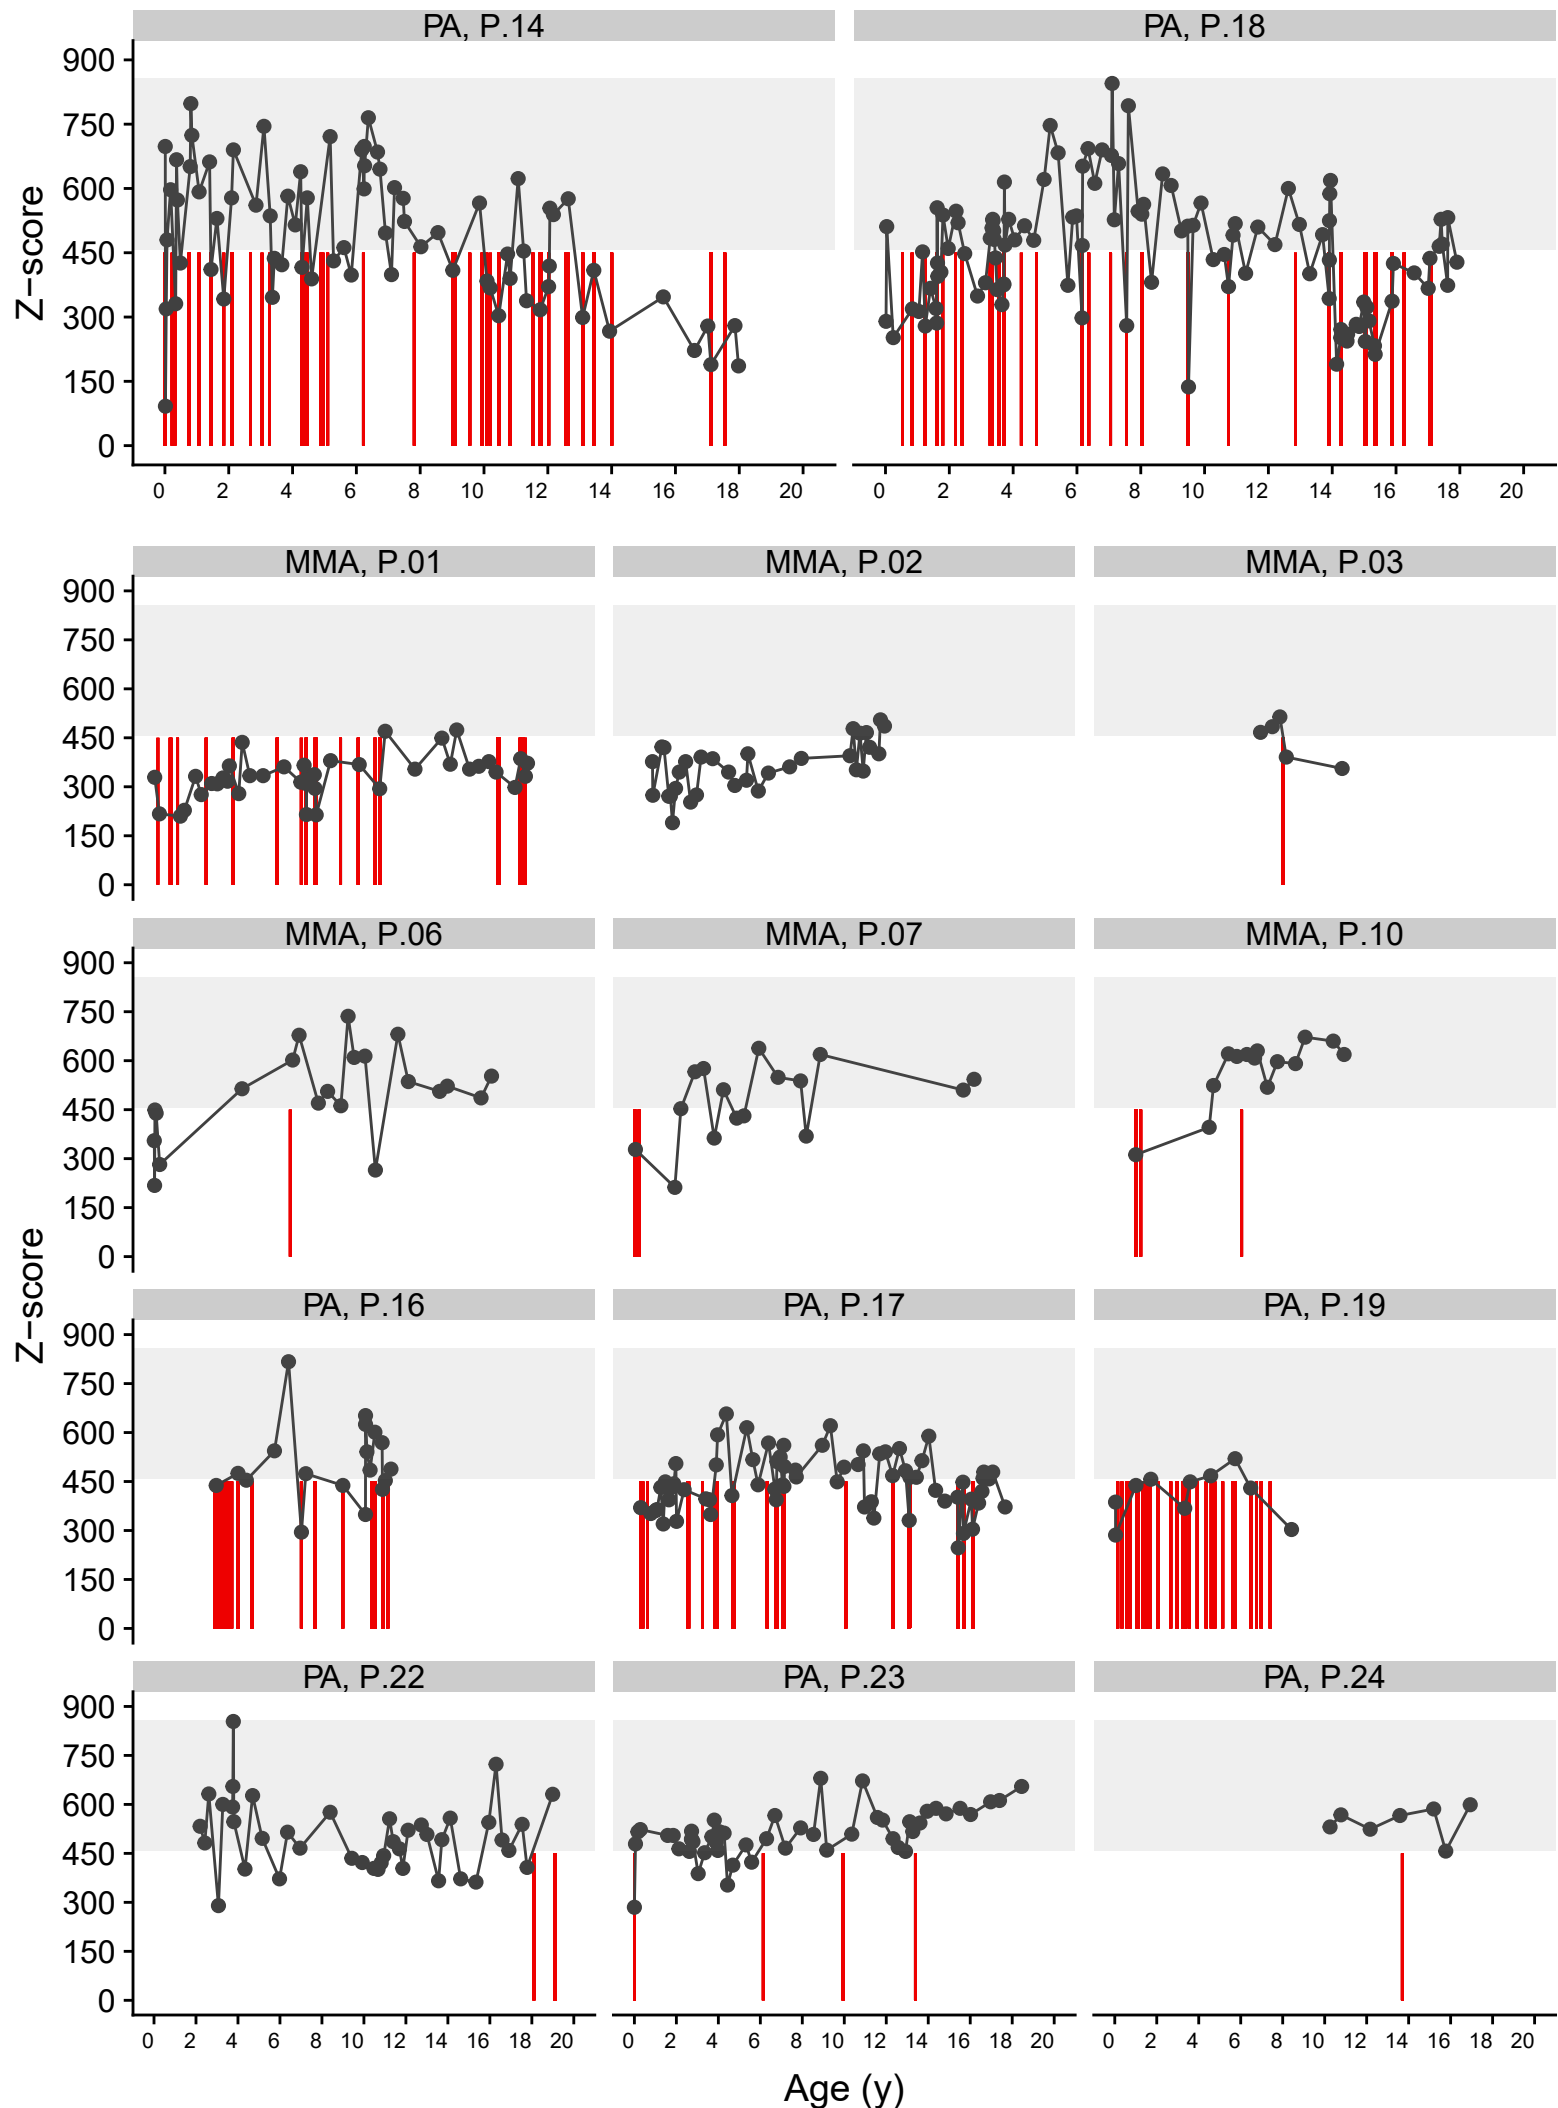

Citrulline (PL)

— Acute metabolic decompensations  
— Plasma, targeted

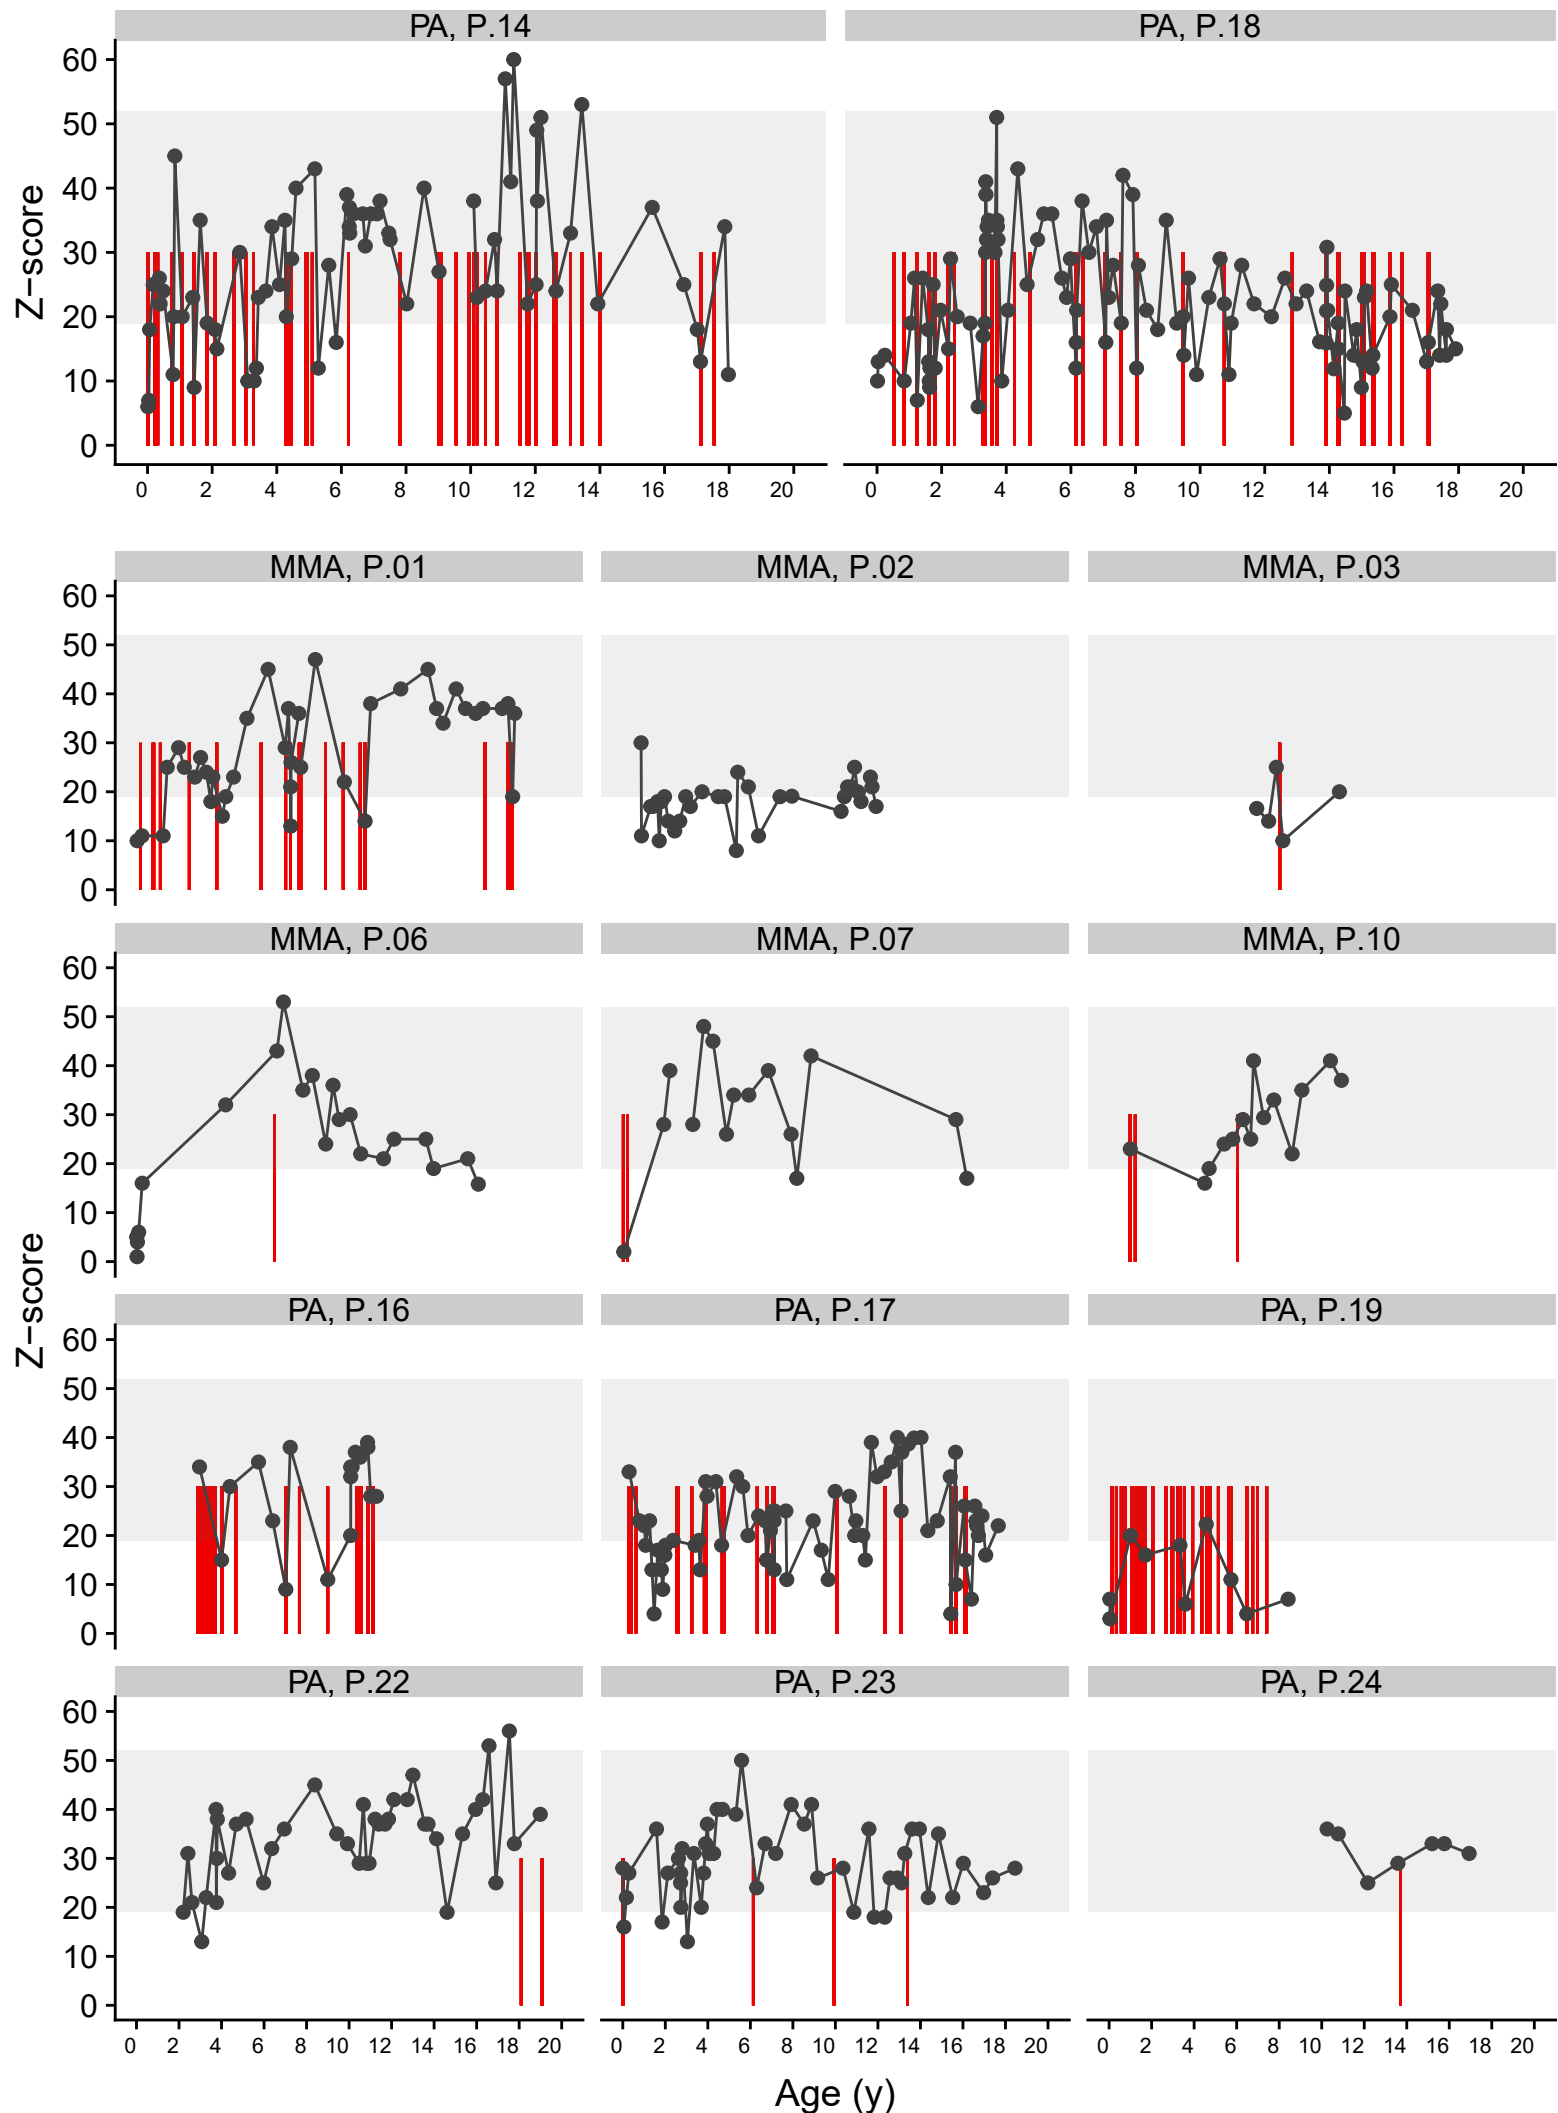

Free carnitine (PL)

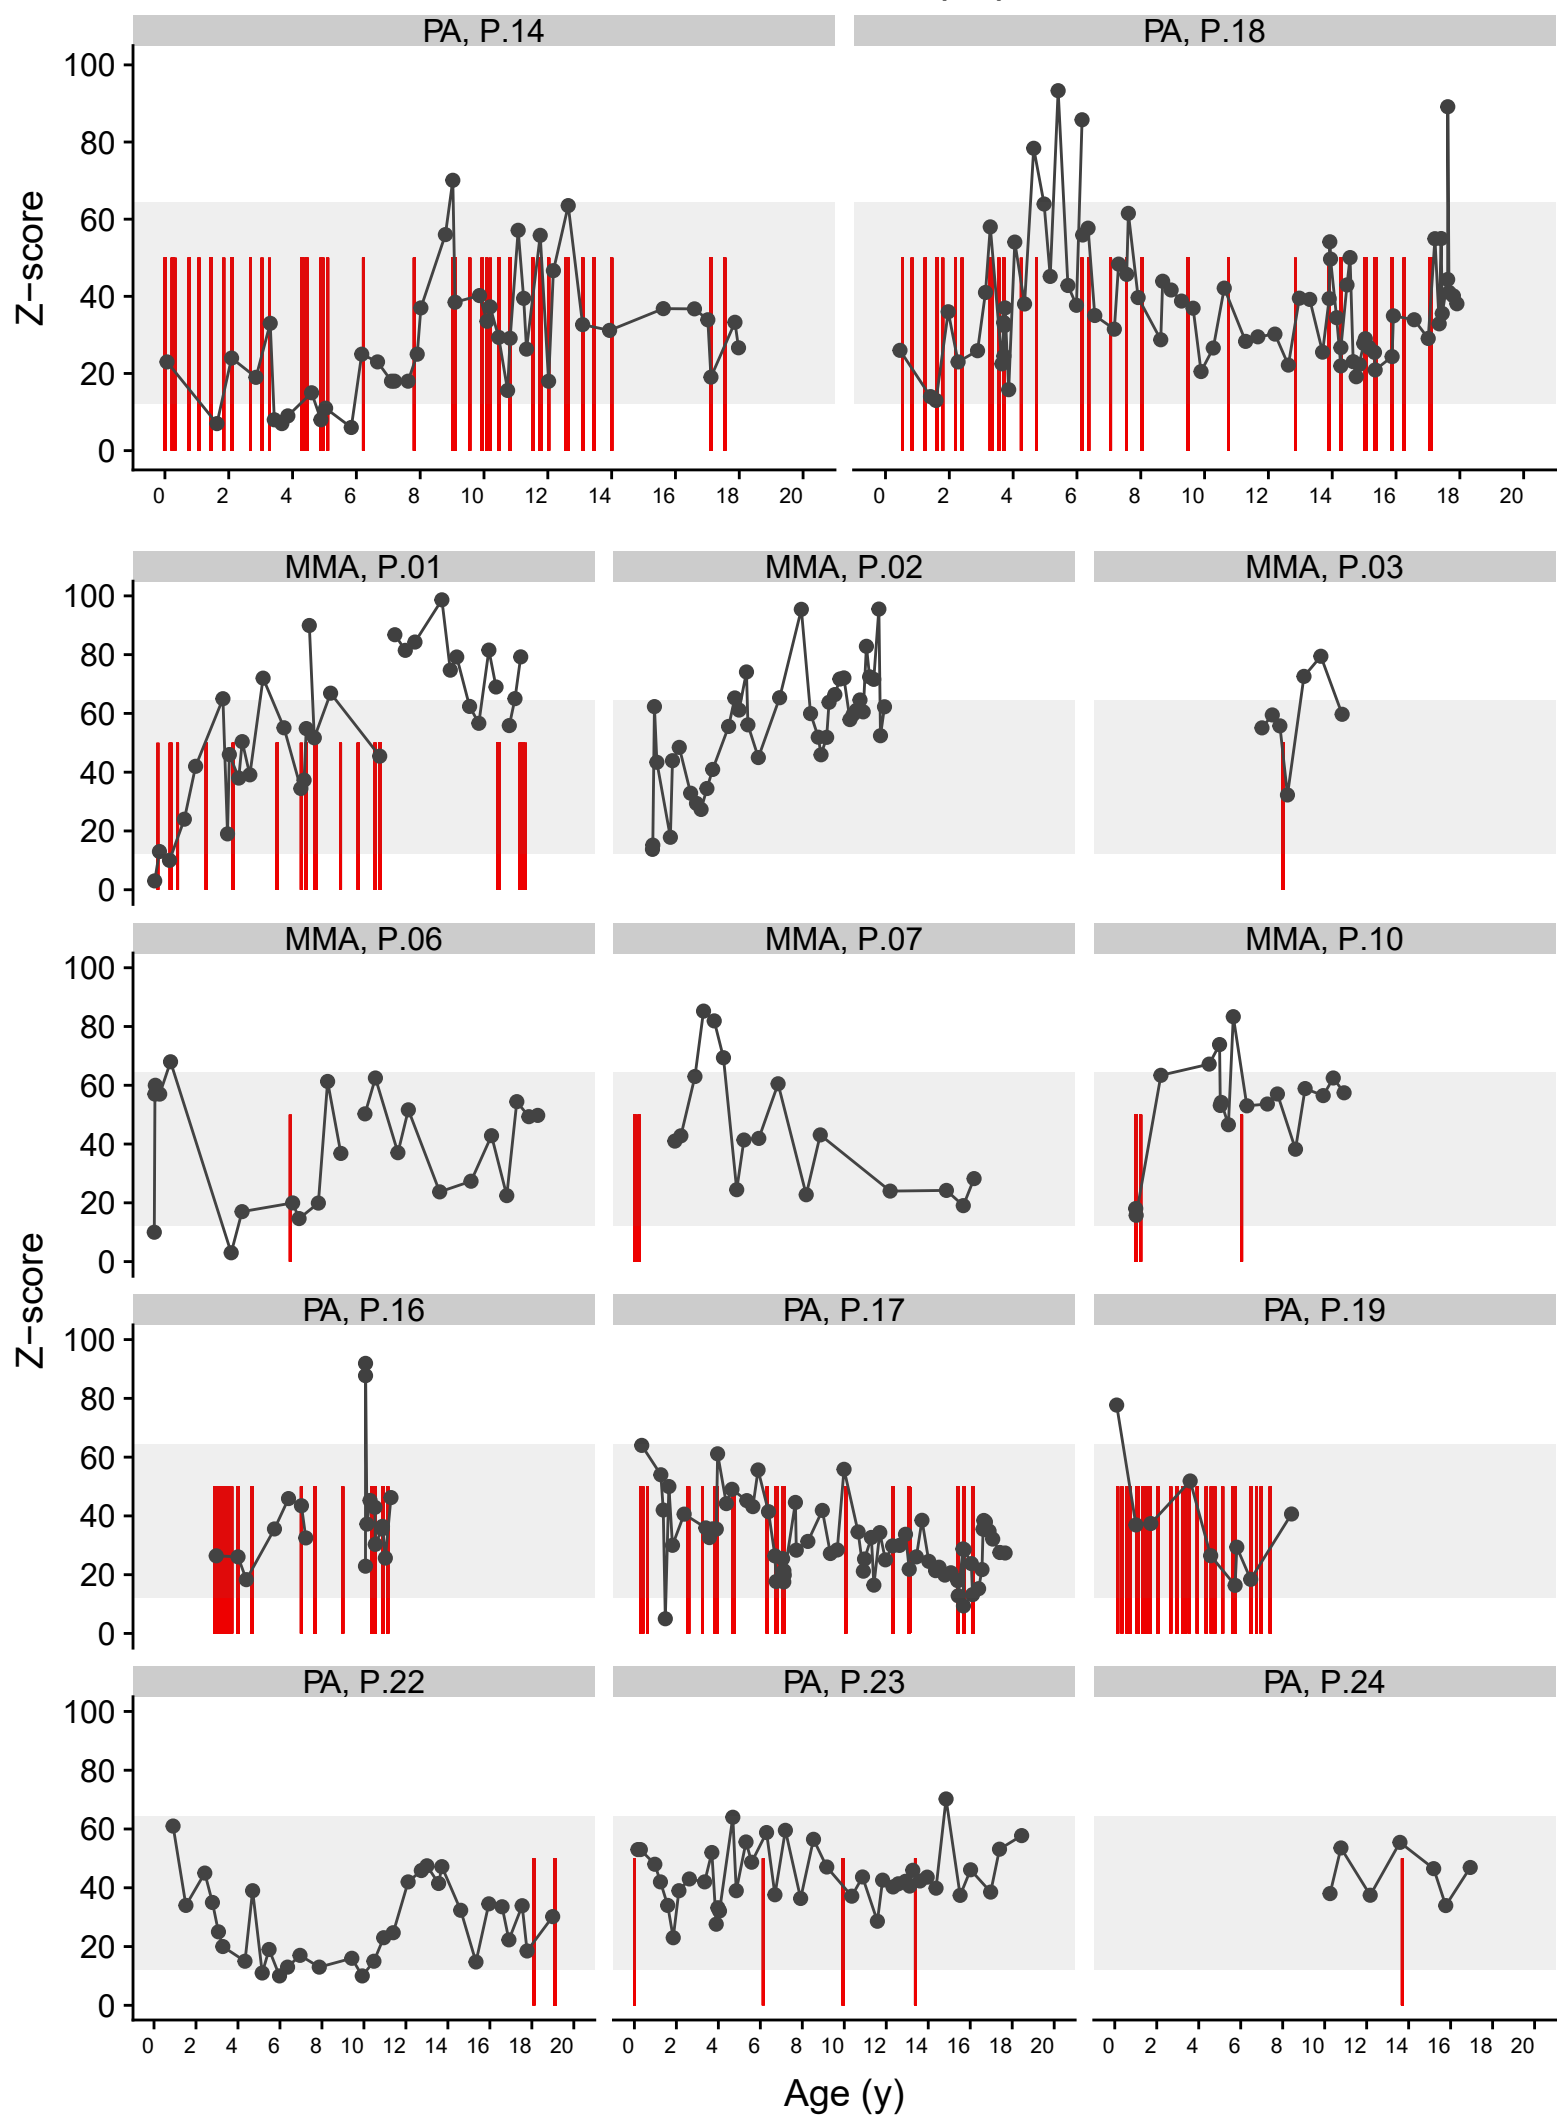

Lactate (U)

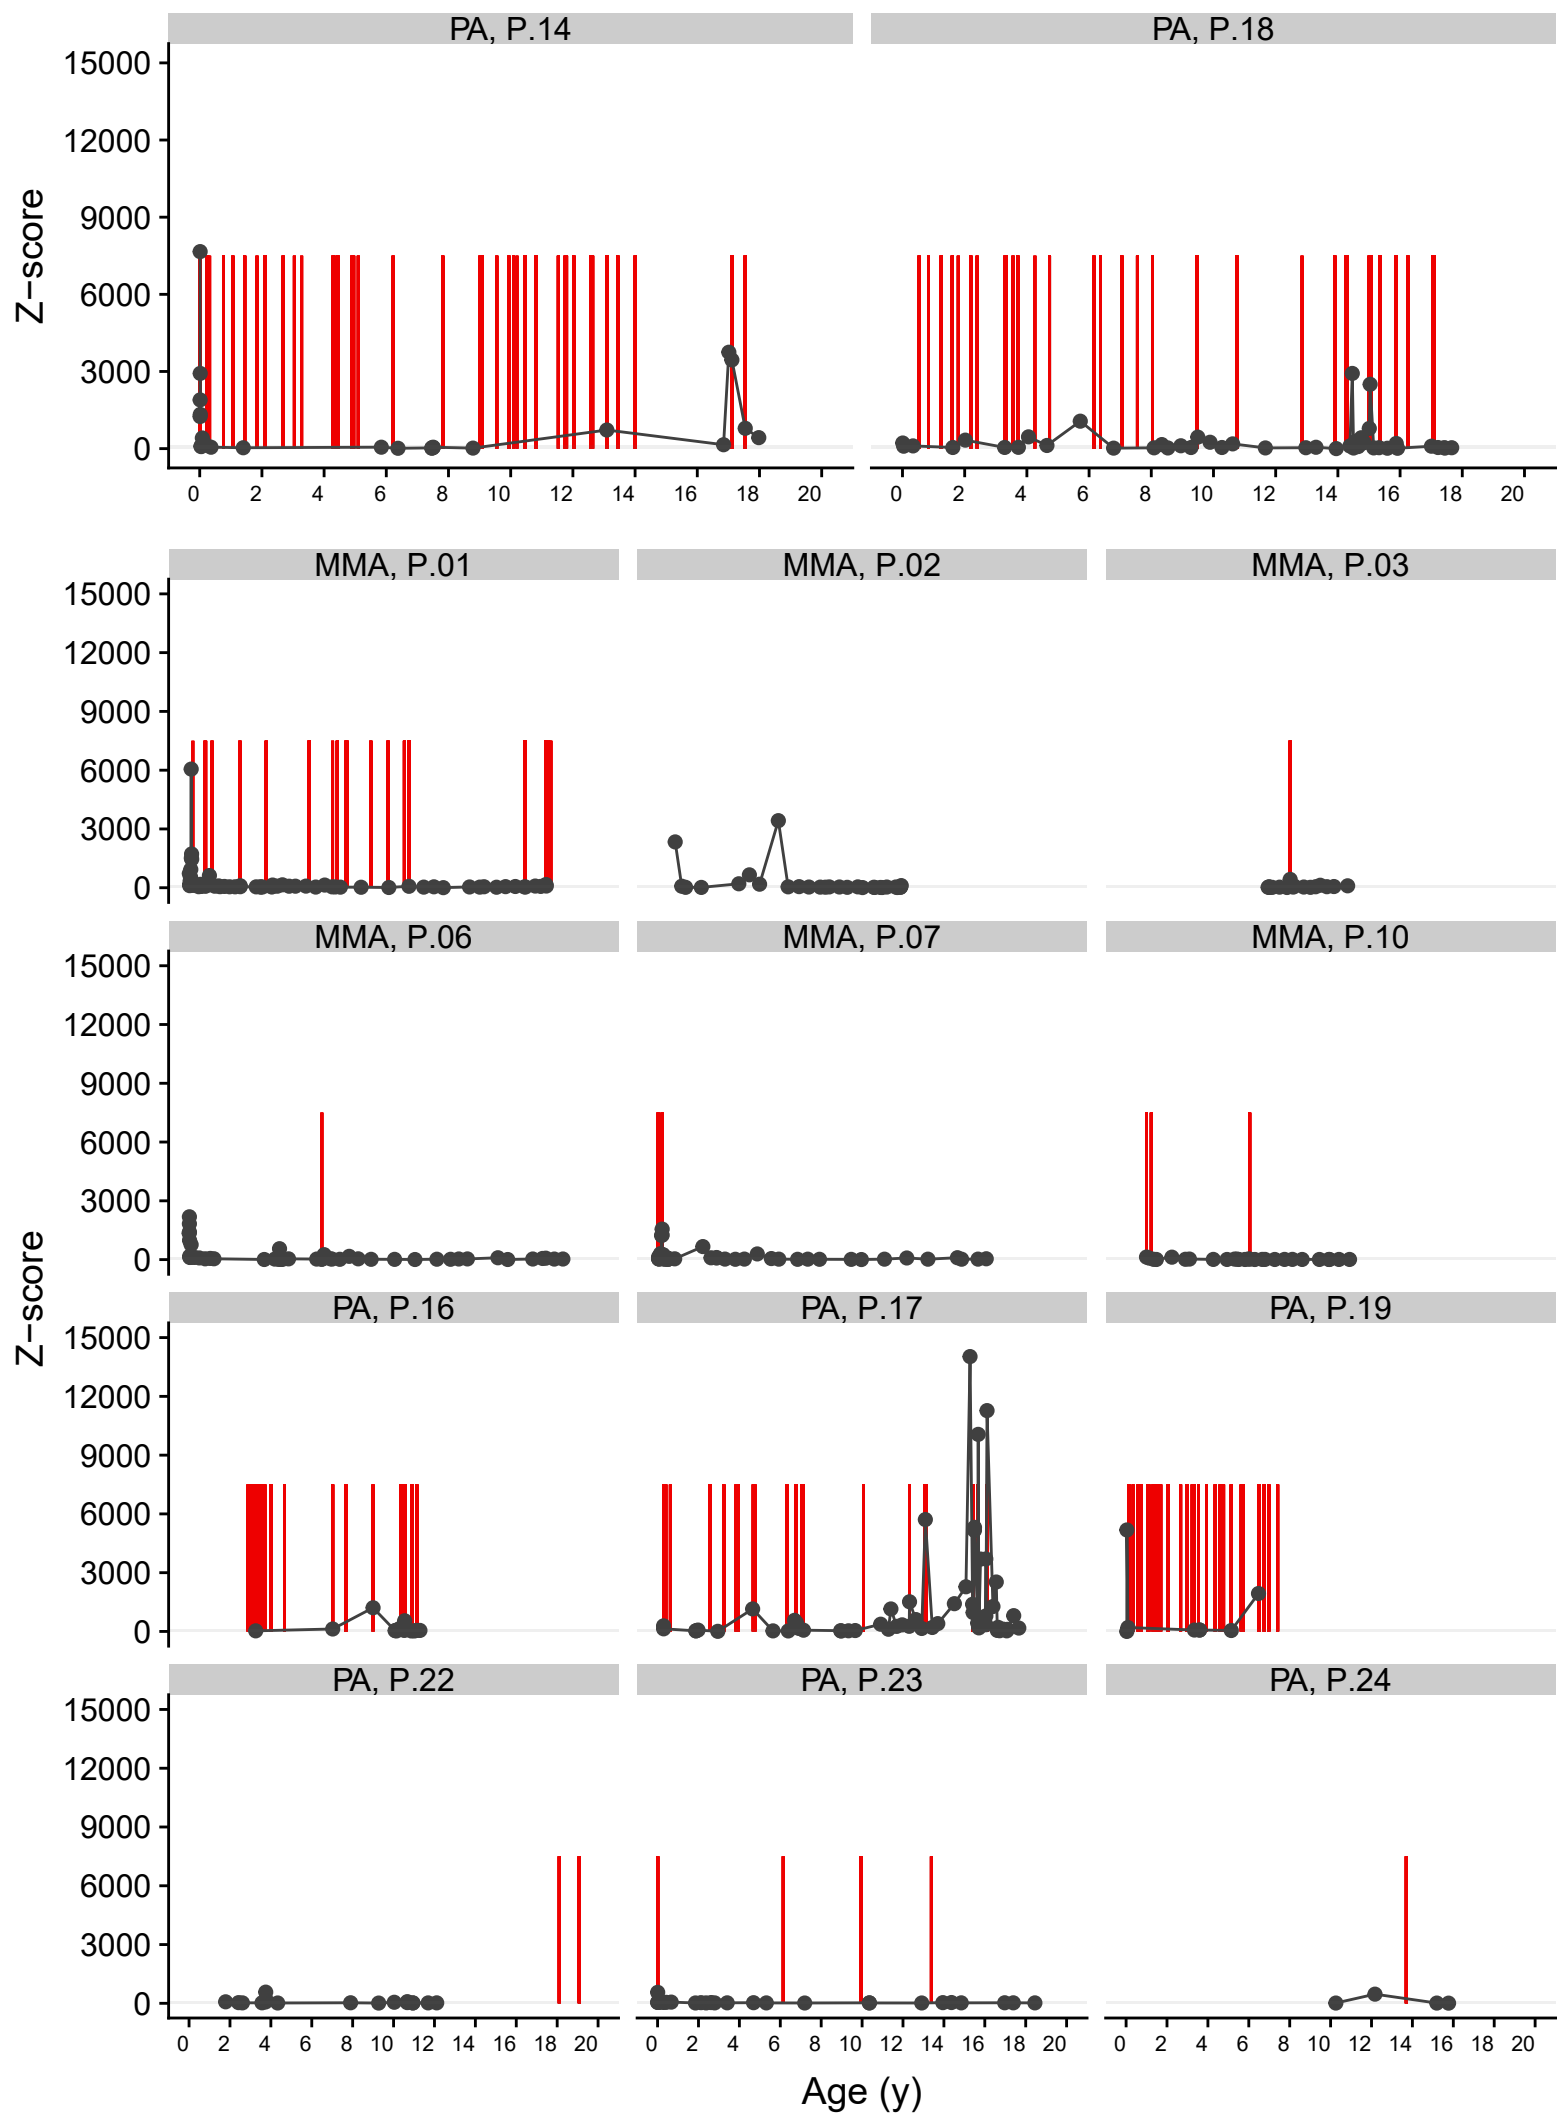

Lactate (PL)

— Acute metabolic decompensations  
— Plasma, targeted

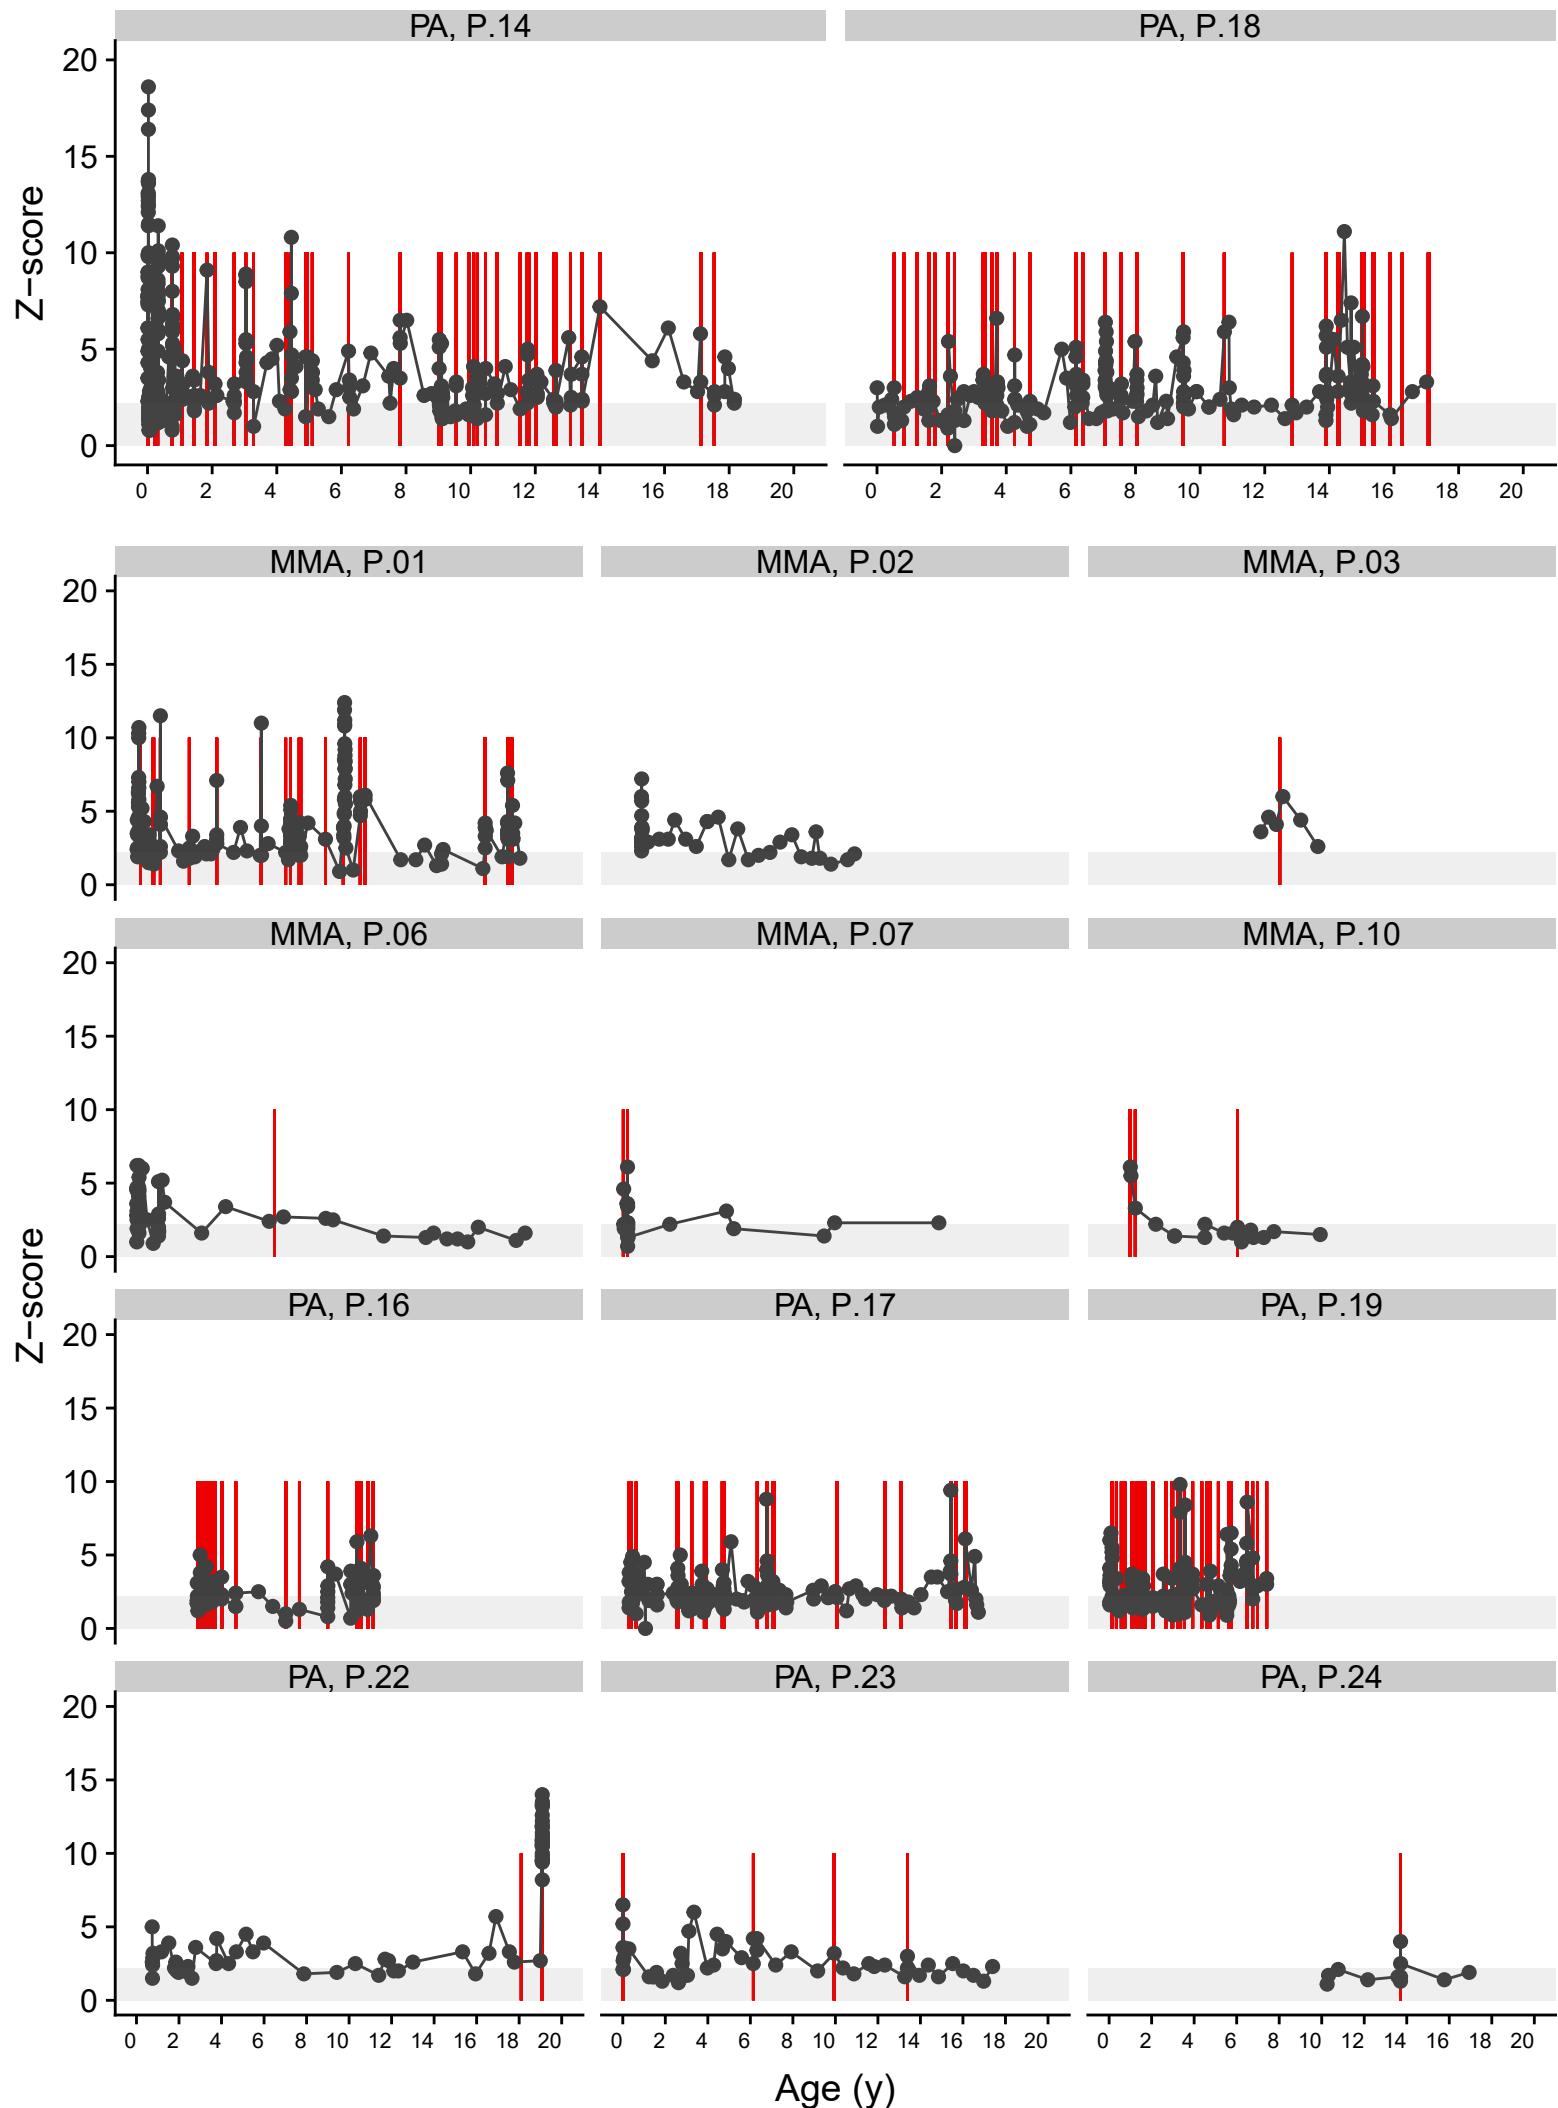



### 3-Hydroxybutyric acid (U)

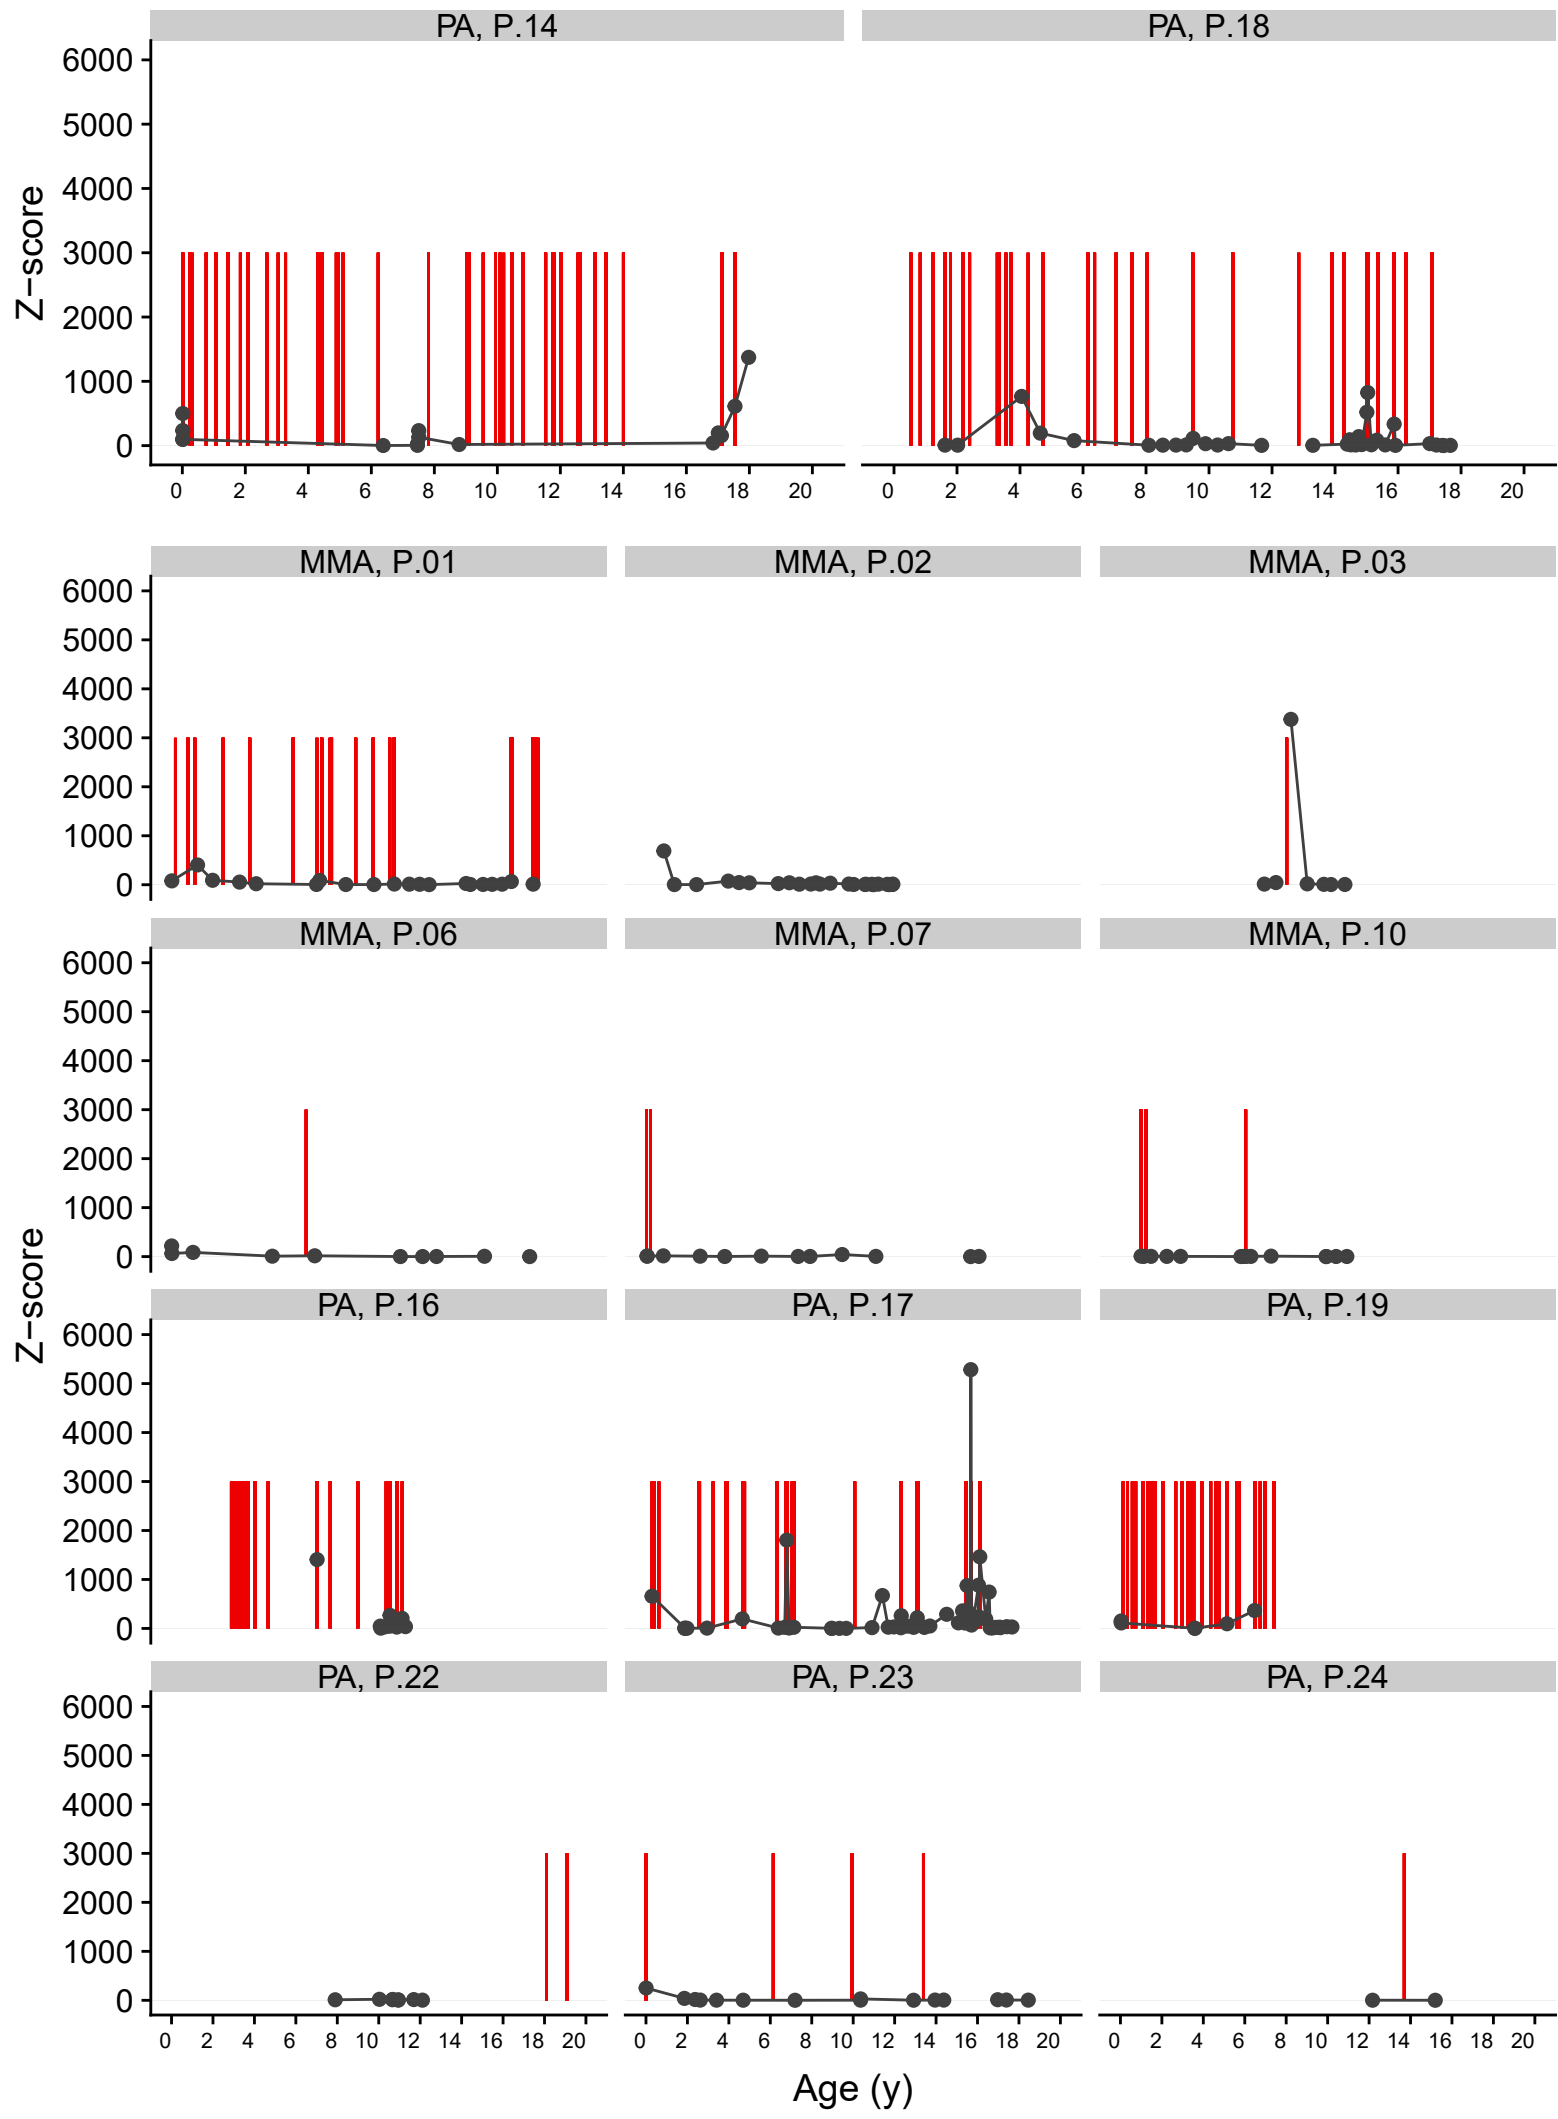

# Supplementary Figure 30

## 3-Hydroxyisovaleric acid (DI-HRMS)

- Acute metabolic decompensations
- Dried blood spots
- Plasma

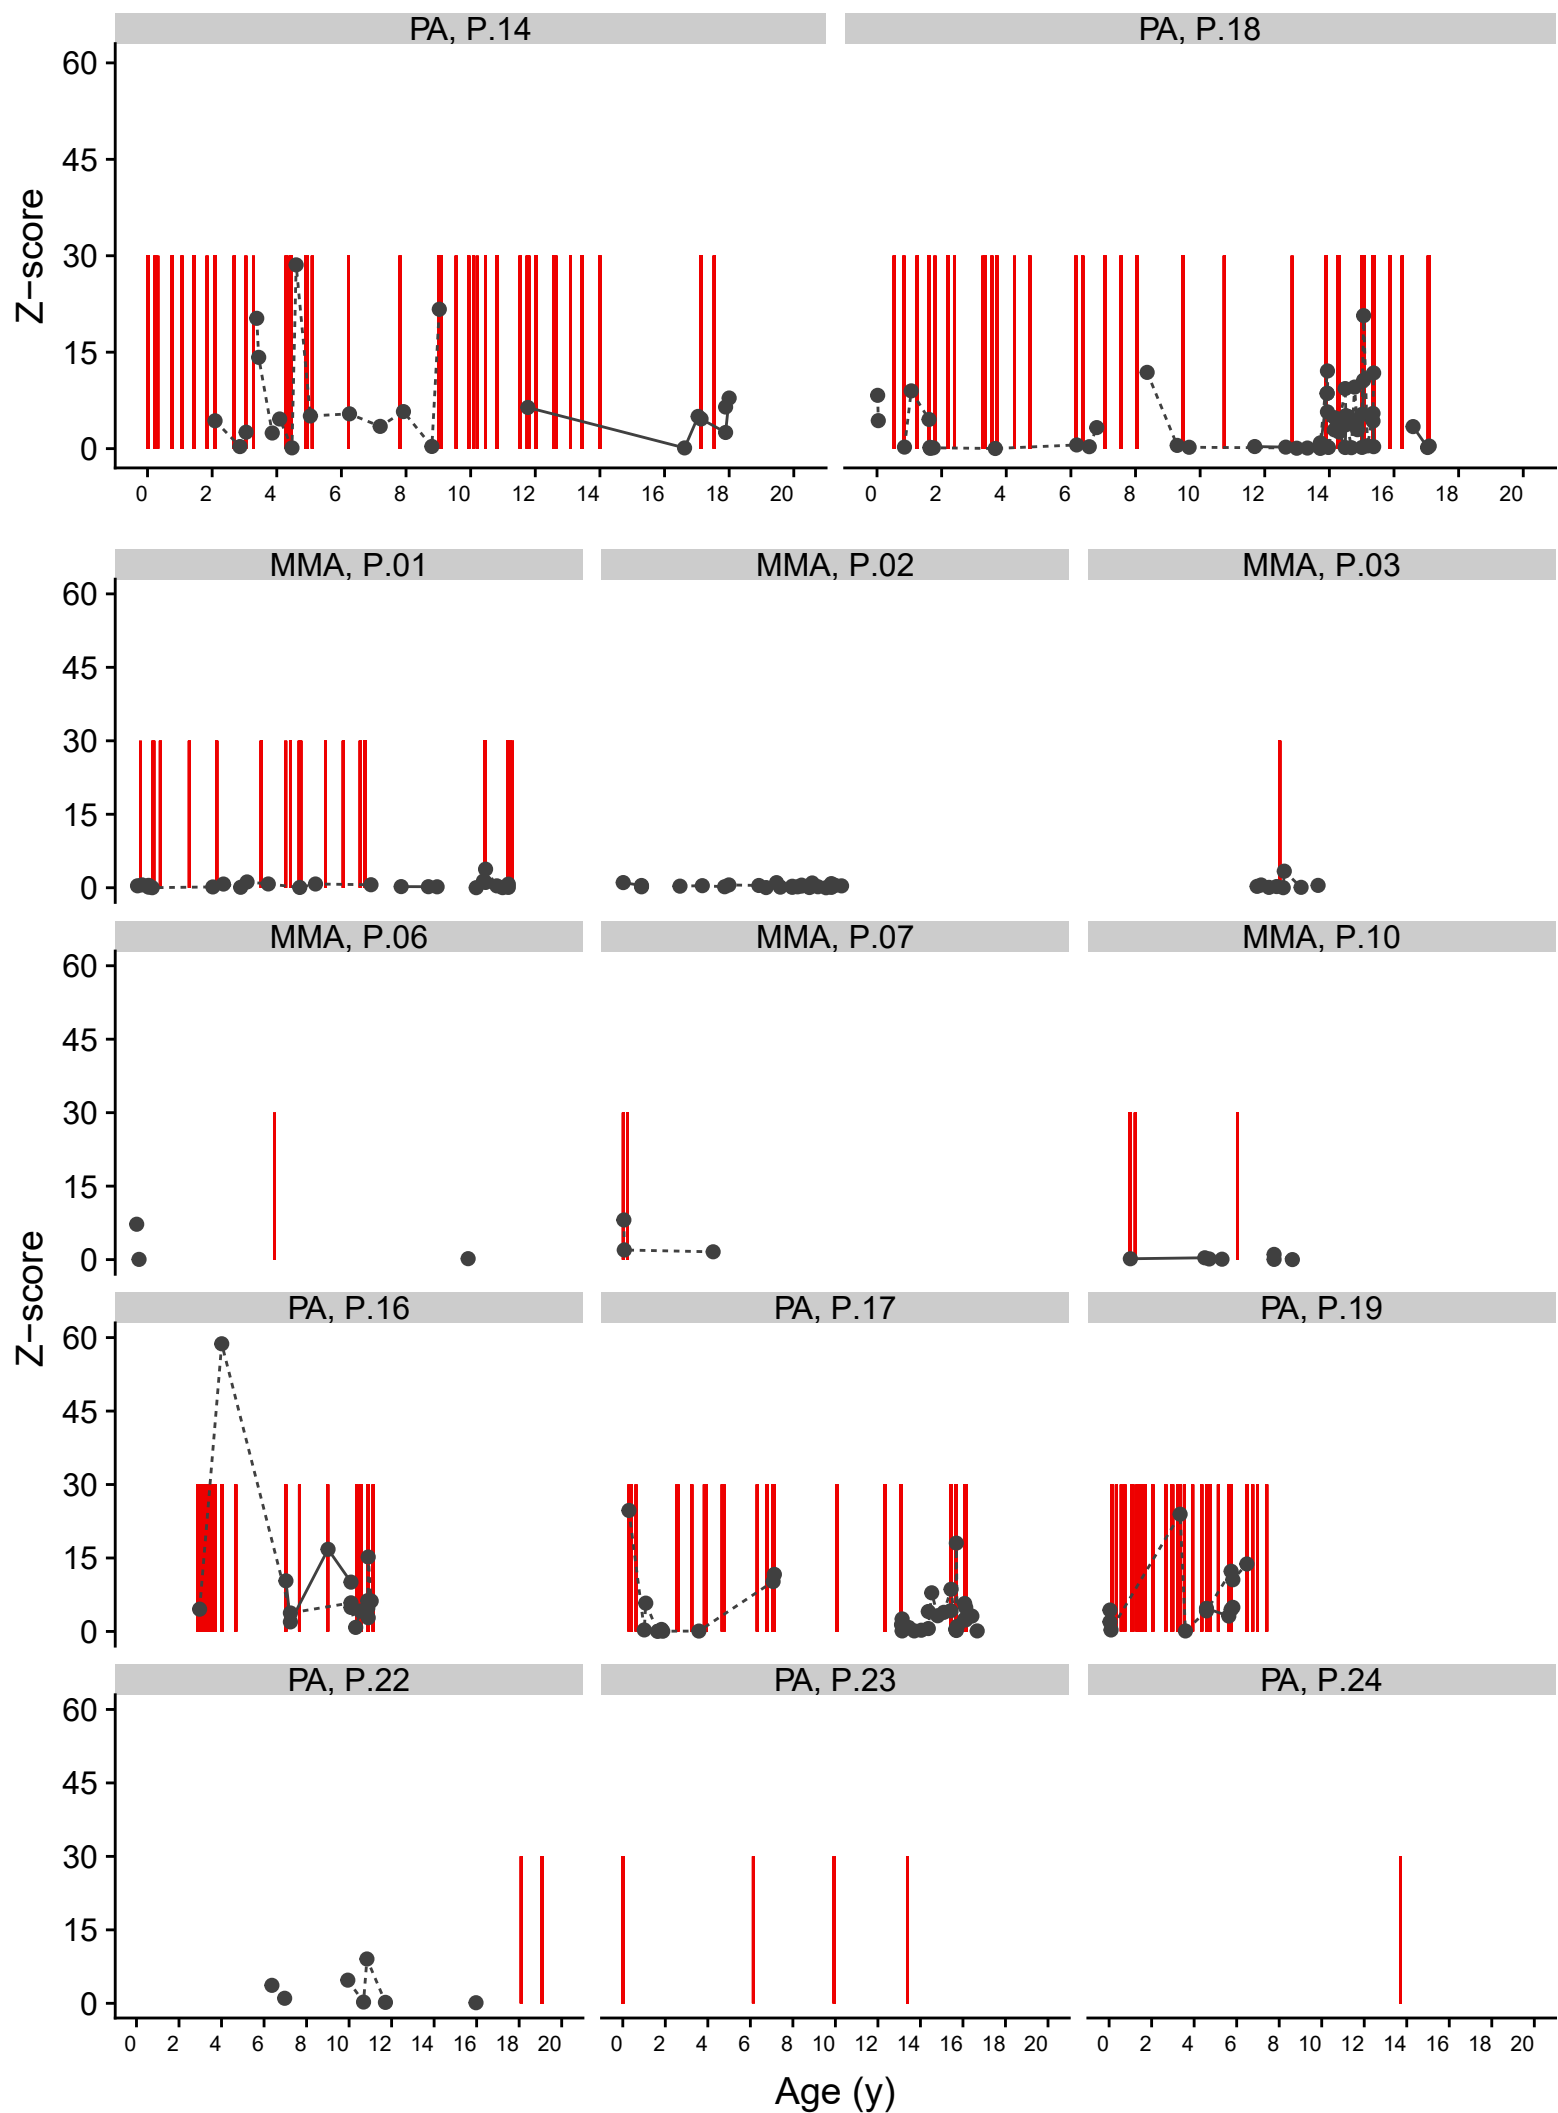

## 3-Hydroxyisovaleric acid (U)

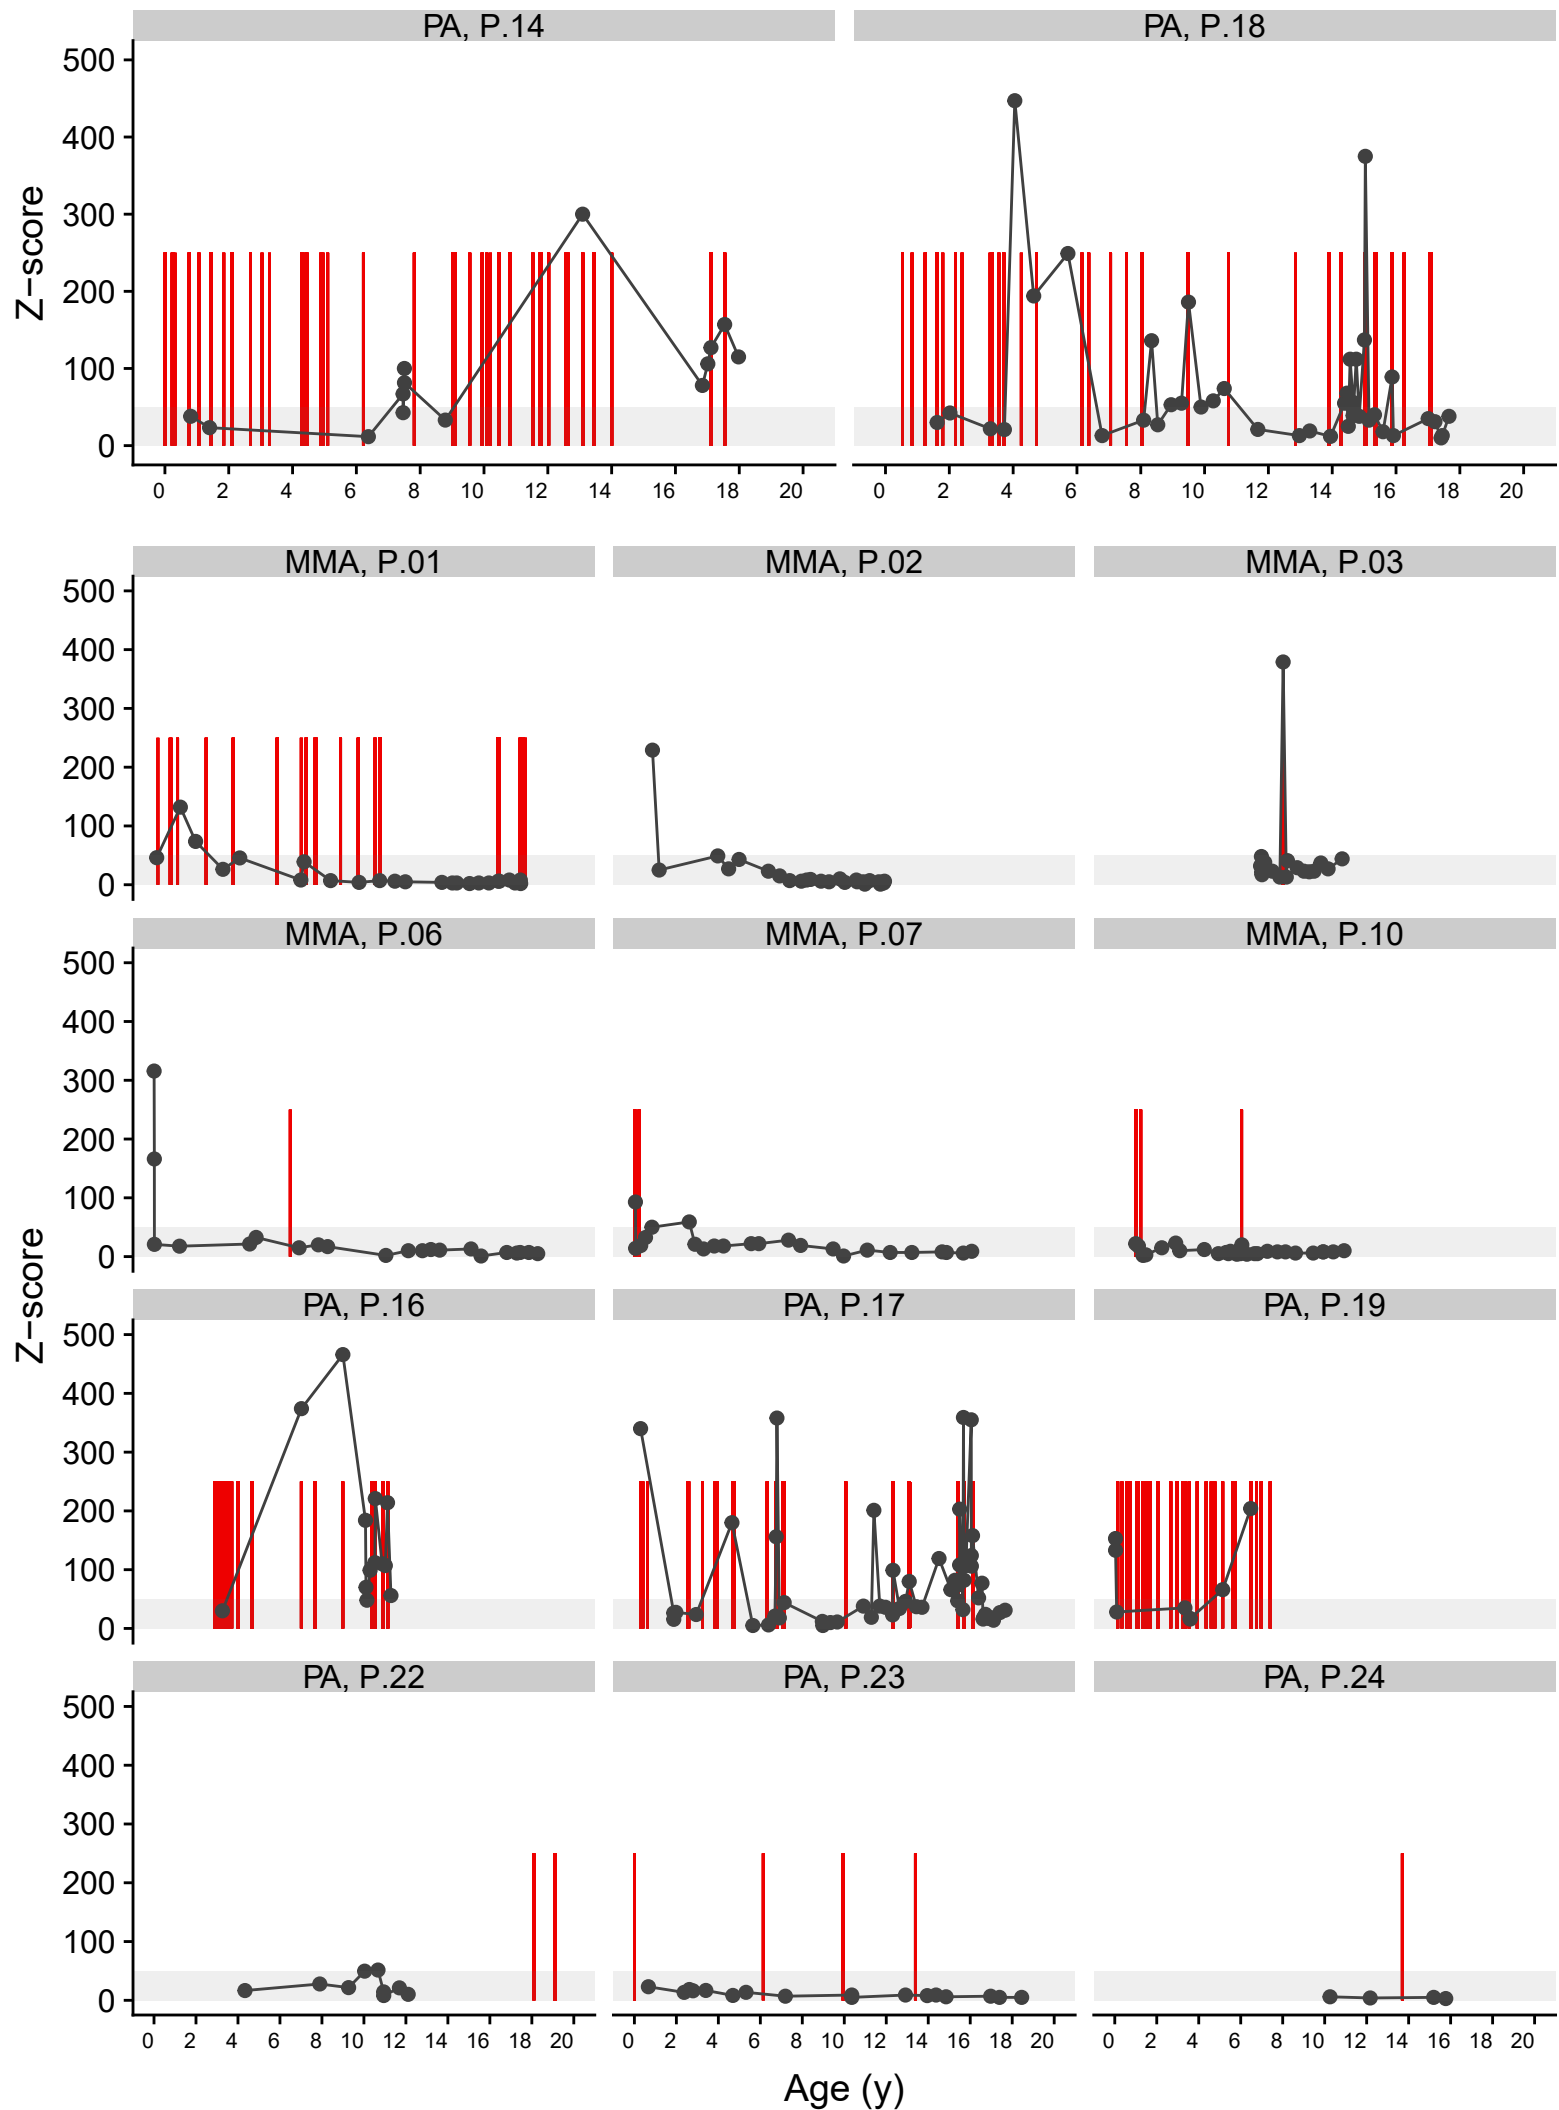

# Supplementary Figure 32

## Correlation to ammonia in plasma, from targeted metabolic assays

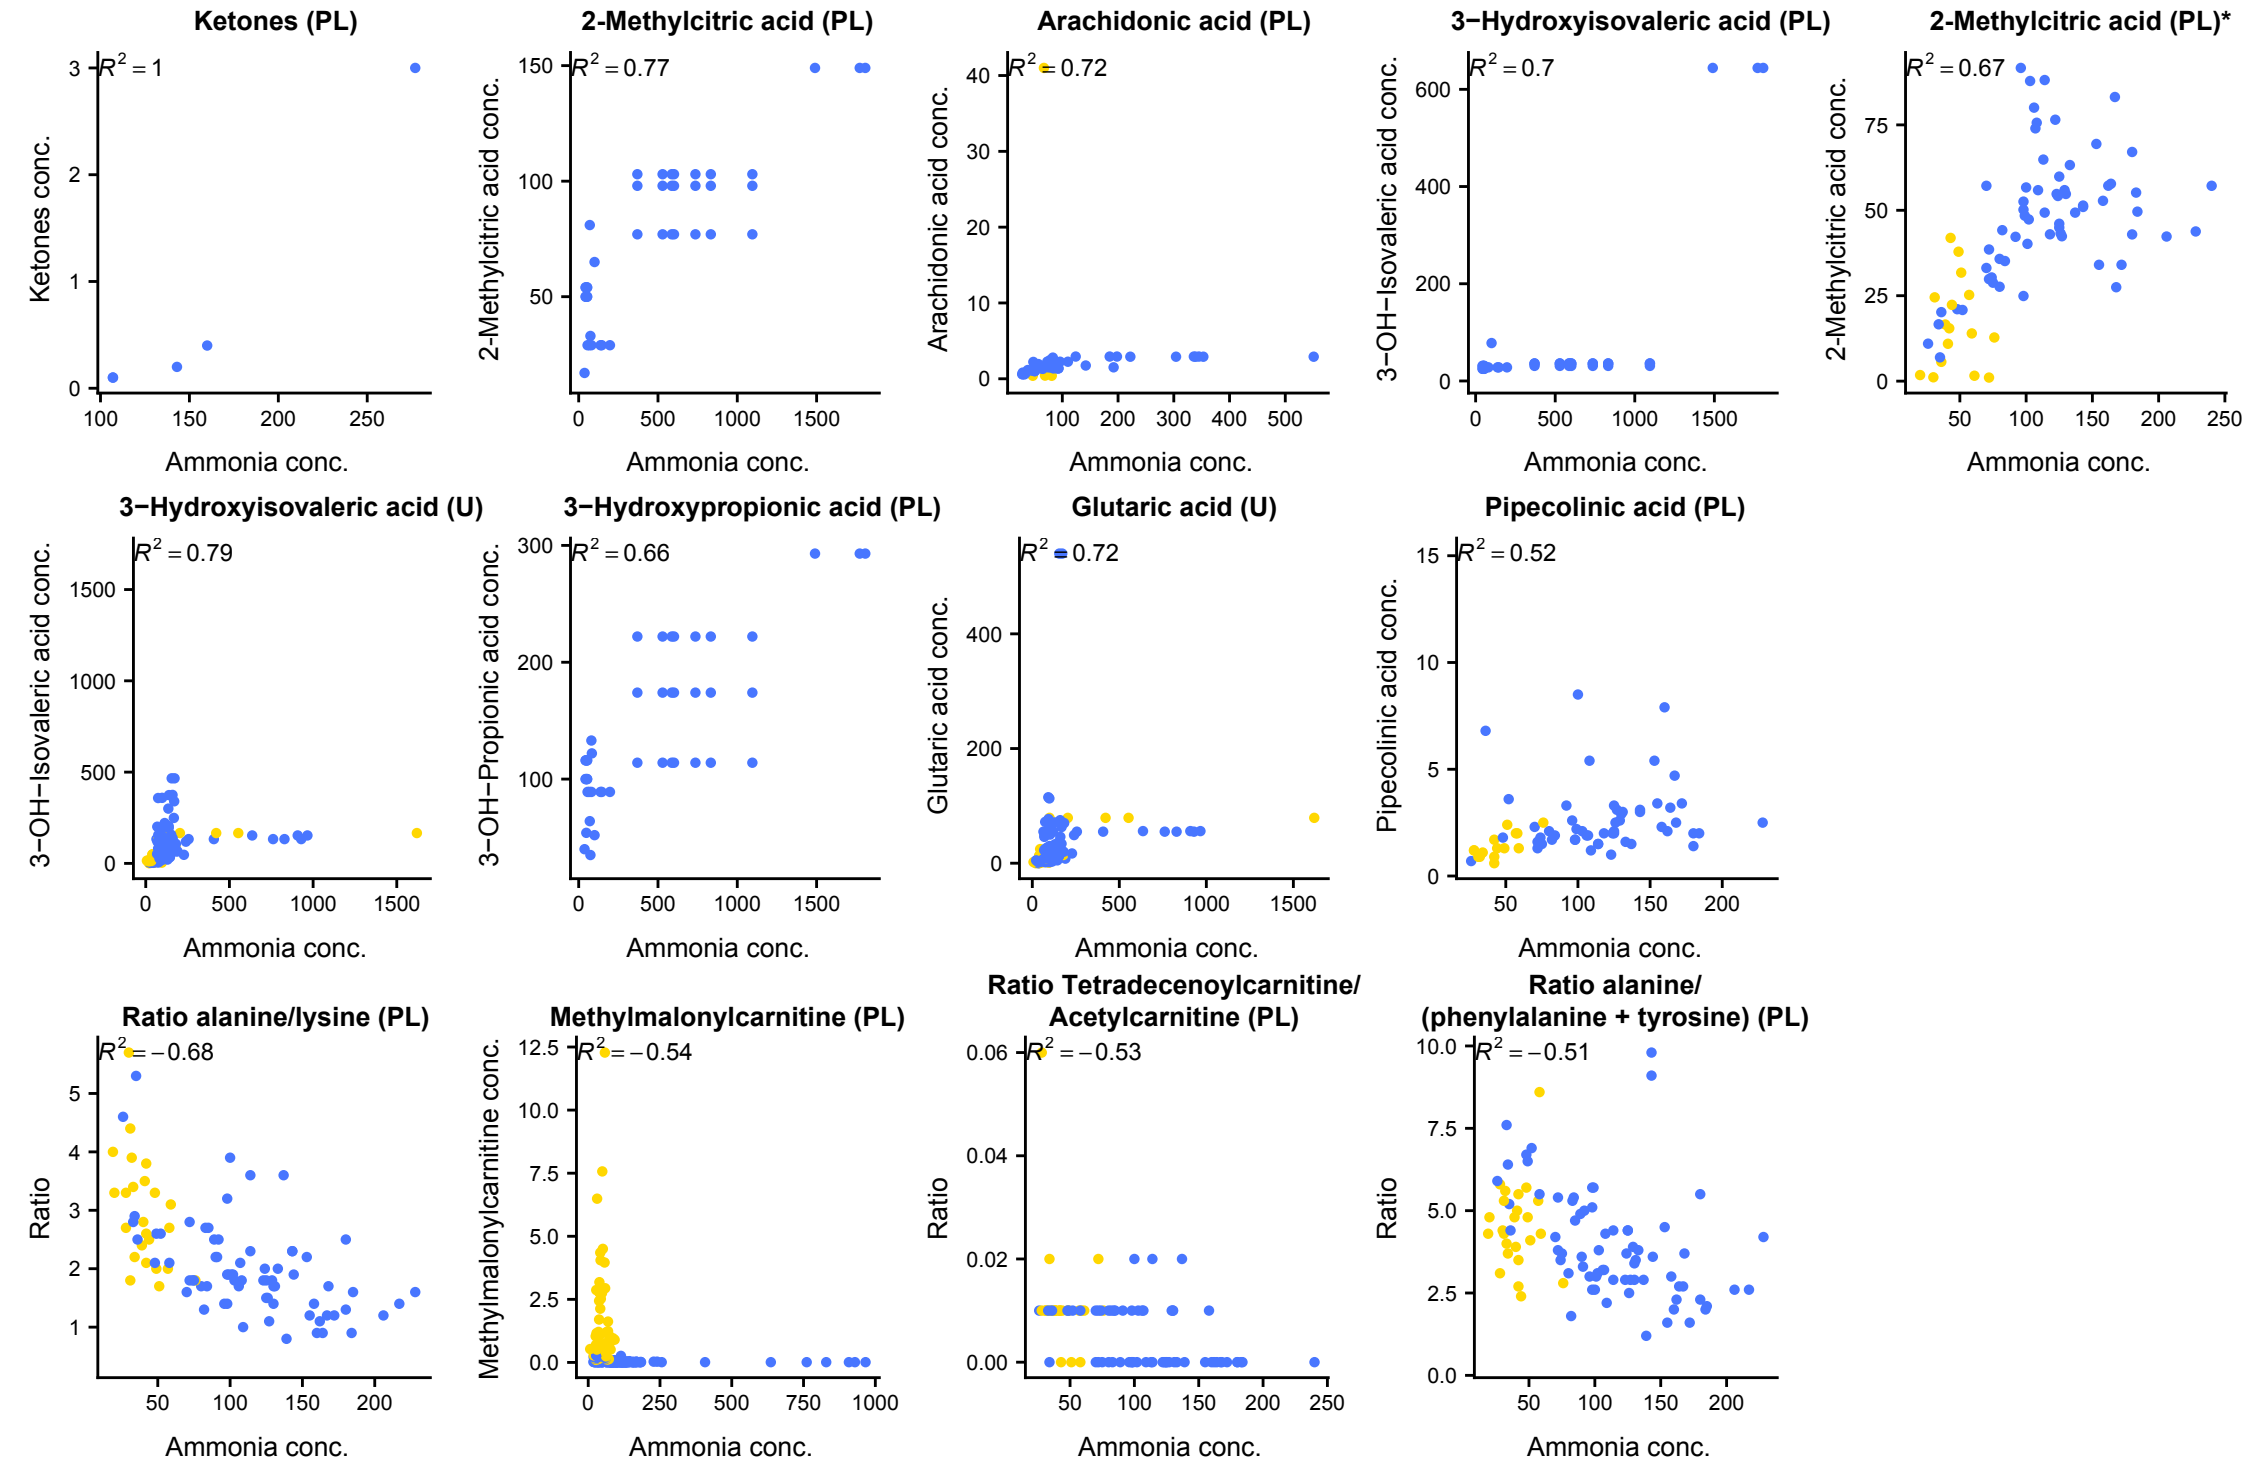

# Supplementary Figure 33

## Correlation to Ammonia in plasma, from DI-HRMS analysis

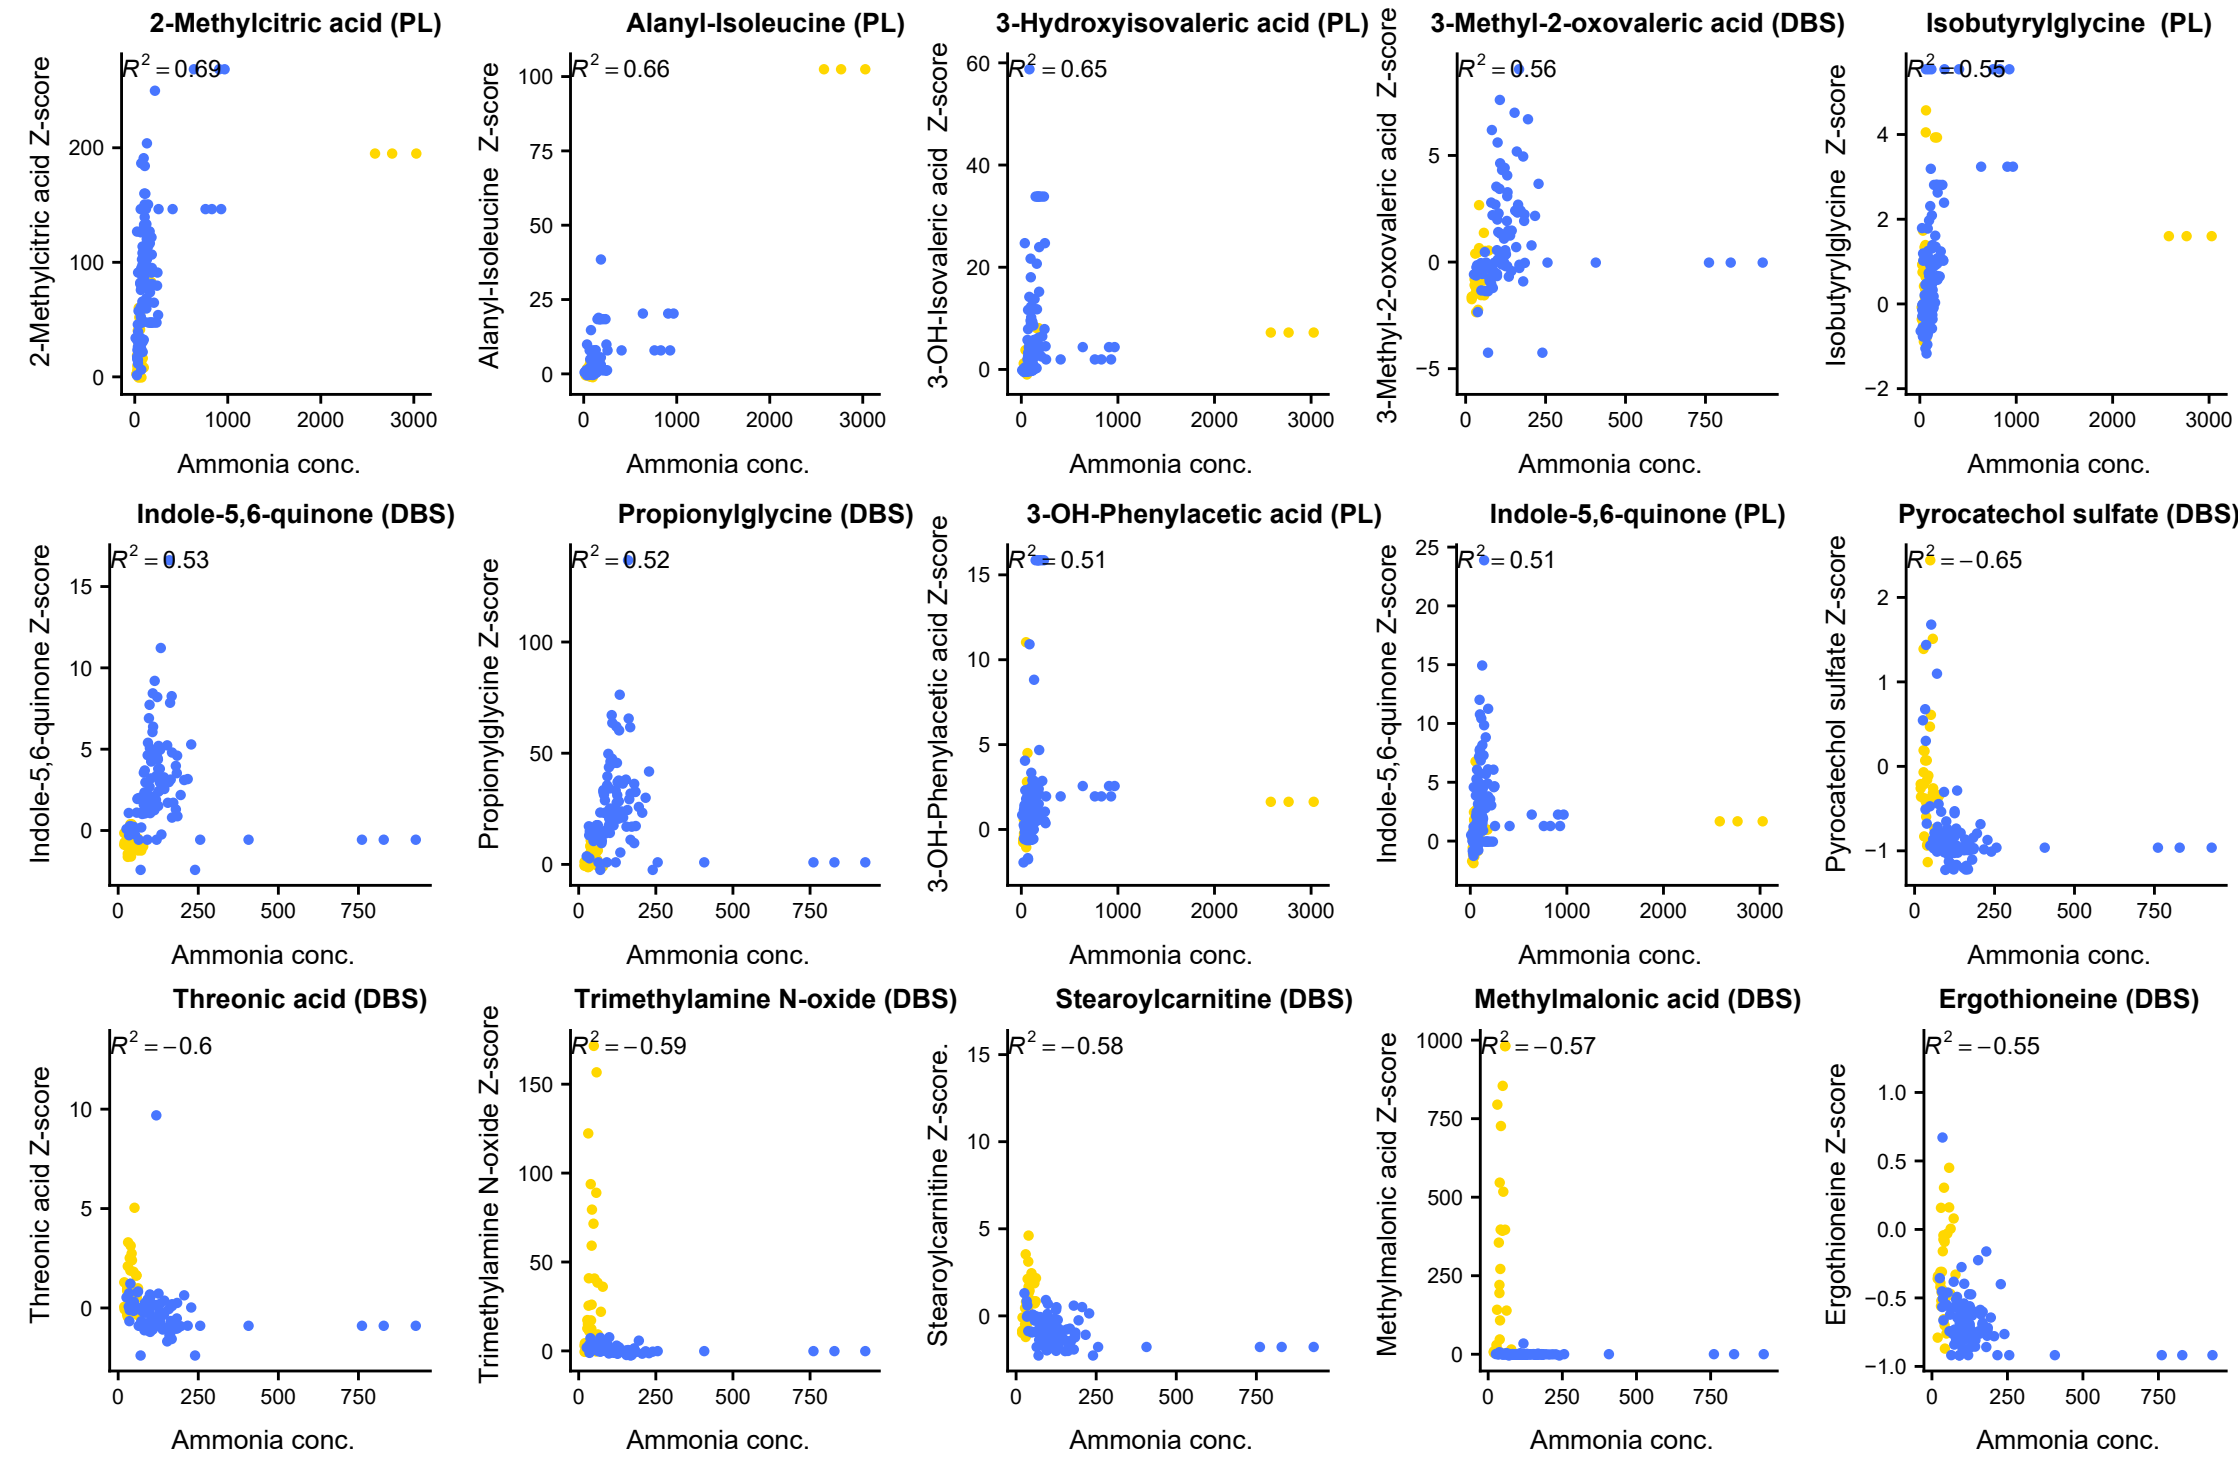

Histidine (PL)

— Acute metabolic decompensations  
— Plasma, targeted

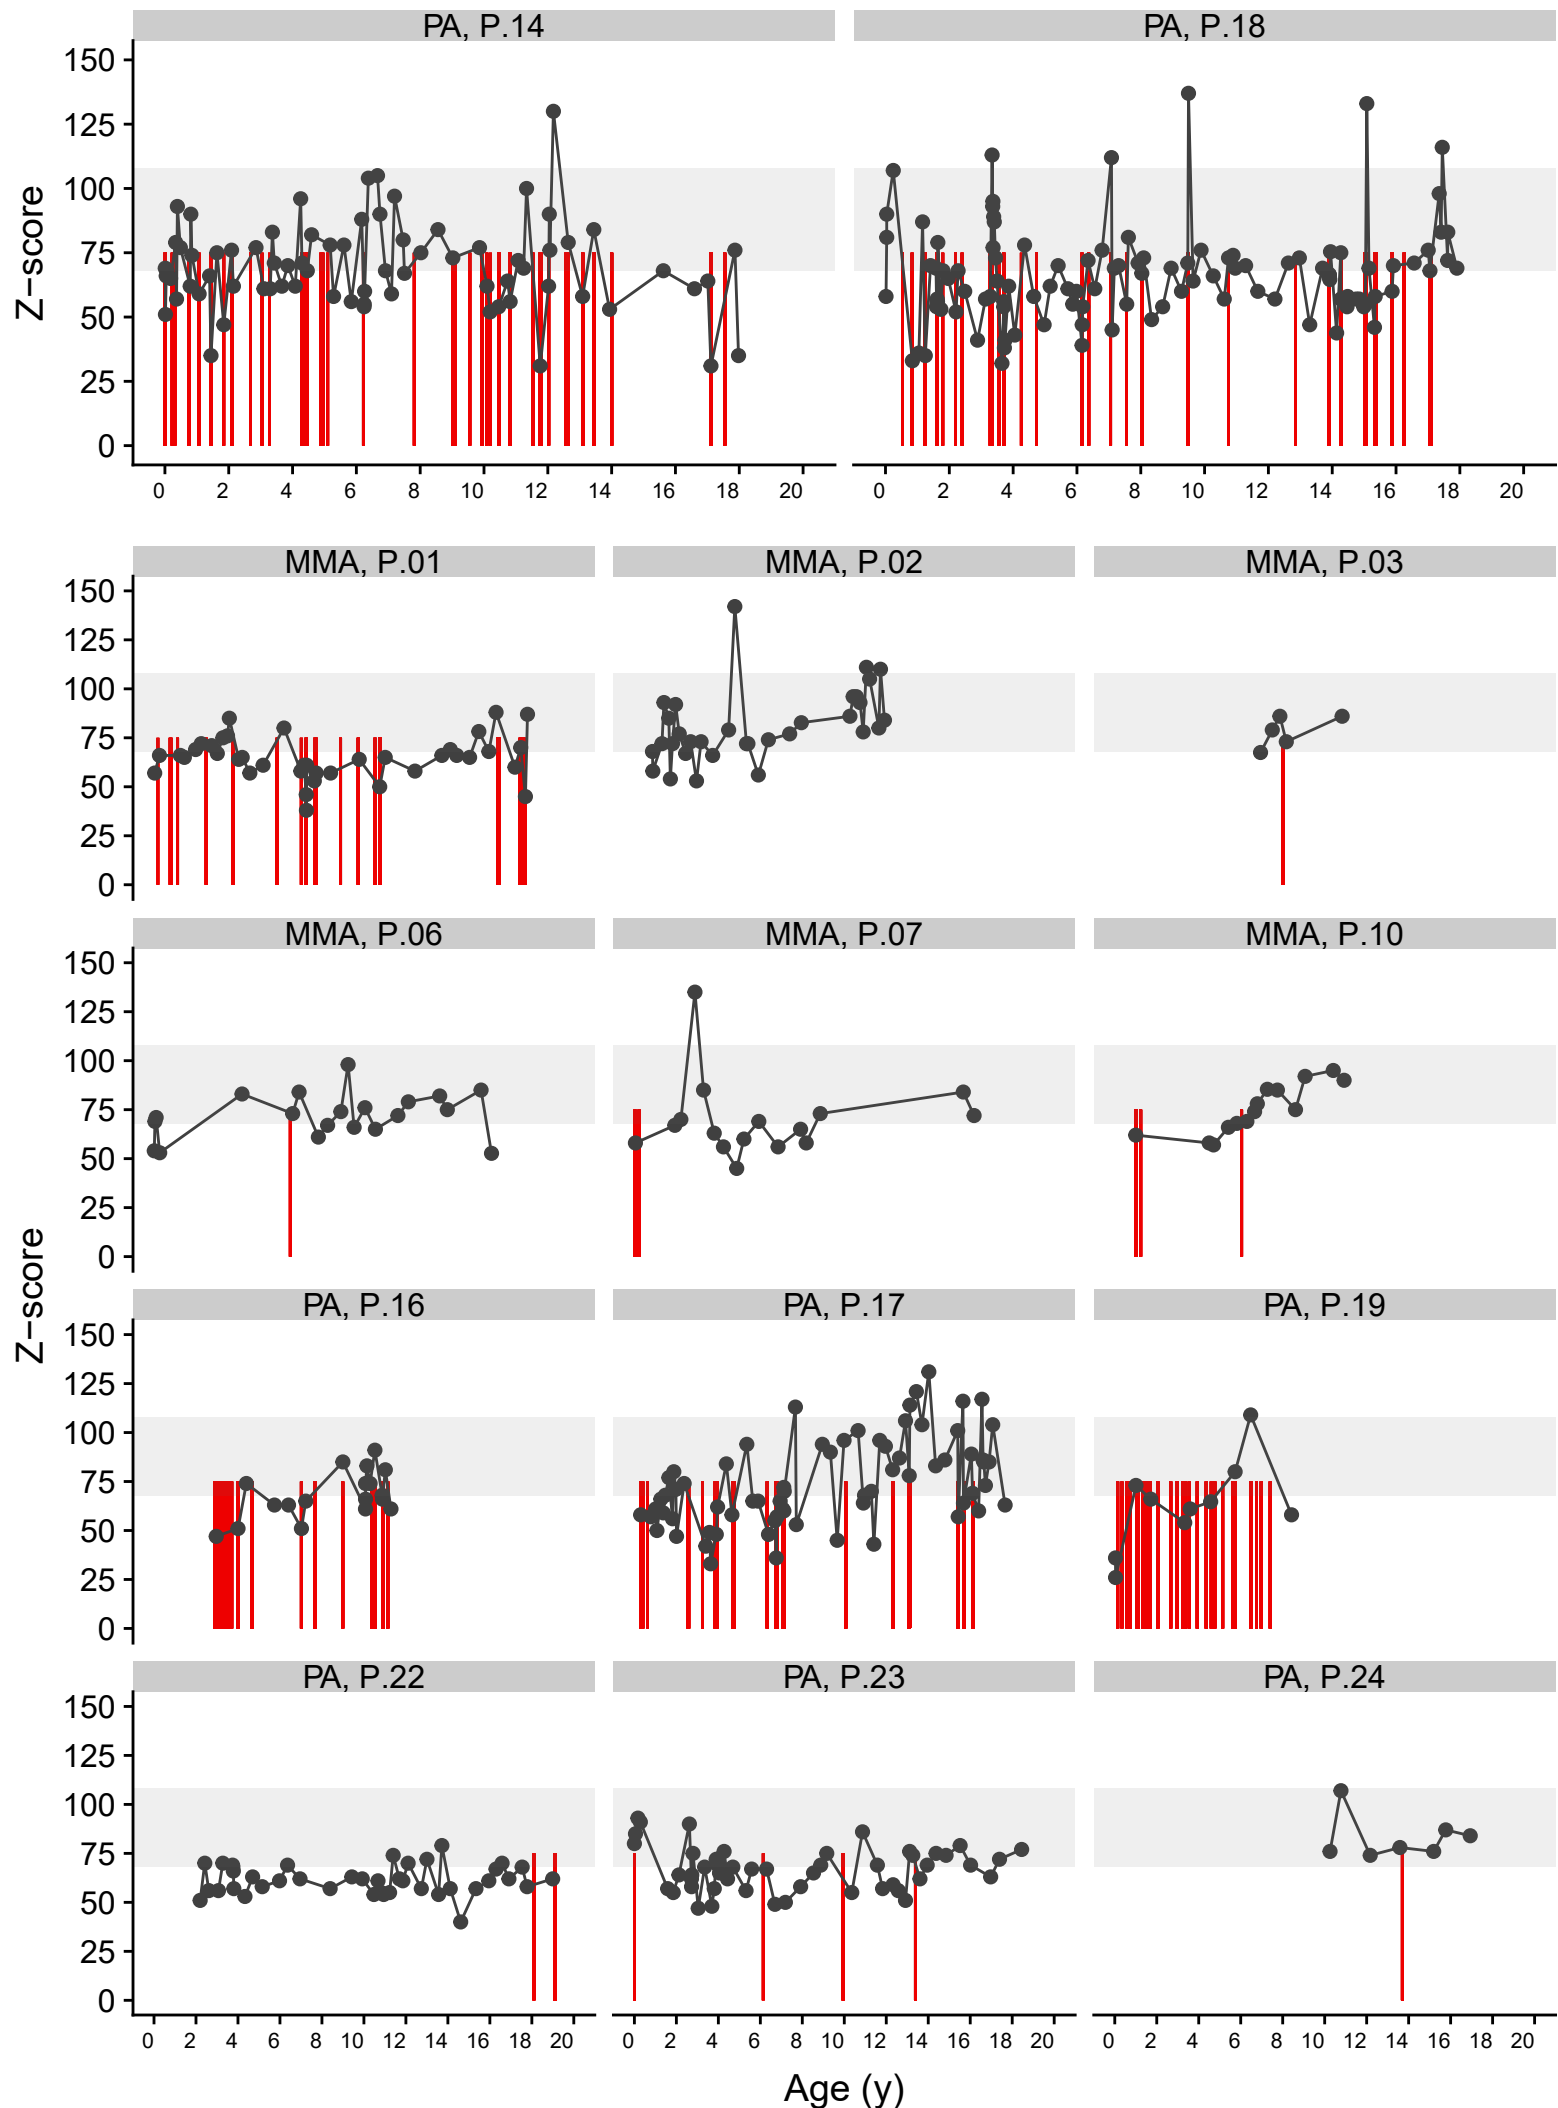

# Supplementary Figure 35

## LysoPC(15:0) (DI-HRMS)

- Acute metabolic decompensations
- Dried blood spots
- Plasma

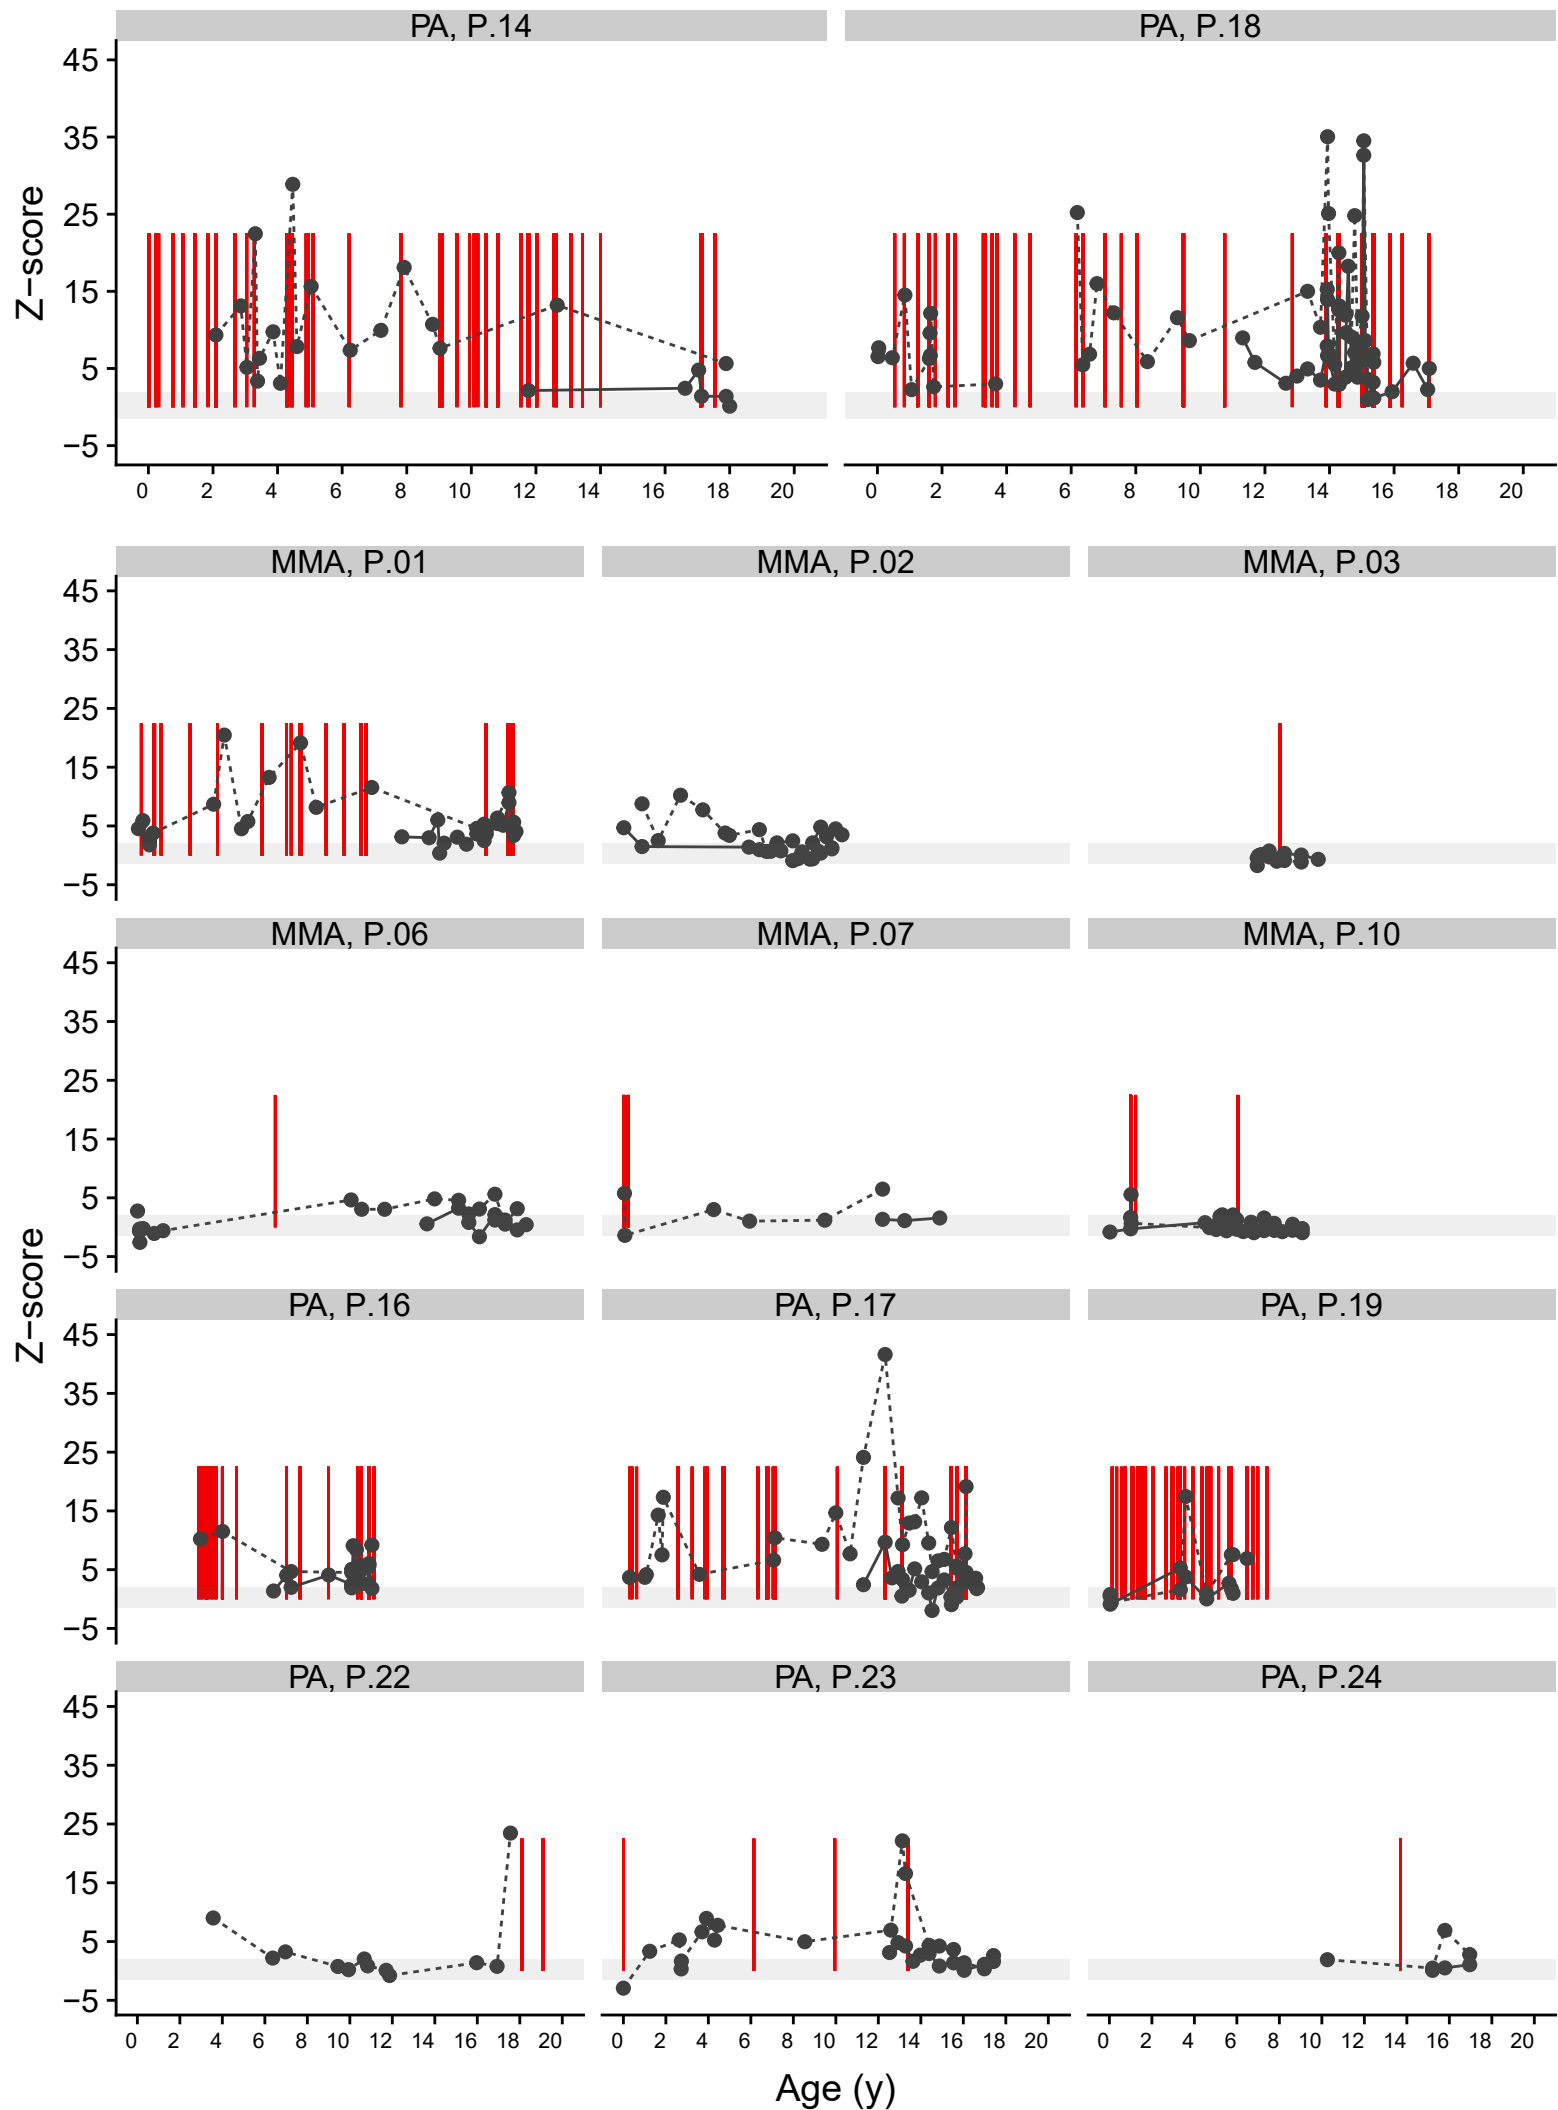

## LysoPC(17:0) (DI-HRMS)

— Acute metabolic decompensations  
— Dried blood spots  
- - - Plasma

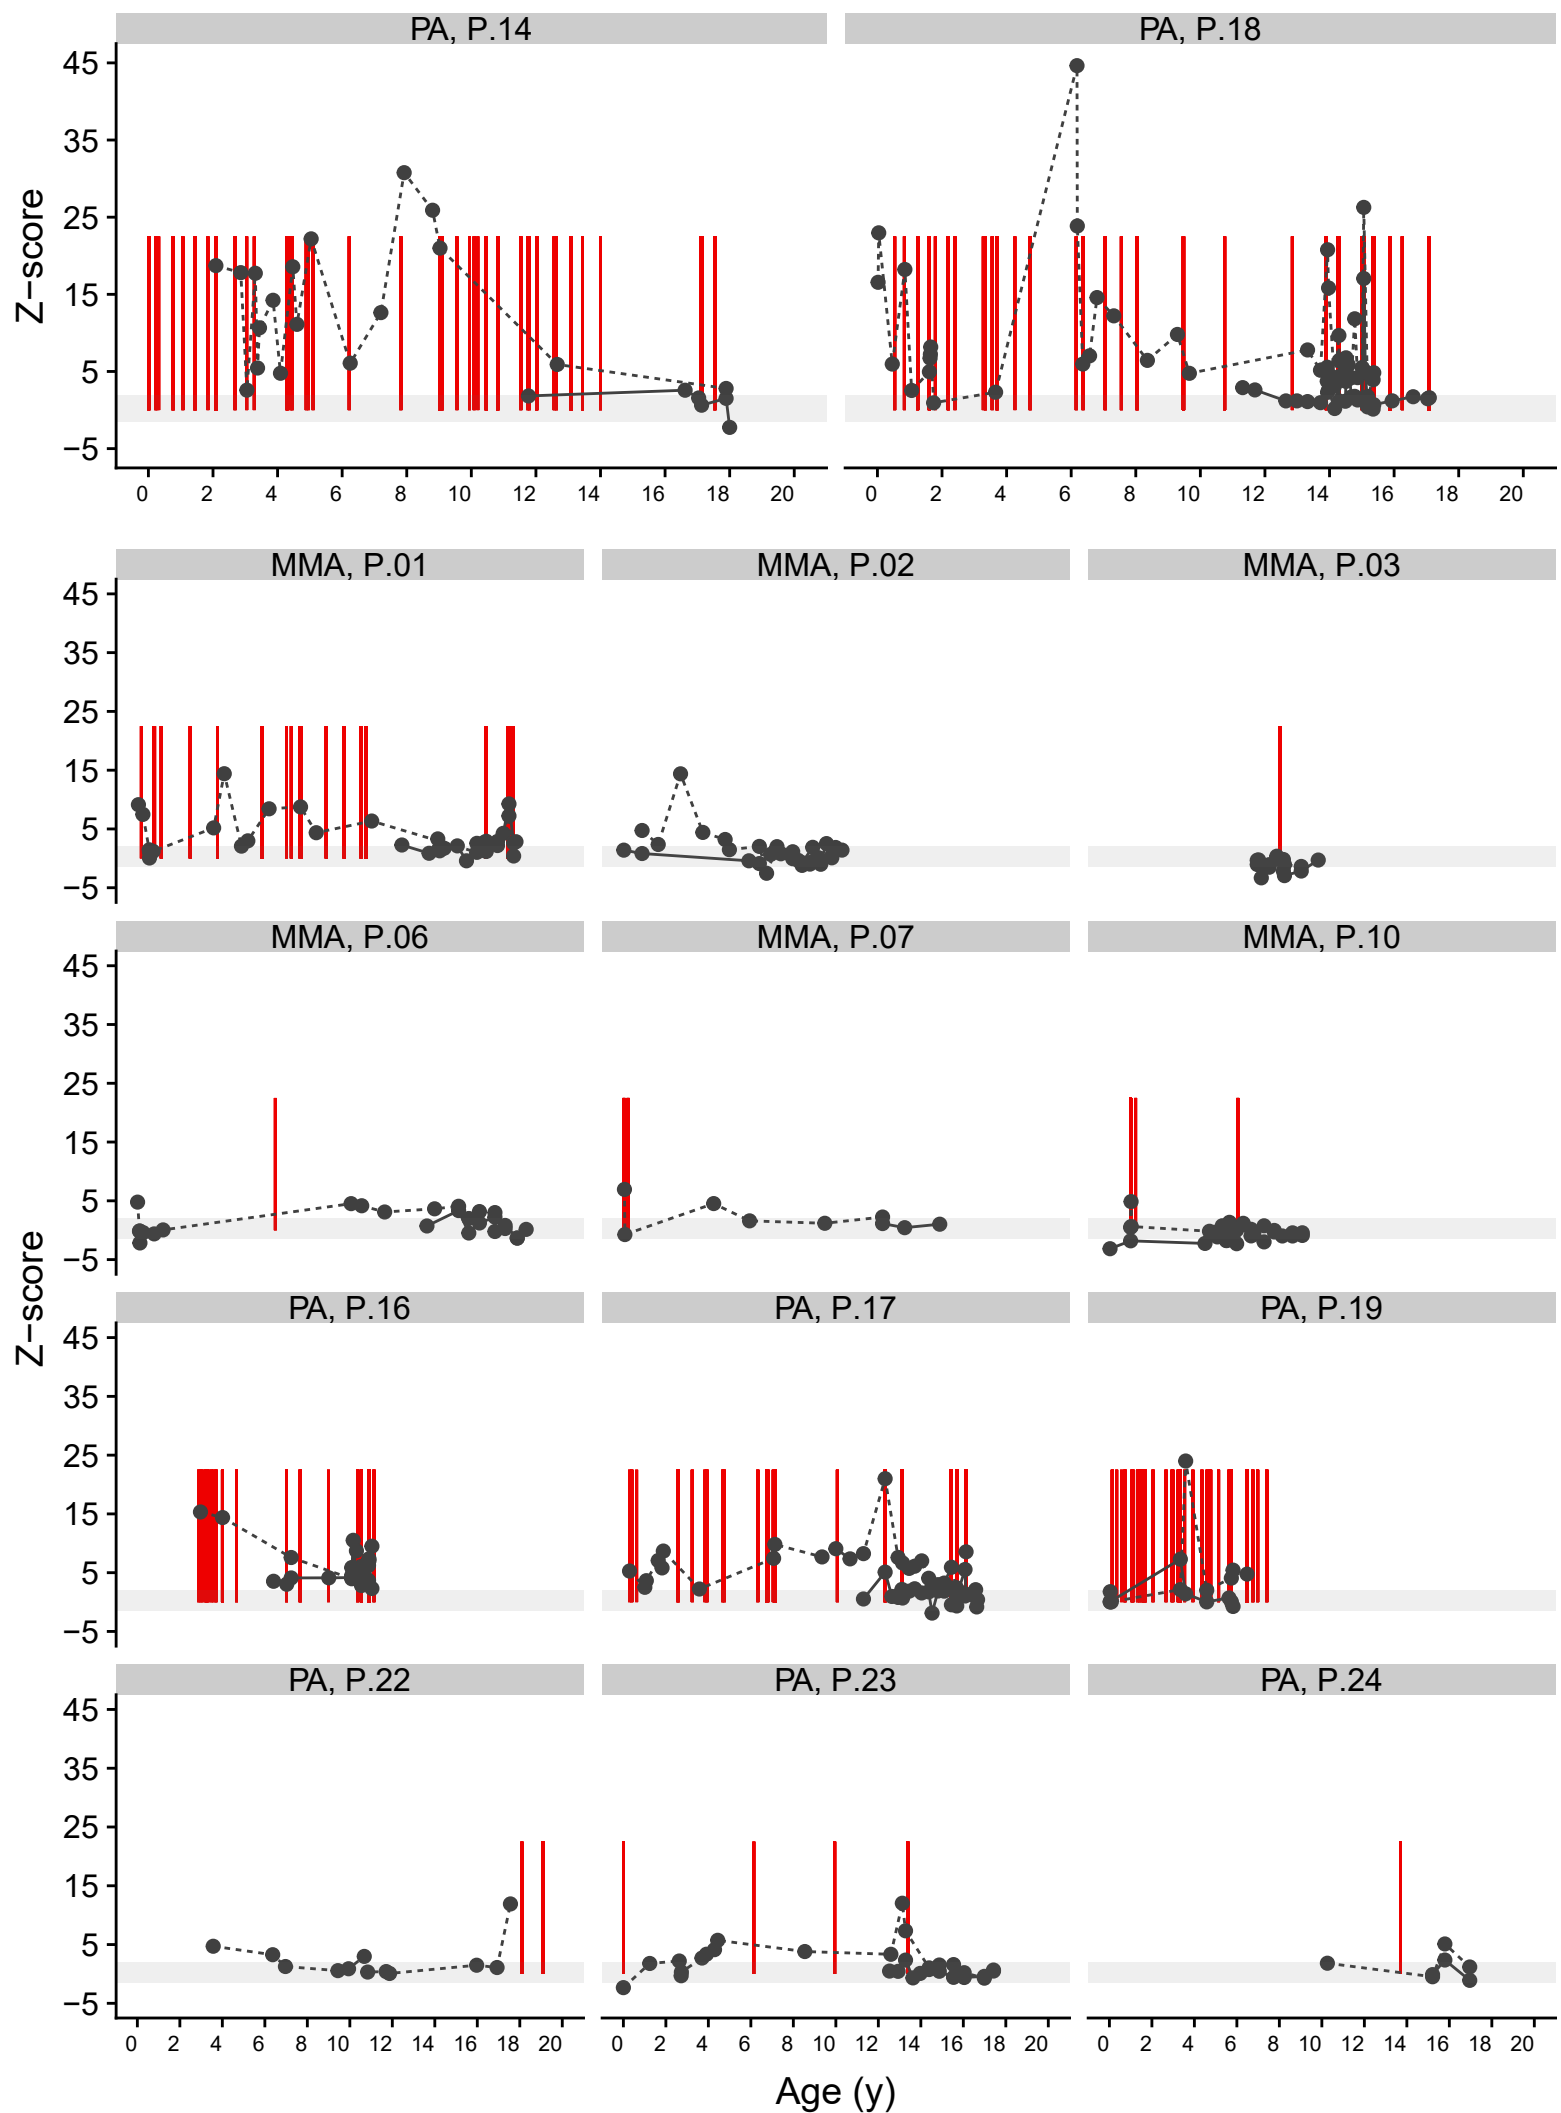



Supplementary Figure 37

2-Amino-3-phosphonopropionic acid (DI-HRMS)

- Acute metabolic decompensations
- Dried blood spots
- - - Plasma

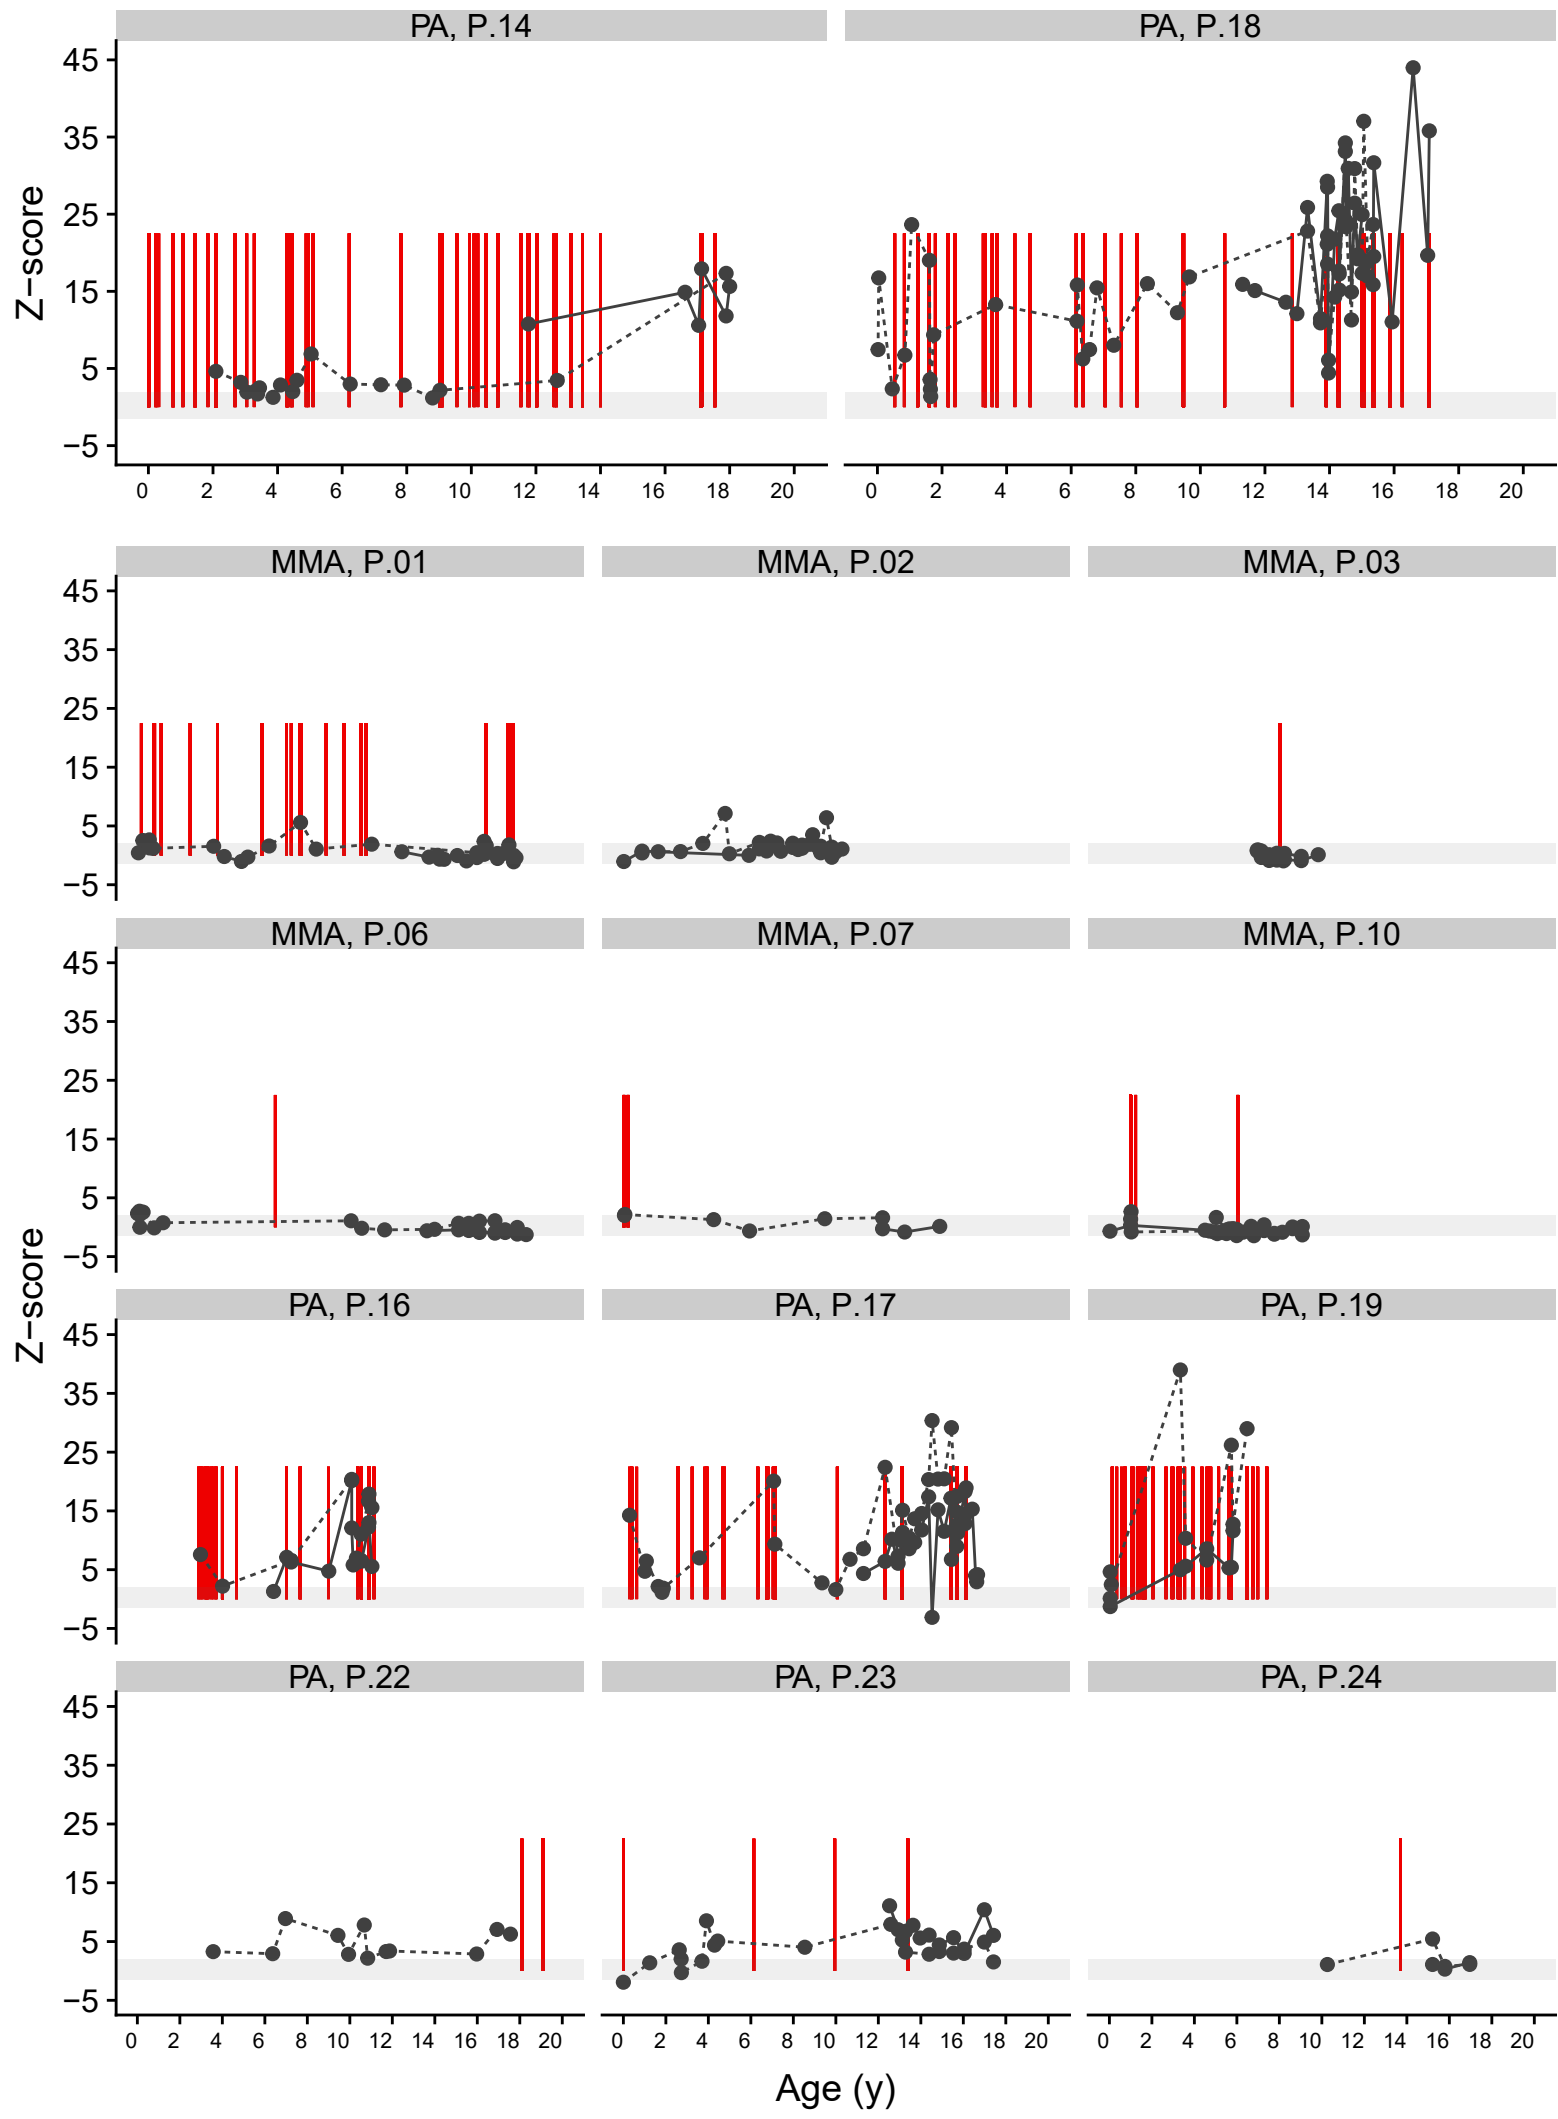

Propionic acid (DI-HRMS)

- Acute metabolic decompensations
- Dried blood spots
- Plasma

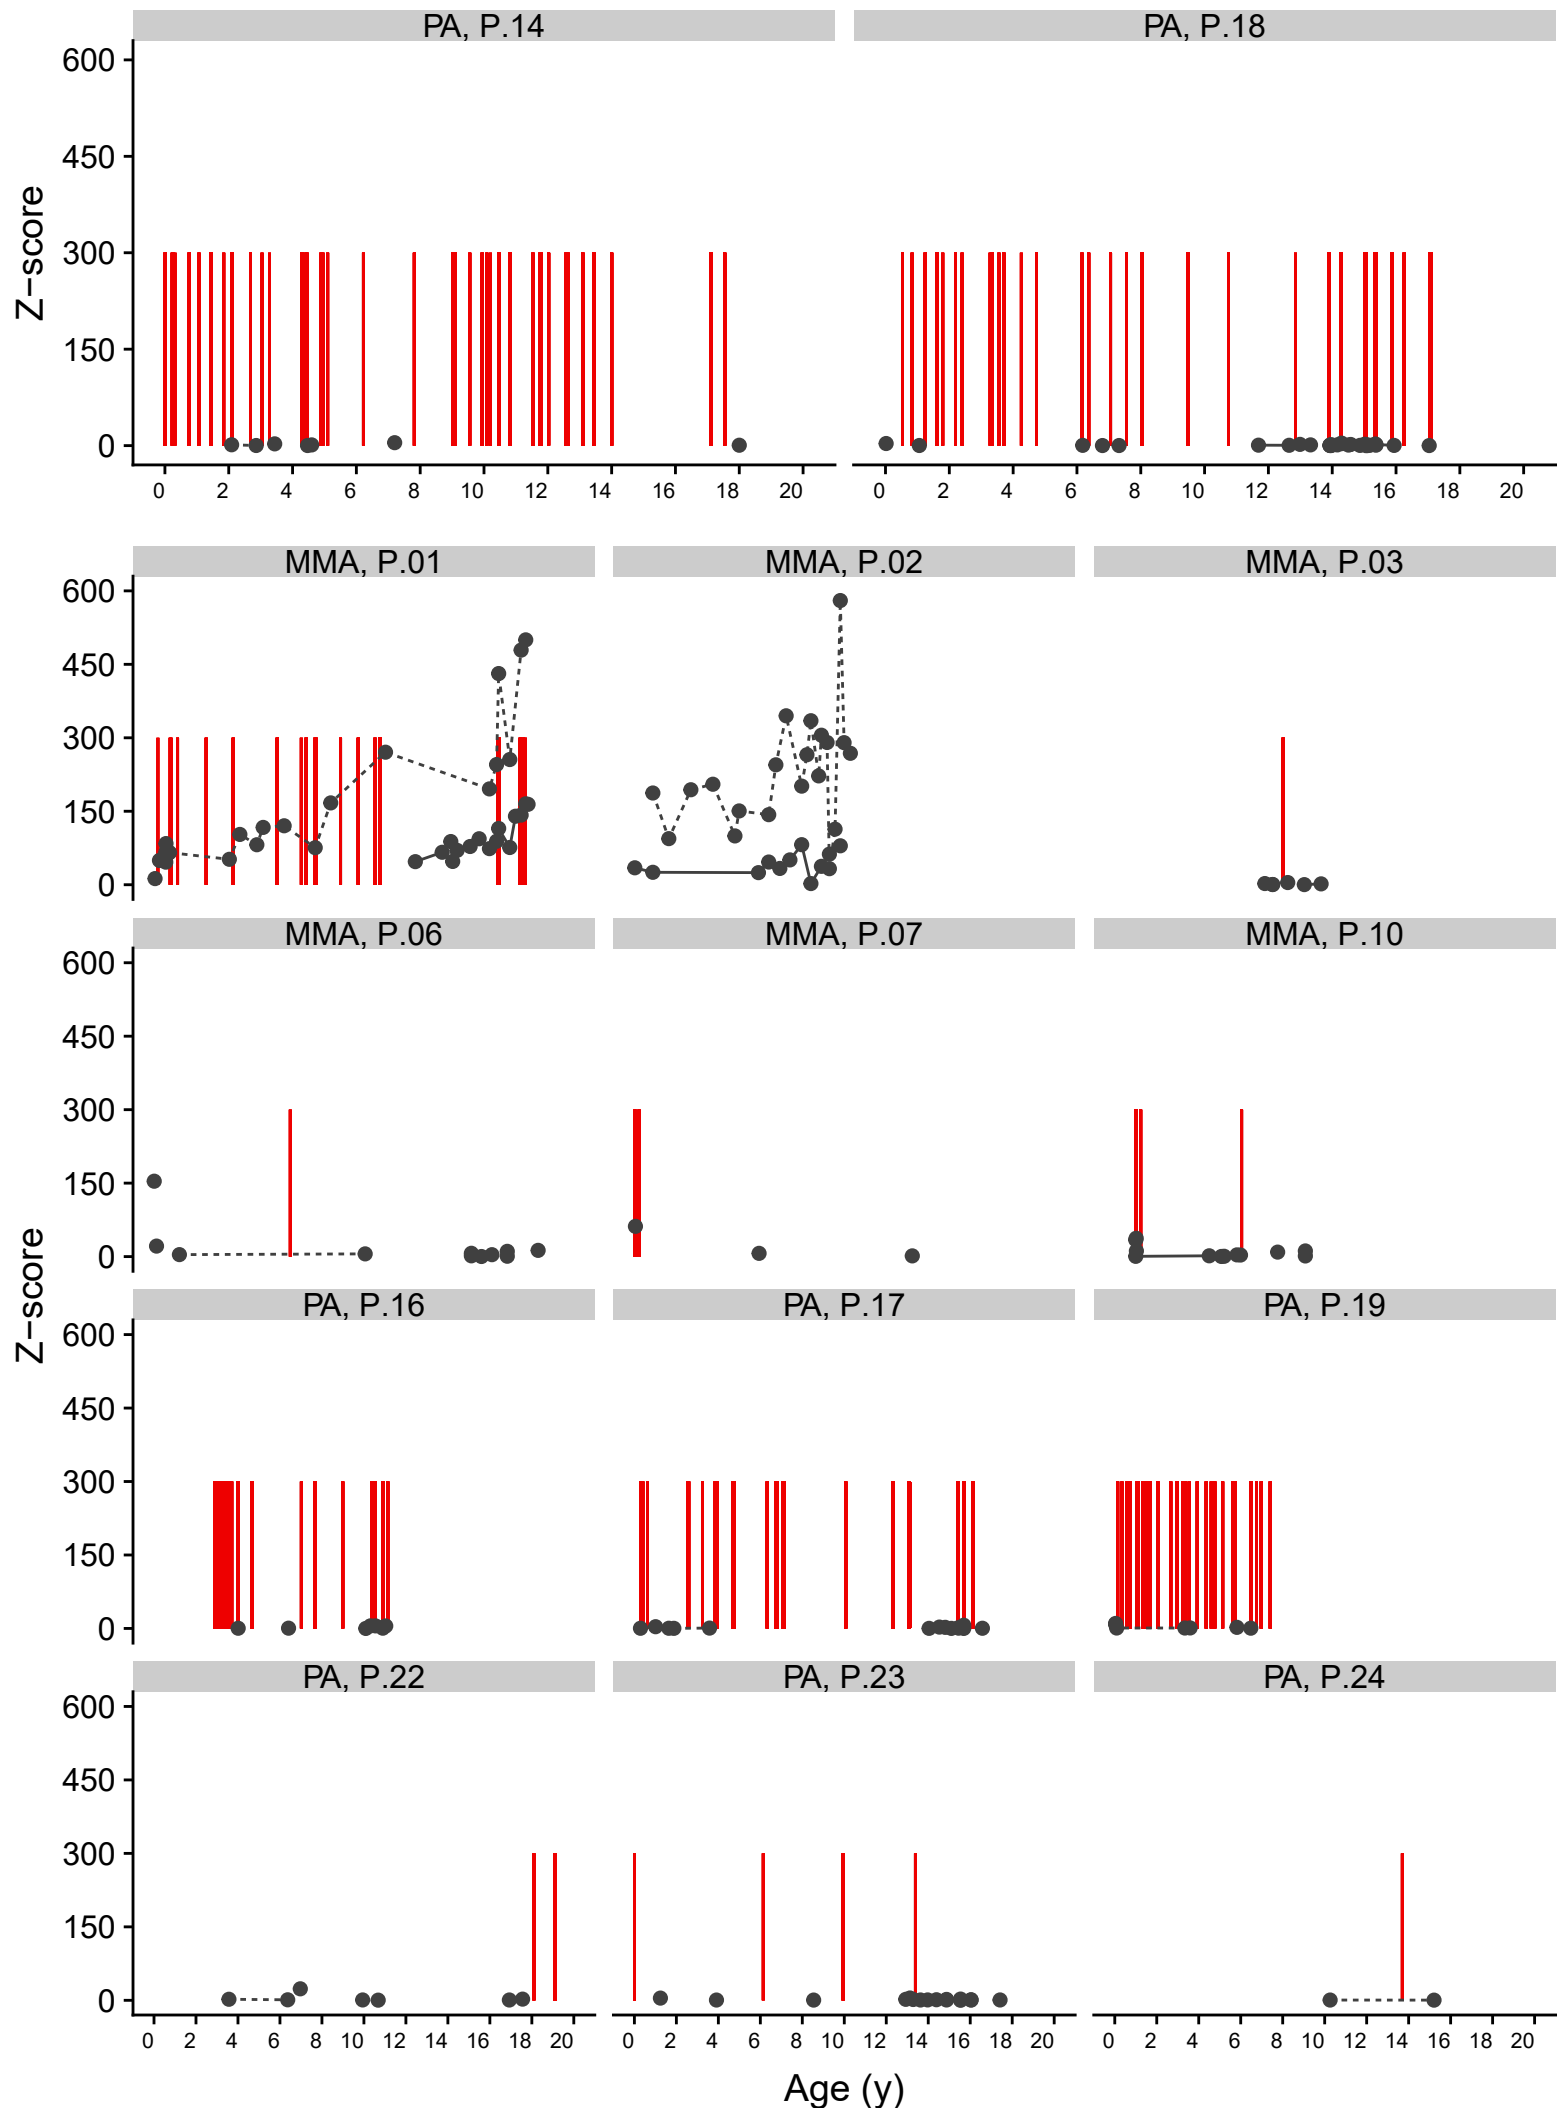

Leucine (PL)

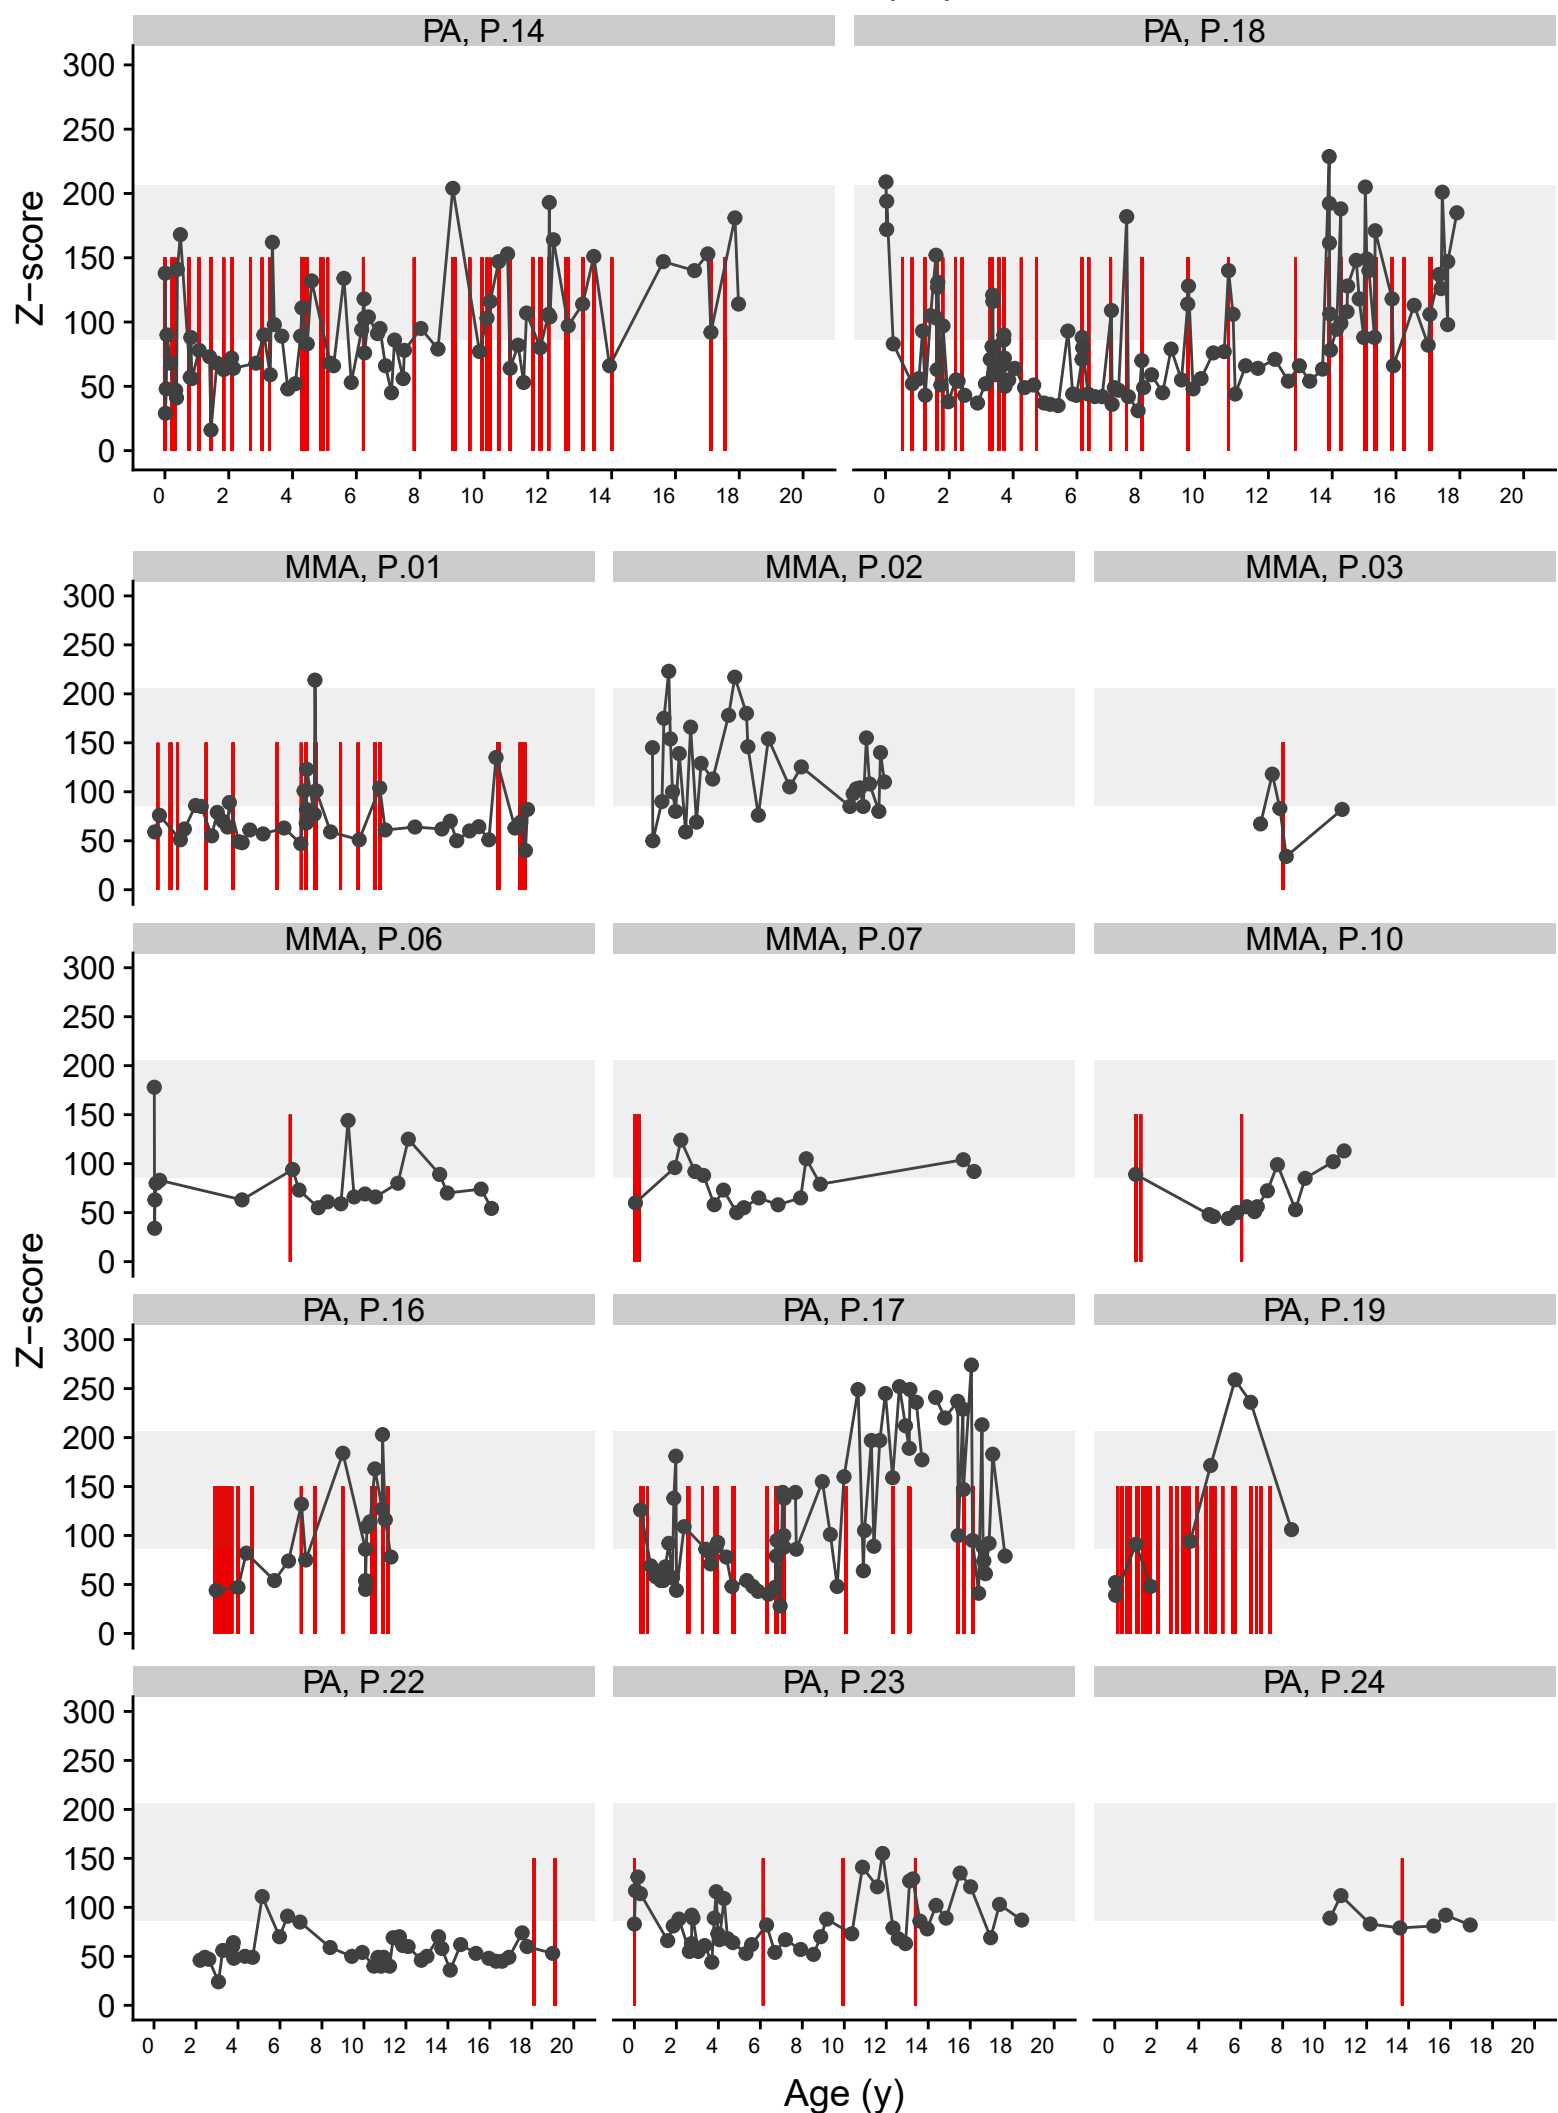

Phenylalanine (PL)

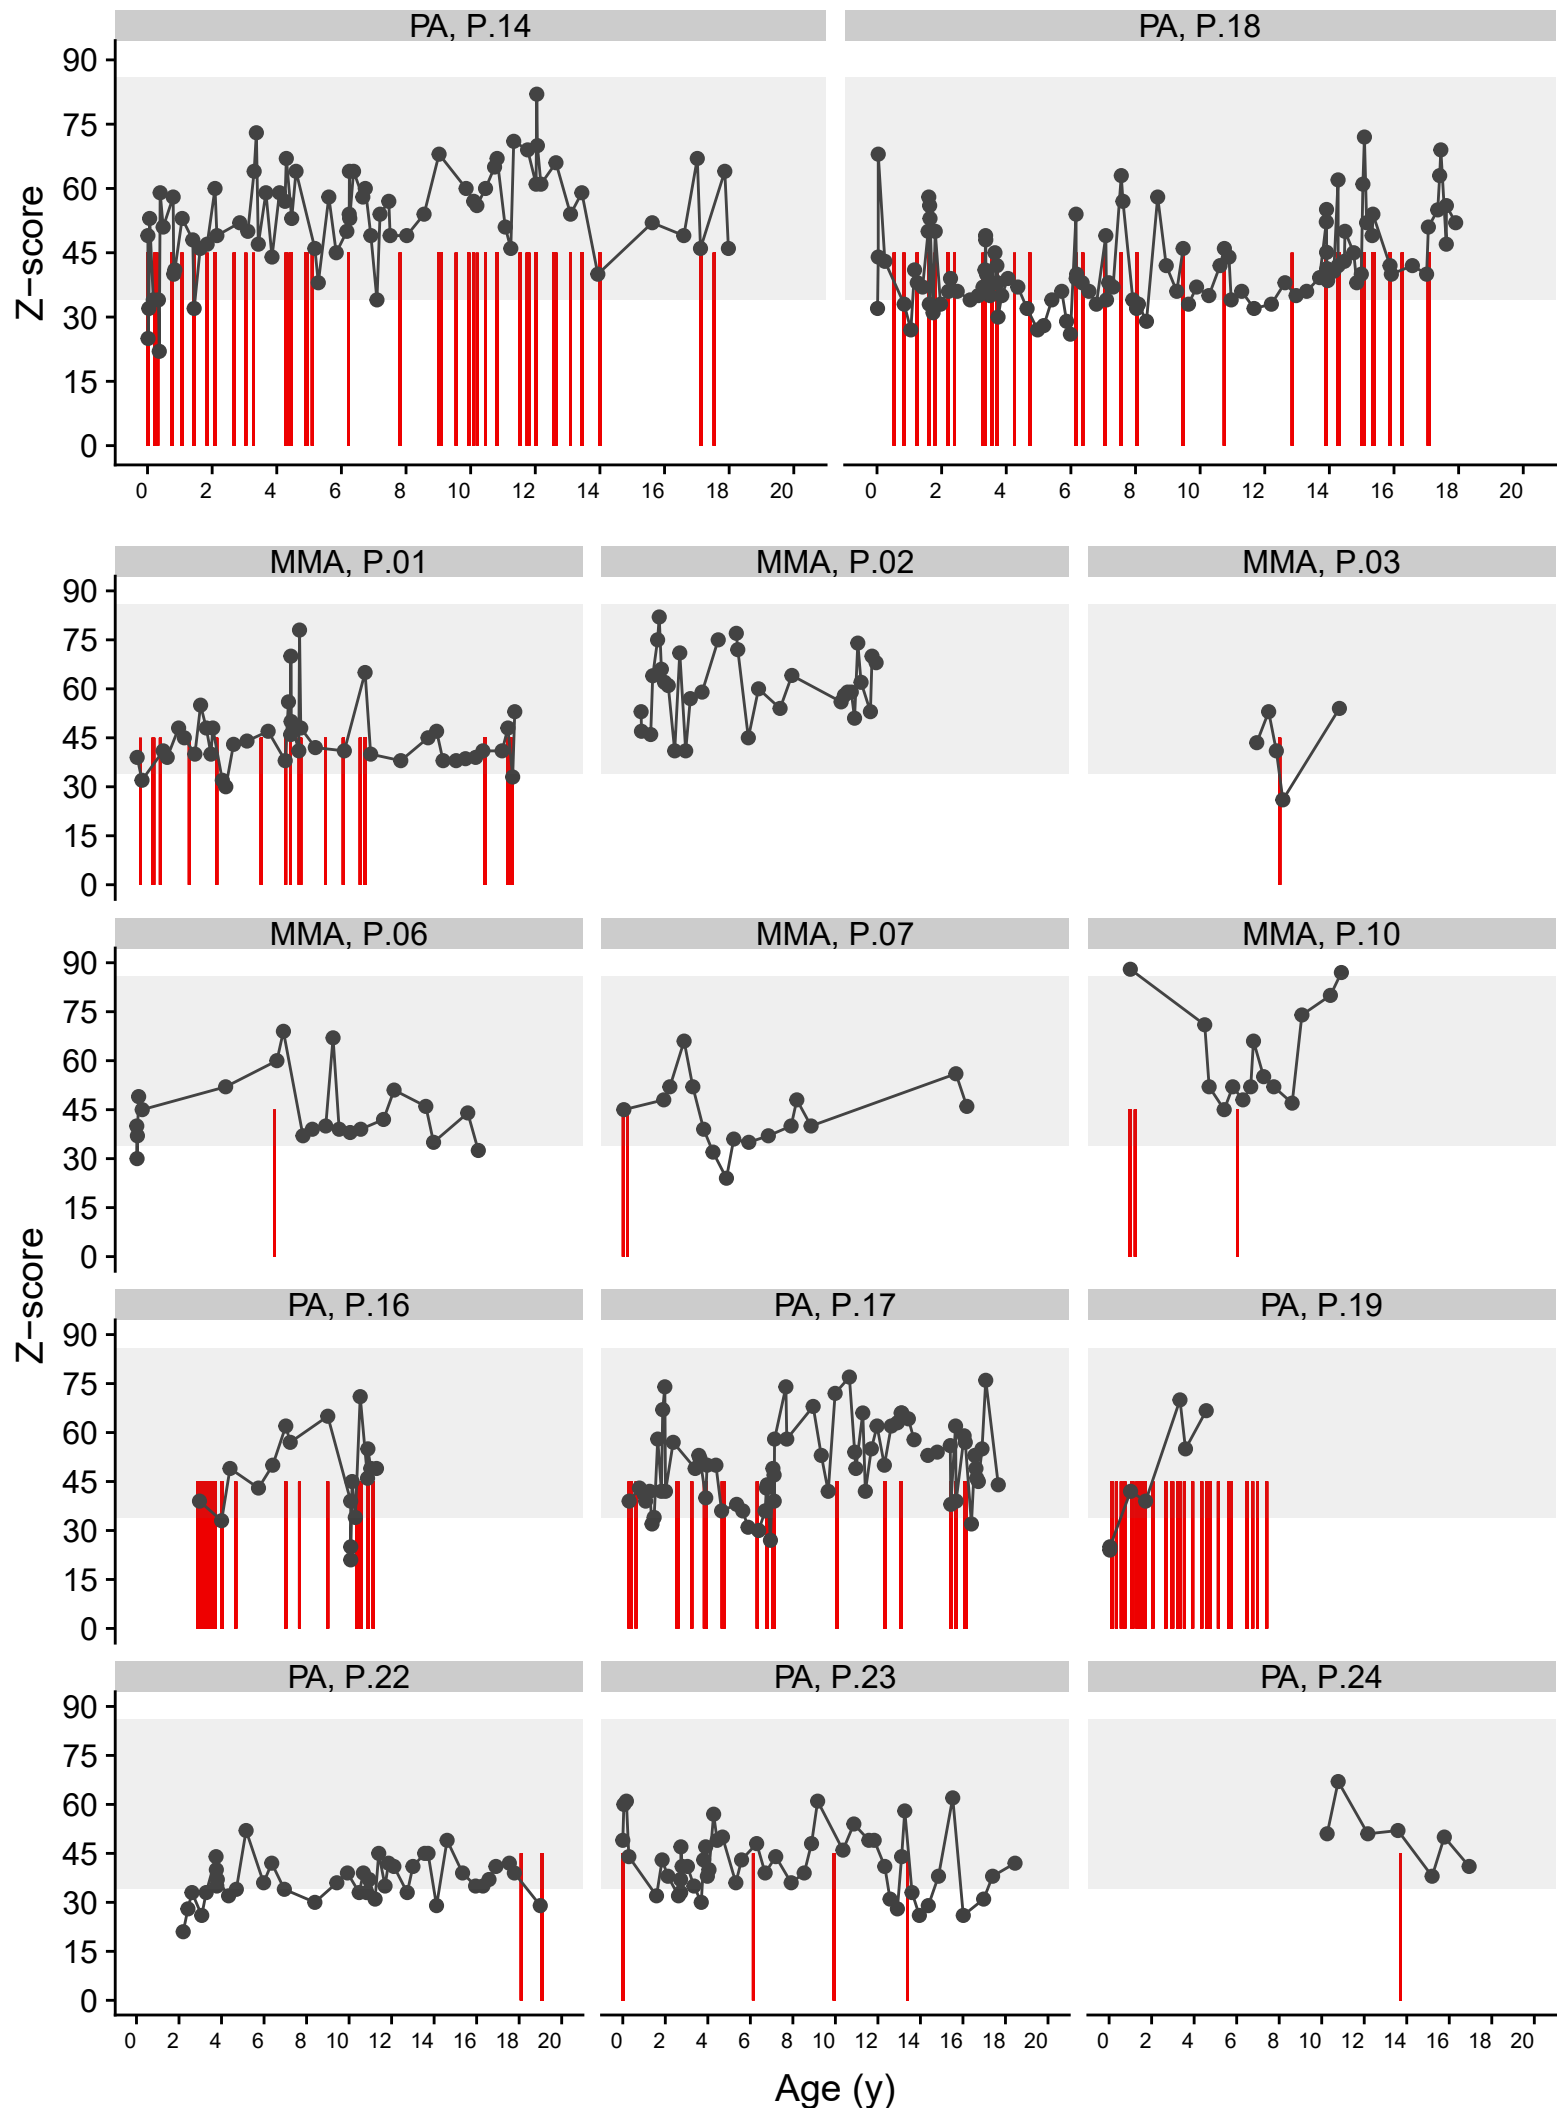

Pyruvate (U)

— Acute metabolic decompensations  
— Urine, targeted

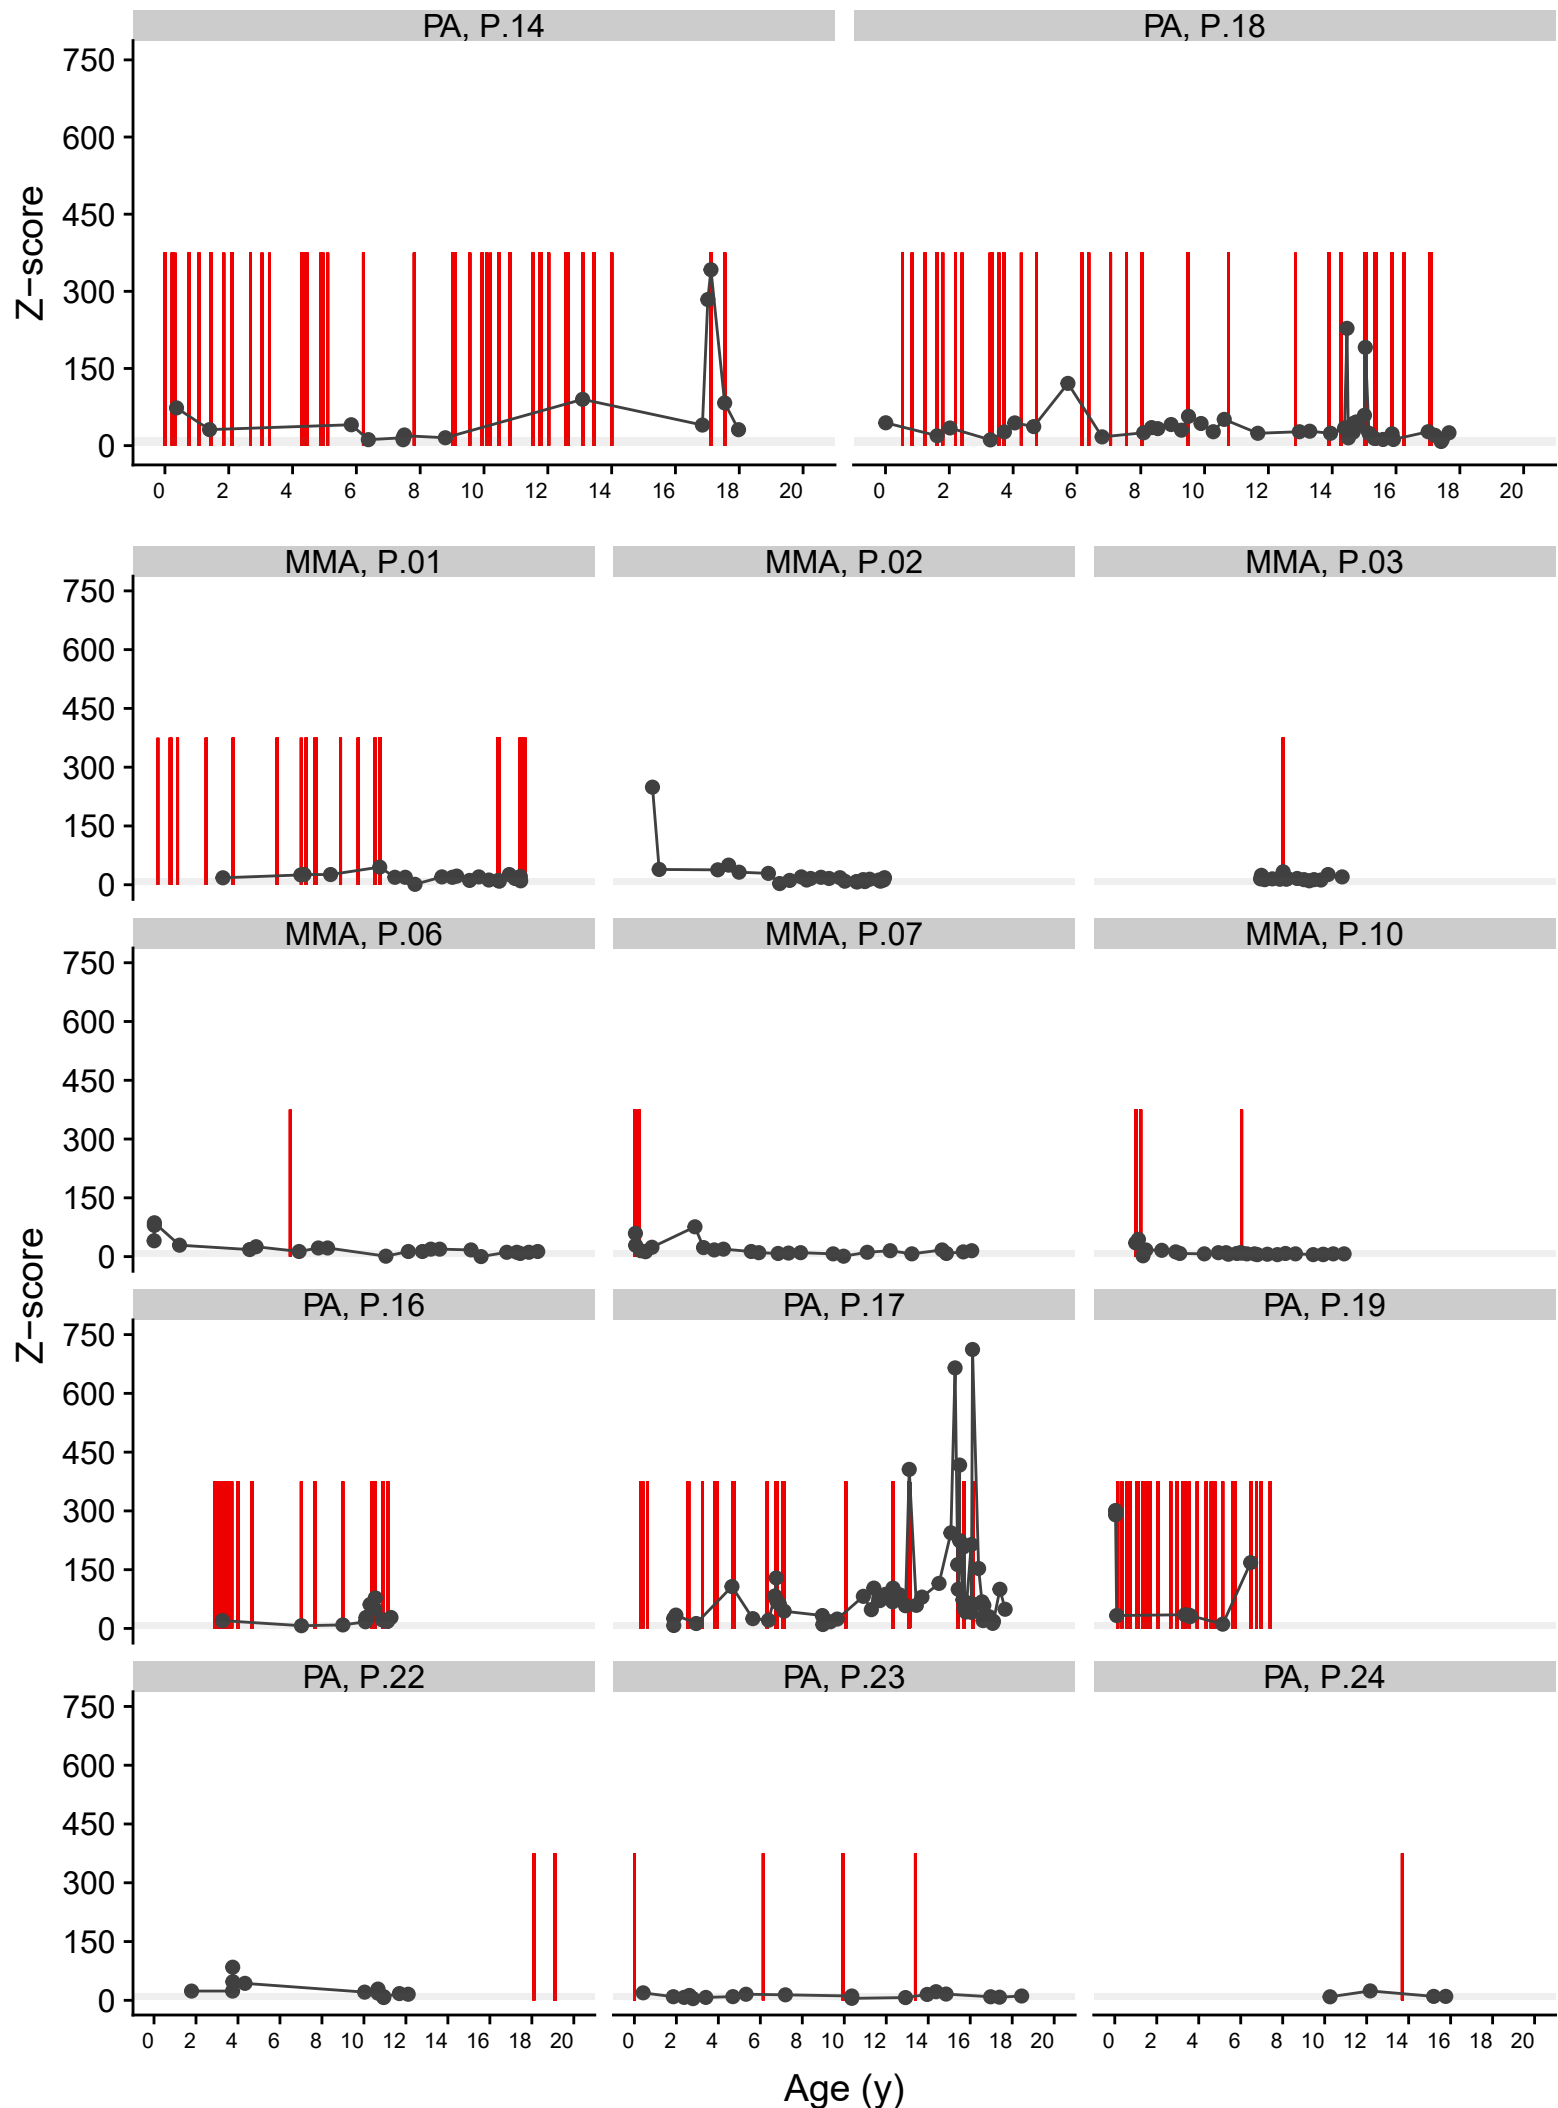

## Pyruvate (DI-HRMS)

— Acute metabolic decompensations

— Dried blood spots

- - - Plasma

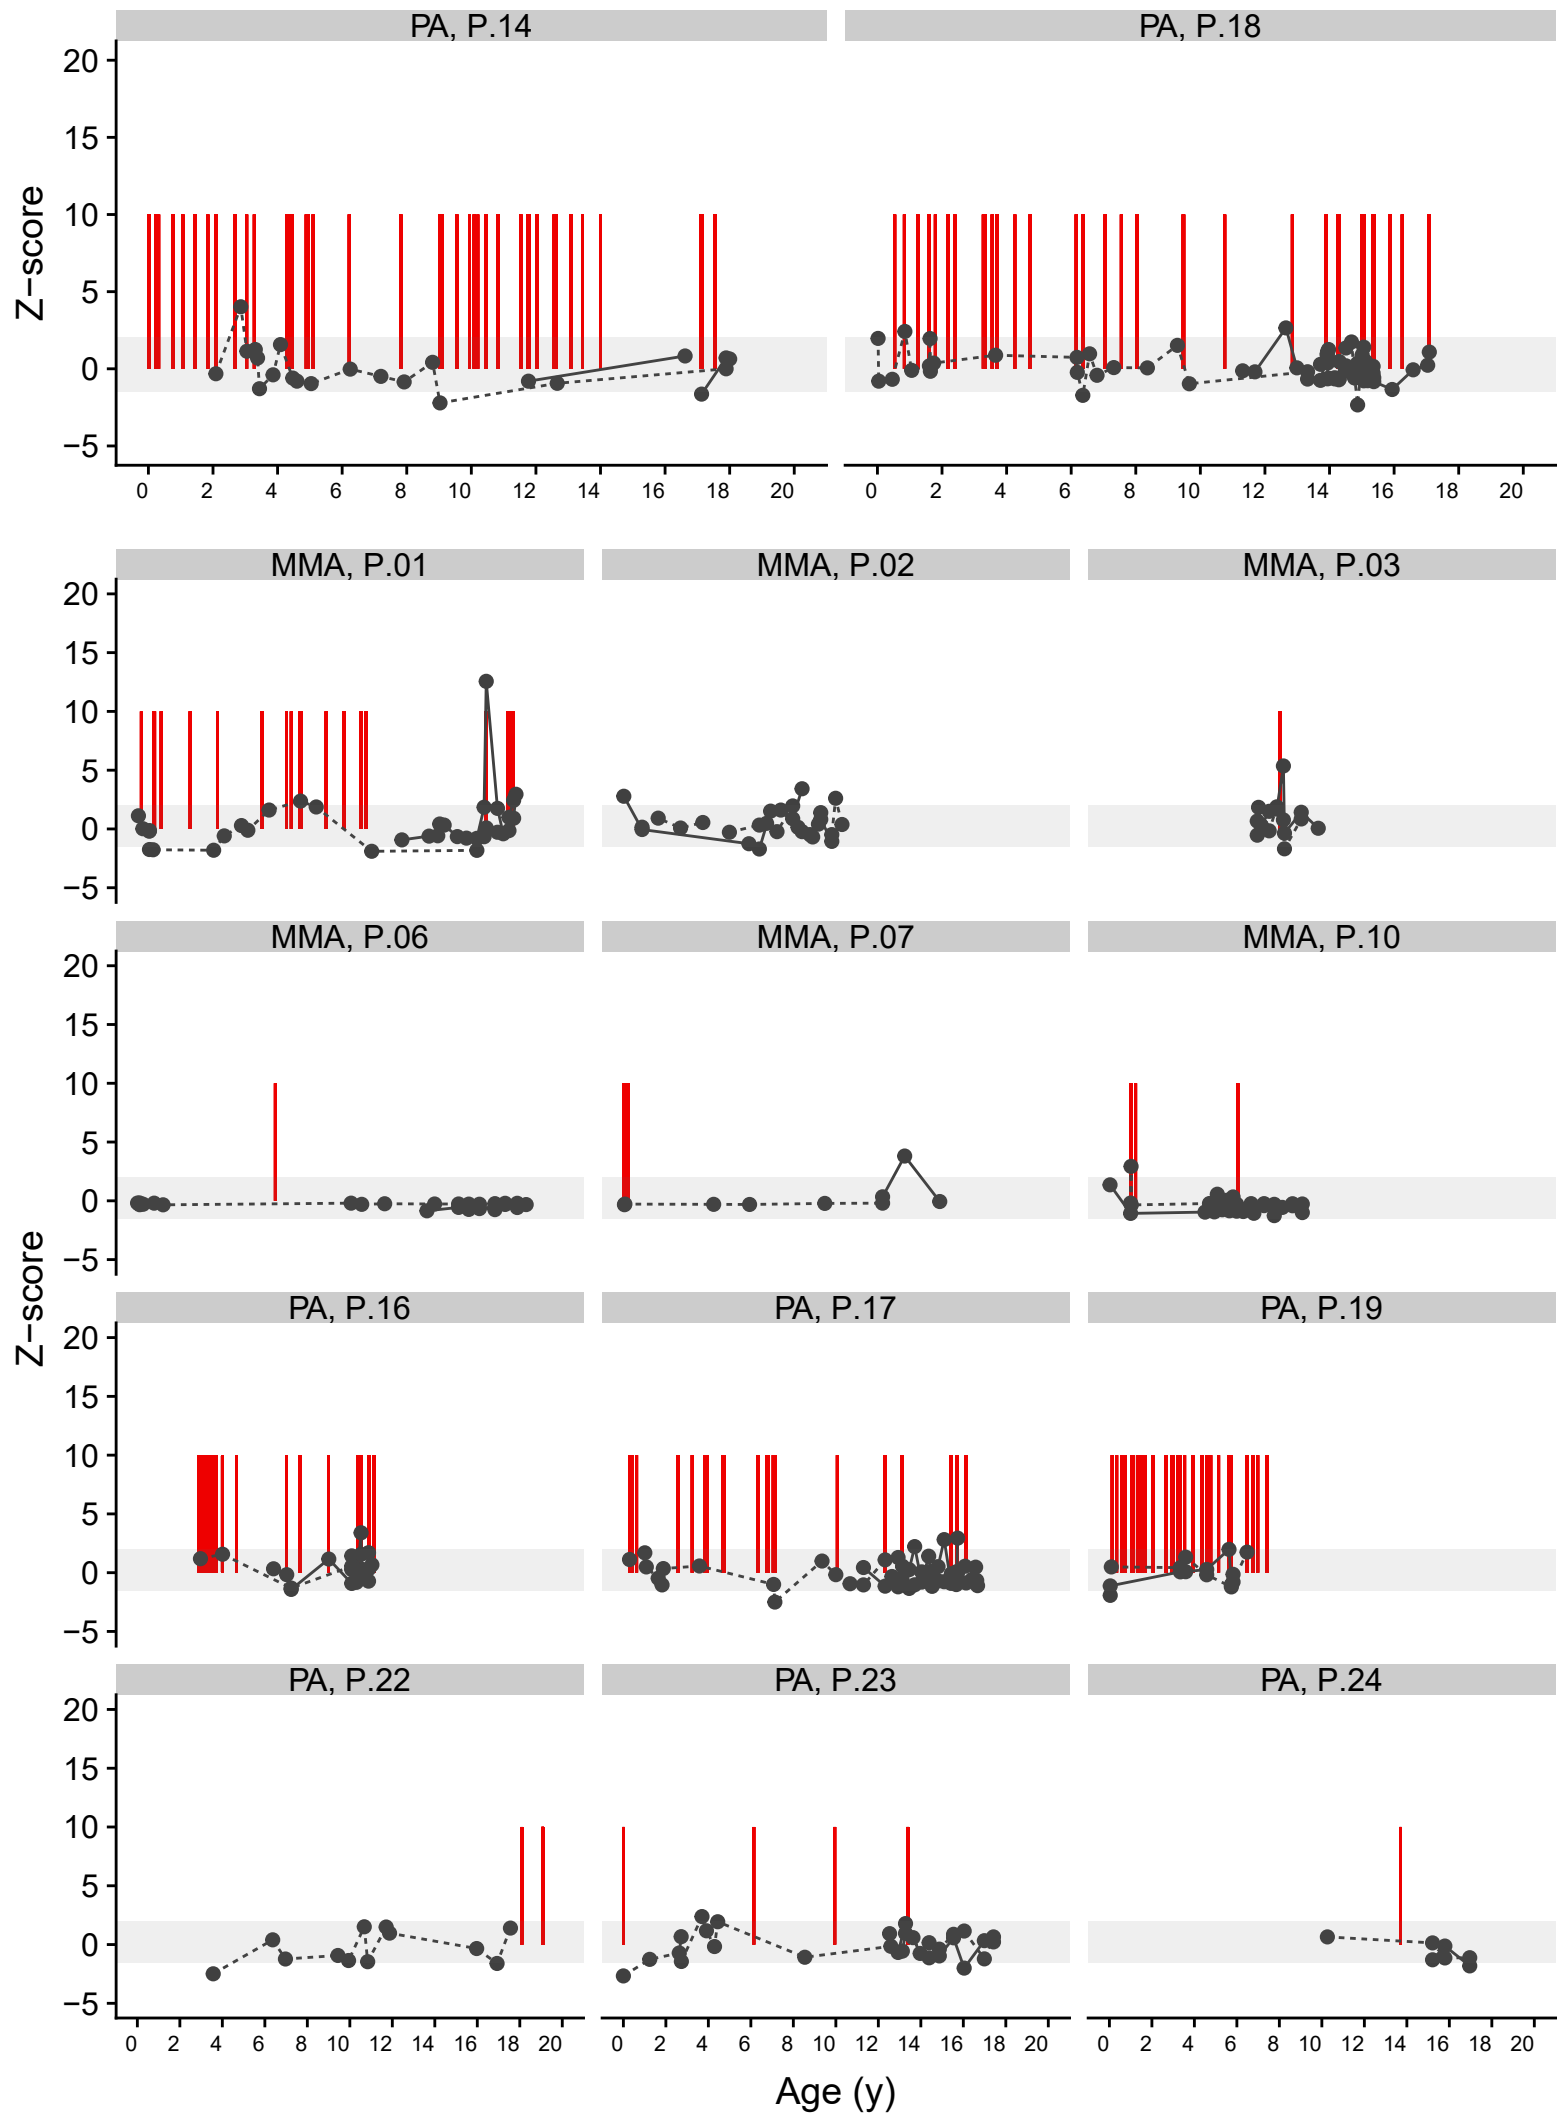

# Supplementary Figure 43

## PLS-DA, VIP-scores and heatmap for AMD samples versus no AMD samples, for PA and MMA

A) DBS

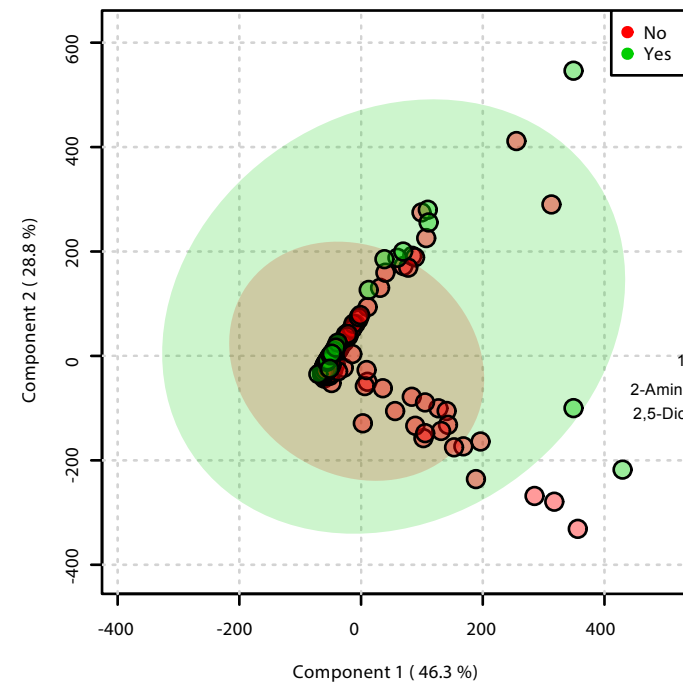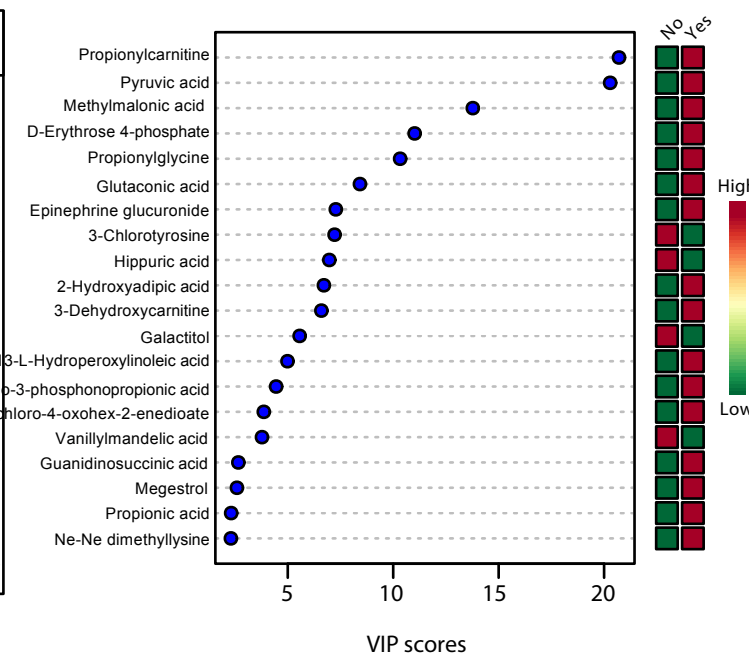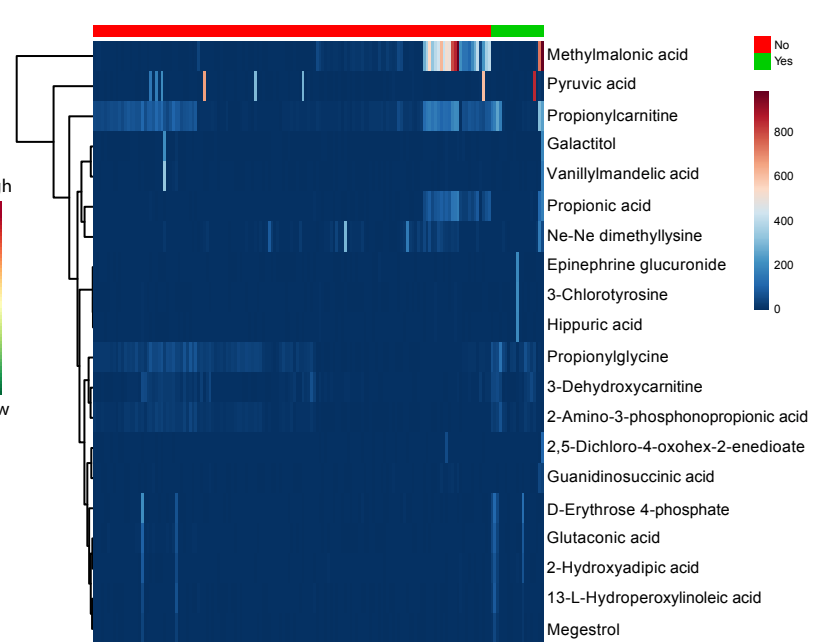

B) Plasma

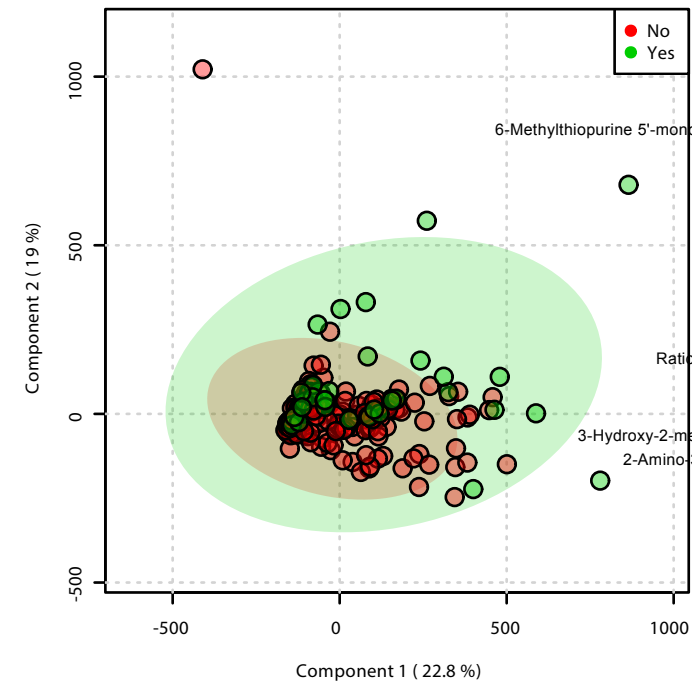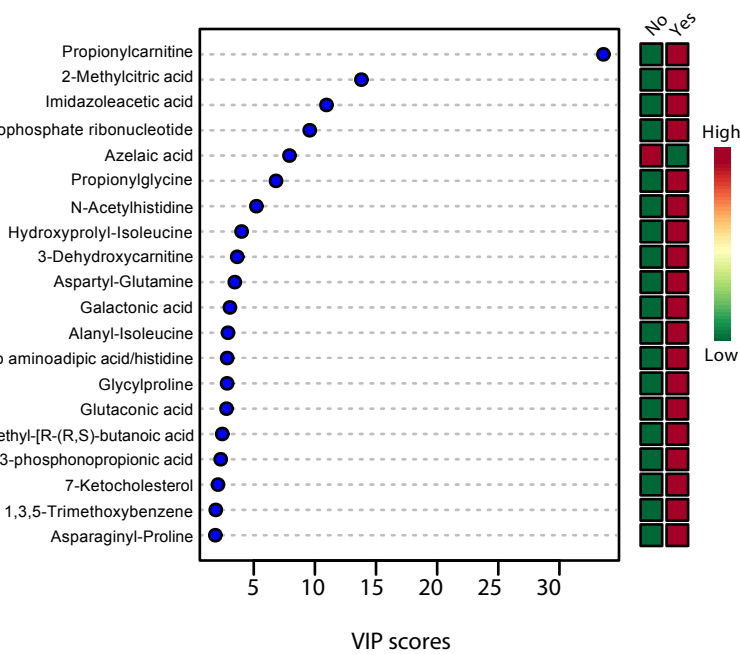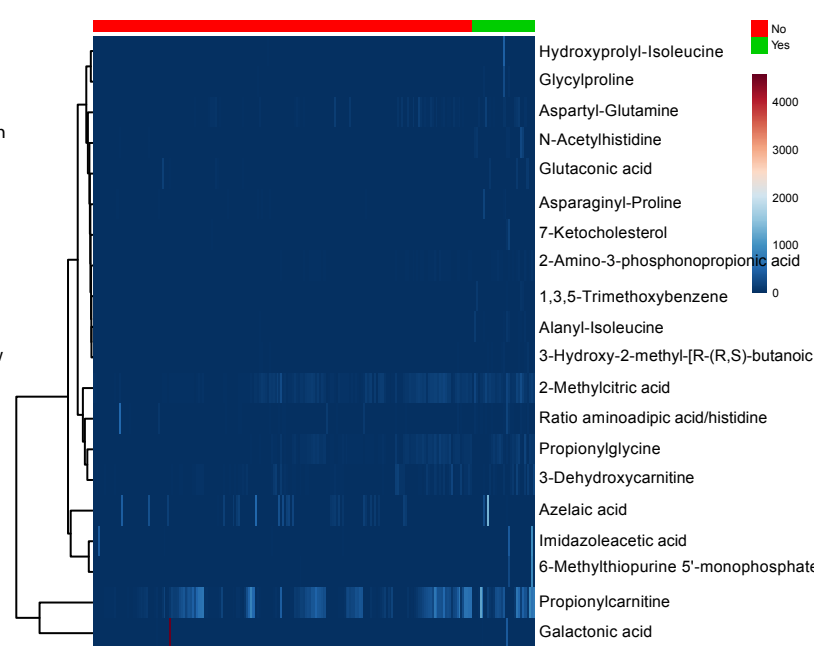

# Supplementary Figure 44

## PLS-DA, VIP-scores and heatmap for AMD samples versus no AMD samples, for PA only

A) DBS

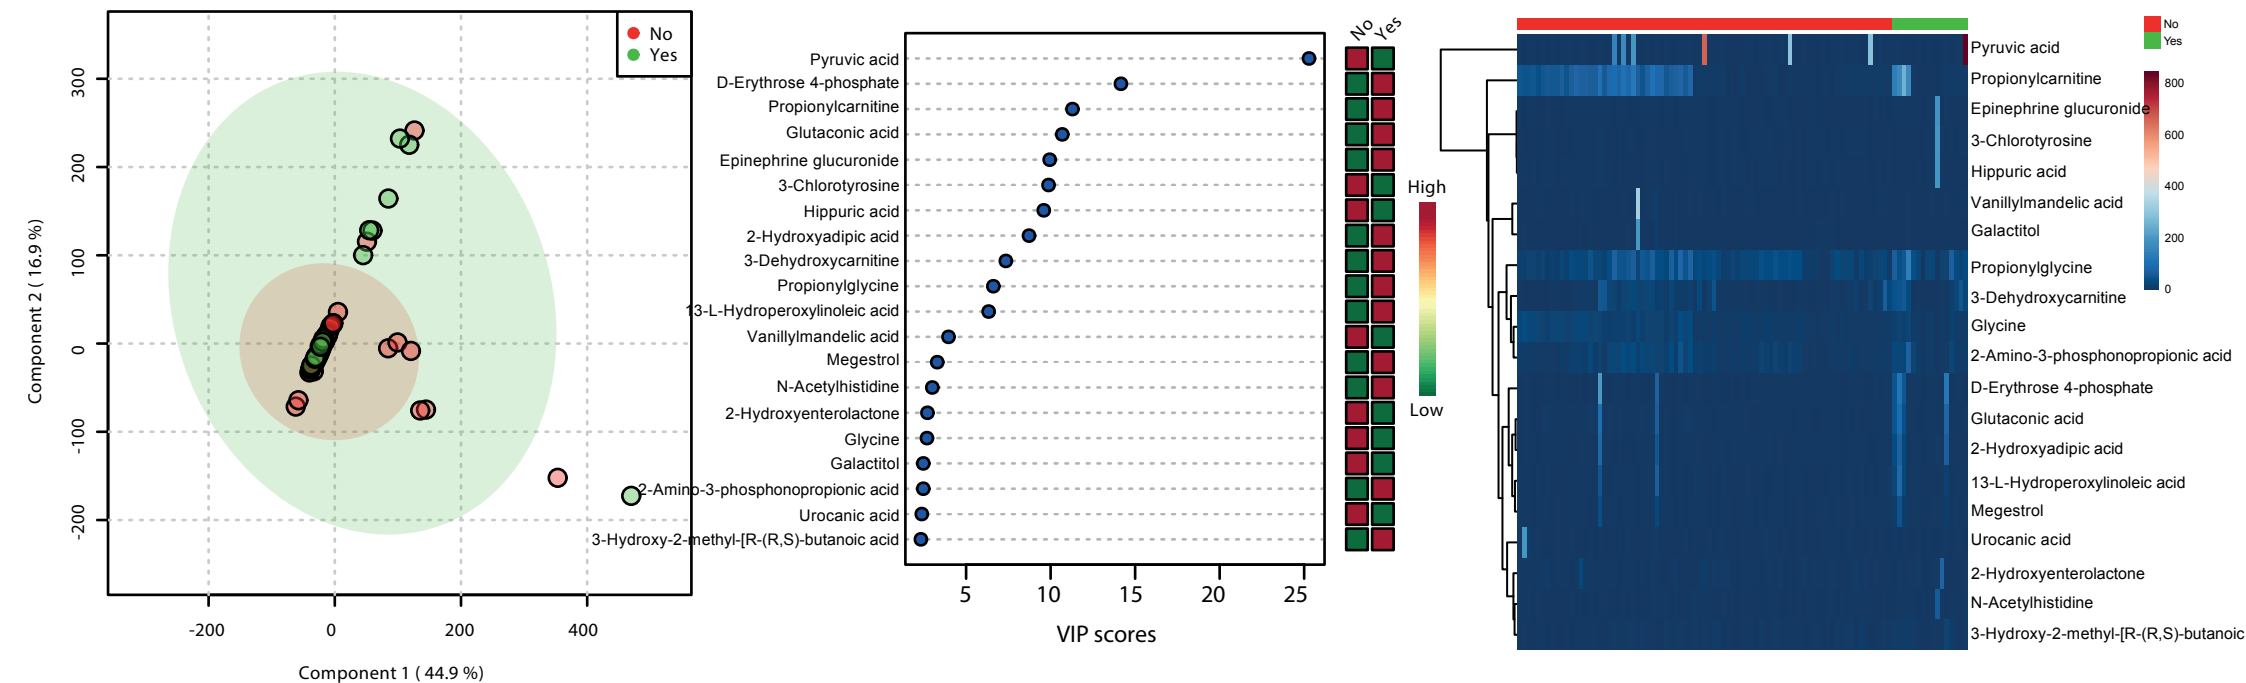

B) Plasma

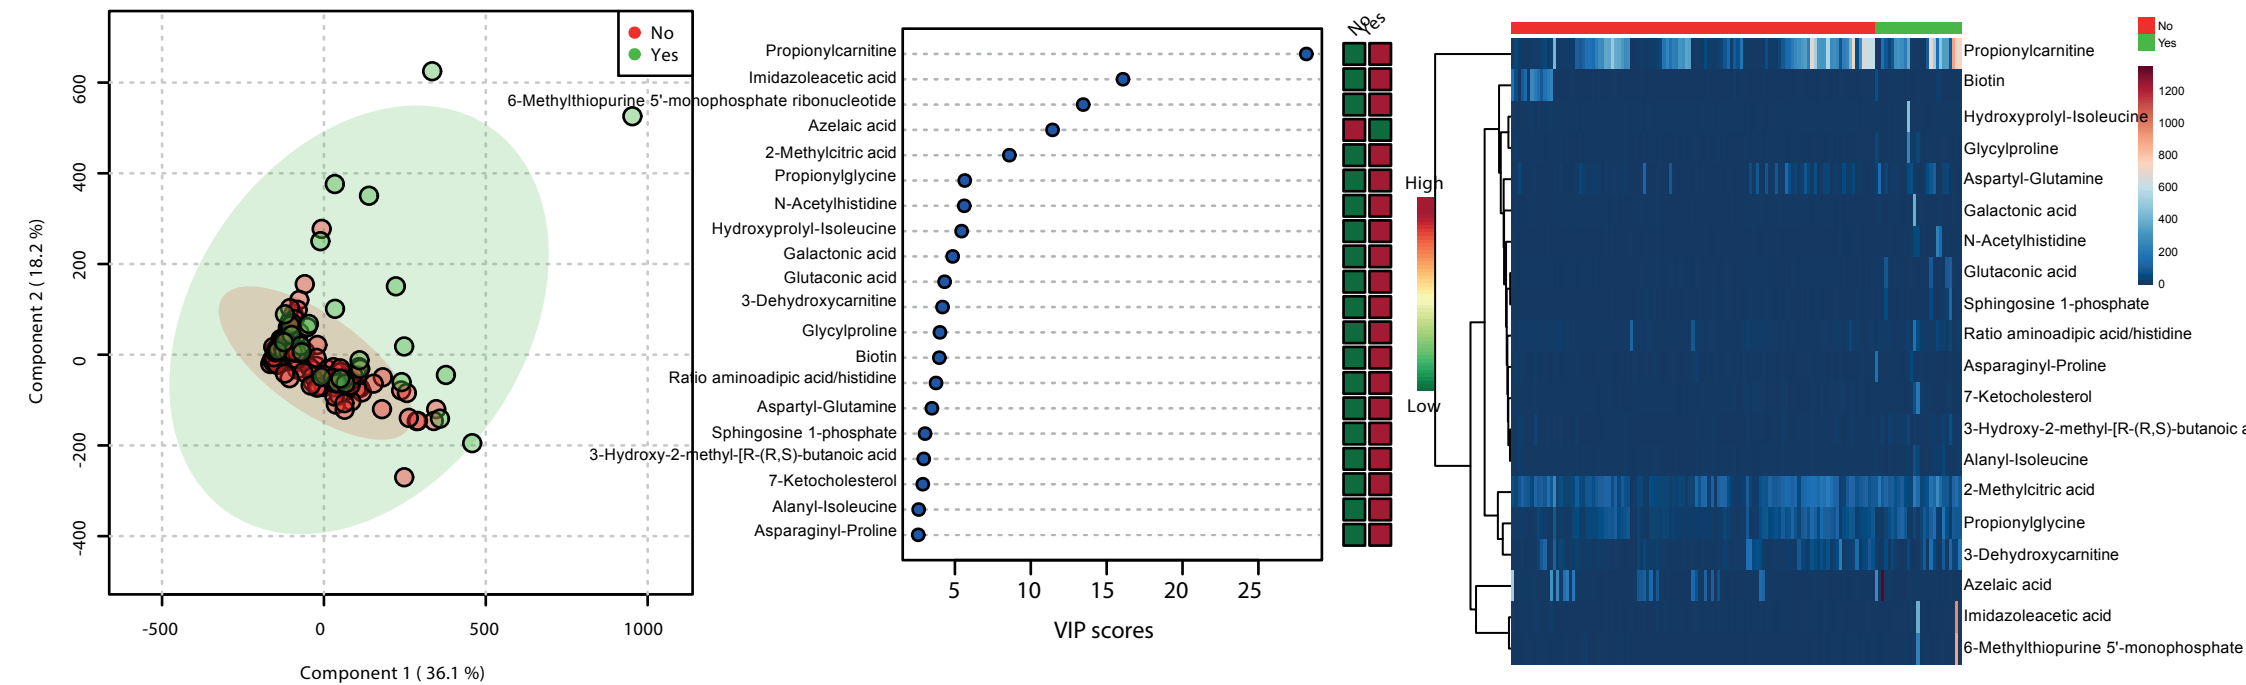

Supplement: 13023_2020_1347_MOESM1_ESM.pdf [file 13023_2020_1347_MOESM1_ESM.pdf]
